# Supplementary material for: Synthesis and Catalytic Activity of Bifunctional Phase-Transfer Organocatalysts Based on Camphor
Source: MDPI journal article supplement (doi:10.3390/molecules28031515), 2023-02-03
Supplement: s1 [file s1]

## SUPPORTING INFORMATION

### Synthesis and Catalytic Activity of Bifunctional Phase-Transfer Organocatalysts Based on Camphor

Luka Ciber,<sup>1</sup> Franc Požgan,<sup>1</sup> Helena Brodnik,<sup>1</sup> Bogdan Štefane,<sup>1</sup> Jurij Svete,<sup>1</sup> Mario Waser,<sup>2</sup> and Uroš Grošelj\*<sup>1</sup>

<sup>1</sup> Chair of Organic Chemistry, Faculty of Chemistry and Chemical Technology, University of Ljubljana, Večna pot 113, 1000 Ljubljana, Slovenia; E-mail: [uros.groselj@fkkt.uni-lj.si](mailto:uros.groselj@fkkt.uni-lj.si)

<sup>2</sup> Institute of Organic Chemistry, Johannes Kepler University Linz, Altenbergerstrasse 69, 4040 Linz, Austria; E-mail: [mario.waser@jku.at](mailto:mario.waser@jku.at); <https://www.jku.at/orc/waser>

#### Table of contents

|                                                                               |     |
|-------------------------------------------------------------------------------|-----|
| 1. Materials and methods, syntheses, and characterization .....               | 2   |
| 2. HPLC data .....                                                            | 28  |
| 3. Copies of <sup>1</sup> H- and <sup>13</sup> C-NMR spectra .....            | 69  |
| 4. Determination of the absolute configuration at the C-2 chiral center ..... | 101 |
| 5. Copies of HRMS reports of products .....                                   | 102 |
| 6. X-Ray crystallography .....                                                | 123 |
| 7. References .....                                                           | 128 |

## 1. Materials and methods, syntheses, and characterization

Solvents for extractions and chromatography were of technical grade and were distilled prior to use. Extracts were dried over technical grade anhydrous Na<sub>2</sub>SO<sub>4</sub>. Melting points were determined on a Kofler micro hot stage. The NMR spectra were obtained on a Bruker Avance DPX 300 and Bruker Avance III 300 at 300 MHz for <sup>1</sup>H nucleus, Bruker UltraShield 500 plus (Bruker, Billerica, Massachusetts, United States) at 500 MHz for <sup>1</sup>H and 126 MHz for <sup>13</sup>C nucleus, and Bruker Ascend 600 (Bruker, Billerica, Massachusetts, United States) at 600 MHz for <sup>1</sup>H and 151 MHz for <sup>13</sup>C nucleus using DMSO-*d*<sub>6</sub> and CDCl<sub>3</sub> with TMS as the internal standard, as solvents. Mass spectra were recorded on an Agilent 6224 Accurate Mass TOF LC/MS (Agilent Technologies, Santa Clara, California, United States), IR spectra on a Perkin-Elmer Spectrum BX FTIR spectrophotometer (PerkinElmer, Waltham, Massachusetts, United States). CD spectra were recorded on a J-1500 Circular Dichroism Spectrophotometer (JASCO corporation, Tokyo, Japan). Column chromatography (CC) was performed on silica gel (Silica gel 60, particle size: 0.035-0.070 mm (Sigma-Aldrich, St. Louis, Missouri, United States)). HPLC analyses were performed on an Agilent 1260 Infinity LC (Agilent Technologies, Santa Clara, California, United States) and Dionex Summit HPLC system (Dionex Corporation, Sunnyvale, California, United States) using CHIRALPAK AD-H (0.46 cm ø × 25 cm) and CHIRALPAK OJ-H (0.46 cm ø × 25 cm), as chiral column (Chiral Technologies, Inc., West Chester, Pennsylvania, United States). All the commercially available chemicals used were purchased from Sigma-Aldrich (St. Louis, Missouri, United States). (1*S*,2*S*,4*R*)-7,7-dimethyl-1-(pyrrolidin-1-ylmethyl)bicyclo[2.2.1]heptan-2-amine (**1b**) was prepared following the literature procedure<sup>1</sup>.

**Reduction of (1*S*,4*R*,*E*)-1-((dimethylamino)methyl)-7,7-dimethylbicyclo[2.2.1]heptan-2-one oxime**

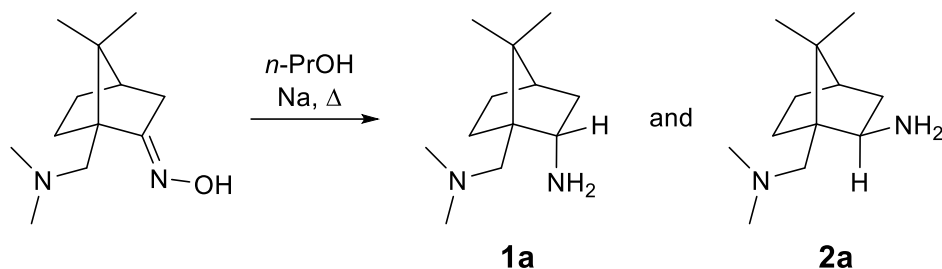

Oxime (7.6 mmol, 1.6 g) was dissolved in propan-1-ol (86 mL) and heated to 95 °C. Then small pieces of sodium (about 50 mg) were added continuously for 1 h at 95 °C; care was taken to ensure that the unreacted sodium (excess sodium) remained present in the reaction mixture at all times during the reaction. After completion of the reaction, the volatiles were evaporated *in vacuo*. The residue was dissolved in a mixture of water (20 mL) and Et<sub>2</sub>O (80 mL). The organic phase was washed with water (2 × 20 mL) and NaCl (aq. sat., 1 × 20 mL), dried over anhydrous Na<sub>2</sub>SO<sub>4</sub>, and the volatiles were evaporated *in vacuo*. Diastereomers **1a** and **2a** were formed in a ratio of 2.6 : 1. The diastereomers were separated by column chromatography (Silica gel 60, EtOAc/MeOH/Et<sub>3</sub>N = 4 : 1 : 1).

**(1*S*,2*R*,4*R*)-1-((Dimethylamino)methyl)-7,7-dimethylbicyclo[2.2.1]heptan-2-amine (2a)**

Elutes first from the column. Yield: 175 mg (0.89 mmol, 12%) of colorless oil. <sup>1</sup>H-NMR (500 MHz, CDCl<sub>3</sub>):  $\delta$  0.79 (s, 3H), 1.05 (s, 3H), 1.06 – 1.13 (m, 1H), 1.34 (ddd, *J* = 12.8, 9.4, 3.9, 1H), 1.54 – 1.61 (m, 3H), 1.63 (t, *J* = 4.3, 1H), 1.64 – 1.75 (m, 2H), 1.93 (d, *J* = 11.4, 1H), 2.02 (d, *J* = 13.0, 1H), 2.27 (s, 6H), 2.74 (d, *J* = 13.0, 1H), 3.11 (dd, *J* = 8.7, 5.1, 1H).

**(1*S*,2*S*,4*R*)-1-((Dimethylamino)methyl)-7,7-dimethylbicyclo[2.2.1]heptan-2-amine (1a)**

Elutes second from the column. Yield: 850 mg (4.33 mmol, 57%) of colorless oil. <sup>1</sup>H-NMR (500 MHz, CDCl<sub>3</sub>):  $\delta$  0.67 (dd, *J* = 12.9, 4.3, 1H), 0.86 (s, 3H), 0.89 (s, 3H), 1.22 (ddd, *J* = 12.3, 9.5, 4.4, 1H), 1.38 (ddd, *J* = 12.3, 4.5, 2.0, 1H), 1.49 (t, *J* = 4.6, 1H), 1.70 – 1.79 (m, 1H), 1.80 (br s, 2H), 2.10 (d, *J* = 13.1, 1H), 2.13 – 2.17 (m, 1H), 2.20 (s, 6H), 2.21 – 2.26 (m, 1H), 2.45 (d, *J* = 13.0, 1H), 3.36 (ddd, *J* = 10.6, 4.3, 2.0, 1H).

**Boc protection of chiral amines – *General procedure 1 (GPI)***

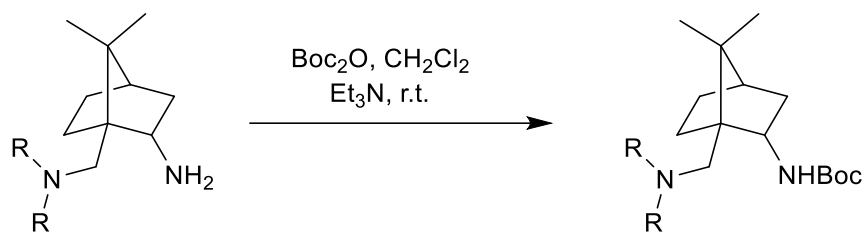

To a solution of amine **1** or **2** and triethylamine (1.4 equivalents) in anhydrous  $\text{CH}_2\text{Cl}_2$  was added di-*tert*-butyl dicarbonate (1.4 equivalents). The resulting reaction mixture was stirred at  $25^\circ\text{C}$  for 24 hours. Dichloromethane was evaporated *in vacuo* and the residue was purified by column chromatography (CC). The fractions containing product **3** or **4** were combined and the volatiles were evaporated *in vacuo*.

***tert*-Butyl ((1*S*,2*S*,4*R*)-1-((dimethylamino)methyl)-7,7-dimethylbicyclo[2.2.1]heptan-2-yl)carbamate (**3a**)**

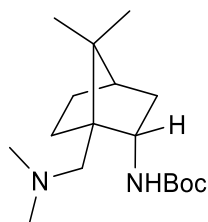

Following *GPI*. Prepared from (1*S*,2*S*,4*R*)-1-((dimethylamino)methyl)-7,7-dimethylbicyclo[2.2.1]heptan-2-amine (**1a**) (4.69 mmol, 920 mg) and di-*tert*-butyl dicarbonate (6.56 mmol, 1.431 g), Et<sub>3</sub>N (6.56 mmol, 915  $\mu$ L), CH<sub>2</sub>Cl<sub>2</sub> (20 mL), 25°C, 24 h. Isolation by column chromatography (Silica gel 60, EtOAc/petroleum ether = 1 : 5). Yield: 1.39 g (4.69 mmol, 99%) of colorless oil.  $[\alpha]_D^{25} = +11.2$  (0.15, MeOH). EI-HRMS:  $m/z = 297.2646$  (MH)<sup>+</sup>; C<sub>17</sub>H<sub>33</sub>N<sub>2</sub>O<sub>2</sub><sup>+</sup> requires:  $m/z = 297.2536$  (MH)<sup>+</sup>;  $\nu_{\max}$  3346, 2935, 2819, 2765, 1698, 1483, 1454, 1389, 1364, 1297, 1242, 1167, 1114, 1065, 1040, 1014, 946, 874, 837, 780 cm<sup>-1</sup>. <sup>1</sup>H-NMR (500 MHz, CDCl<sub>3</sub>):  $\delta$  0.86 (*s*, 3H), 0.90 (*s*, 3H), 1.04 (*dd*, *J* = 13.4, 4.3, 1H), 1.21 (*ddd*, *J* = 12.2, 9.5, 4.4, 1H), 1.43 (*s*, 9H), 1.45 – 1.51 (*m*, 1H), 1.56 (*t*, *J* = 4.6, 1H), 1.72 (*tq*, *J* = 12.1, 4.1, 1H), 1.86 (*br t*, 1H), 2.21 (*s*, 6H), 2.24 (*d*, *J* = 13.6, 1H), 2.28 – 2.33 (*m*, 1H), 2.36 (*d*, *J* = 13.8, 1H), 3.75 (*s*, 1H), 6.00 (*s*, 1H). <sup>13</sup>C-NMR (126 MHz, CDCl<sub>3</sub>):  $\delta$  19.19, 20.31, 25.40, 28.39, 28.64, 37.92, 45.07, 48.10, 48.33, 50.98, 56.25, 61.97, 78.72, 157.52.

***tert*-Butyl ((1*S*,2*R*,4*R*)-1-((dimethylamino)methyl)-7,7-dimethylbicyclo[2.2.1]heptan-2-yl)carbamate (**4a**)**

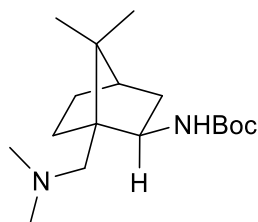

Following *GPI*. Prepared from ((1*S*,2*R*,4*R*)-1-((dimethylamino)methyl)-7,7-dimethylbicyclo[2.2.1]heptan-2-amine (**2a**) (0.81 mmol, 160 mg) and di-*tert*-butyl dicarbonate (1.134 mmol, 247 mg), Et<sub>3</sub>N (1.19 mmol, 166  $\mu$ L), CH<sub>2</sub>Cl<sub>2</sub> (4 mL), 25°C, 24 h. Isolation by column chromatography (Silica gel 60, EtOAc/petroleum ether = 1 : 5). Yield: 230 mg (0.78 mmol, 95%) of colorless oil.  $[\alpha]_D^{25} = +25.7$  (0.175, MeOH). EI-HRMS:  $m/z = 297.2536$  (MH)<sup>+</sup>; C<sub>17</sub>H<sub>33</sub>N<sub>2</sub>O<sub>2</sub><sup>+</sup> requires:  $m/z = 297.2537$  (MH)<sup>+</sup>;  $\nu_{\max}$  3344, 2935, 2819, 2765, 1698, 1484, 1453, 1389, 1364, 1297, 1243, 1167, 1113, 1065, 1040, 1004, 943, 874, 837, 780 cm<sup>-1</sup>. <sup>1</sup>H-NMR (500 MHz, CDCl<sub>3</sub>):  $\delta$  0.87 (*s*, 3H), 0.99 (*s*, 3H), 1.09 – 1.17 (*m*, 1H), 1.34 (*t*, *J* = 9.4, 1H), 1.42 – 1.45 (*m*, 1H), 1.43 (*s*, 9H), 1.67 (*d*, *J* = 3.5, 2H), 1.69 – 1.75 (*m*, 1H), 1.86 (*d*, *J* = 8.4, 1H), 2.24 (*s*, 6H), 2.25 (*d*, *J* = 13.9, 1H), 2.40 (*d*, *J* = 13.9, 1H), 3.71 (*br s*, 1H), 5.58 (*br s*, 1H). <sup>13</sup>C-NMR (126 MHz, CDCl<sub>3</sub>):  $\delta$  20.95, 27.15, 28.50, 28.67, 30.48, 33.79, 40.55, 45.67, 48.03, 50.94, 57.44, 58.86, 78.90, 155.72.

***tert*-Butyl ((1*S*,2*S*,4*R*)-7,7-dimethyl-1-(pyrrolidin-1-ylmethyl)bicyclo[2.2.1]heptan-2-yl)carbamate (**3b**)**

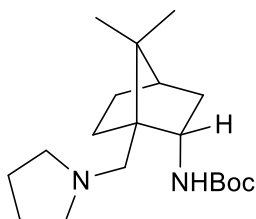

Following *GPI*. Prepared from (1*S*,2*S*,4*R*)-7,7-dimethyl-1-(pyrrolidin-1-ylmethyl)bicyclo[2.2.1]heptan-2-amine (**1b**) (3.91 mmol, 869 mg) and di-*tert*-butyl dicarbonate (5.474 mmol, 1.194 g), Et<sub>3</sub>N (5.474 mmol, 763  $\mu$ L), CH<sub>2</sub>Cl<sub>2</sub> (20 mL), 25°C, 24 h. Isolation by column chromatography (Silica gel 60, EtOAc/petroleum ether = 1 : 5). Yield: 1.251 g (3.88 mmol, 99%) of brownish oil.  $[\alpha]_D^{25} = +1.1$  (0.295, MeOH). EI-HRMS:  $m/z = 323.2688$  (MH)<sup>+</sup>; C<sub>19</sub>H<sub>35</sub>N<sub>2</sub>O<sub>2</sub><sup>+</sup> requires:  $m/z = 323.2693$  (MH)<sup>+</sup>;  $\nu_{\max}$  3300, 2979, 2937, 2879, 2794, 1808, 1757, 1715, 1460, 1395, 1371, 1306, 1250, 1211, 1168, 1113, 1062, 950, 844, 775, 664 cm<sup>-1</sup>. <sup>1</sup>H-NMR (600 MHz, CDCl<sub>3</sub>):  $\delta$  0.85 (*s*, 3H), 0.90 (*s*, 3H), 1.07 (*dd*,  $J = 13.4, 4.4$ , 1H), 1.21 (*ddd*,  $J = 12.8, 9.5, 4.5$ , 1H), 1.4 – 1.45 (*m*, 1H), 1.41 (*s*, 9H), 1.56 (*t*,  $J = 4.6$ , 1H), 1.65 – 1.73 (*m*, 6H), 1.90 (*ddd*,  $J = 13.6, 8.9, 4.1$ , 1H), 2.31 (*s*, 1H), 2.37 (*d*,  $J = 13.4$ , 1H), 2.41 – 2.46 (*m*, 2H), 2.56 – 2.60 (*m*, 2H), 2.66 (*d*,  $J = 13.4$ , 1H), 3.72 (*br s*, 1H), 6.31 (*br s*, 1H). <sup>13</sup>C-NMR (151 MHz, CDCl<sub>3</sub>):  $\delta$  19.18, 20.23, 24.16, 26.03, 28.43, 28.61, 37.58, 45.22, 47.88, 50.81, 56.47, 56.82, 58.03, 78.48, 157.80.

### Benzylation of tertiary amines – *General procedure 2 (GP2)*

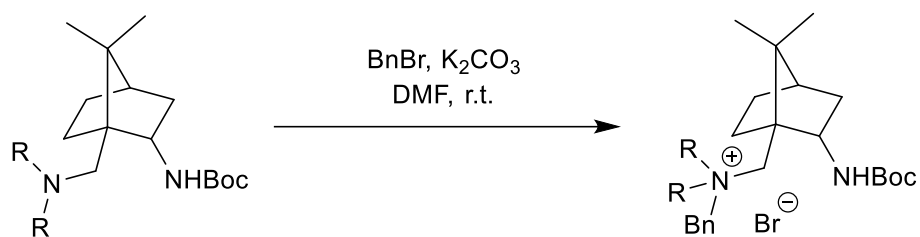

To a solution of tertiary amine **3** or **4** and  $\text{K}_2\text{CO}_3$  (1.1 equivalents) in anhydrous DMF was added benzyl bromide (1.1 equivalents). The resulting reaction mixture was stirred at  $25^\circ\text{C}$  for 24 hours. DMF was evaporated *in vacuo* and the residue was purified by column chromatography (CC). The fractions containing product **5** or **6** were combined and the volatiles were evaporated *in vacuo*.



***N*-Benzyl-1-((1*S*,2*S*,4*R*)-2-((*tert*-butoxycarbonyl)amino)-7,7-dimethylbicyclo[2.2.1]heptan-1-yl)-*N,N*-dimethylmethanaminium bromide (5a)**

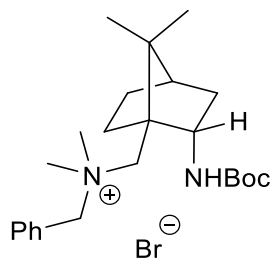

Following *GP2*. Prepared from *tert*-butyl ((1*S*,2*S*,4*R*)-1-((dimethylamino)methyl)-7,7-dimethylbicyclo[2.2.1]heptan-2-yl) (**3a**) (1.06 mmol, 315 mg) and benzyl bromide (1.16 mmol, 139  $\mu$ L),  $\text{K}_2\text{CO}_3$  (1.16 mmol, 160 mg), DMF (5 mL), 25°C, 24 h. Isolation by column chromatography (Silica gel 60, EtOAc/MeOH = 4 : 1). Yield: 340 mg (0.73 mmol, 69%) of colorless oil.  $[\alpha]_{\text{D}}^{25} = +14.0$  (0.087, MeOH). EI-HRMS:  $m/z = 387.3003$  ( $\text{M}^+$ );  $\text{C}_{24}\text{H}_{39}\text{N}_2\text{O}_2$  requires:  $m/z = 387.3006$  ( $\text{M}^+$ );  $\nu_{\text{max}}$  3369, 3197, 2951, 2199, 2163, 2098, 1989, 1685, 1540, 1490, 1477, 1454, 1392, 1379, 1366, 1299, 1284, 1271, 1252, 1217, 1158, 1125, 1065, 1042, 1012, 947, 917, 882, 868, 854, 839, 783, 752, 732, 706  $\text{cm}^{-1}$ .  $^1\text{H-NMR}$  (500 MHz,  $\text{CDCl}_3$ ):  $\delta$  0.87 – 0.93 (*m*, 1H), 0.94 (*s*, 3H), 0.98 (*s*, 3H), 1.29 – 1.34 (*m*, 1H), 1.36 (*s*, 9H), 1.58 (*t*,  $J = 4.4$ , 1H), 1.86 (*br t*,  $J = 11.7$ , 1H), 1.93 – 2.03 (*m*, 1H), 2.21 (*br t*,  $J = 13.1$ , 1H), 2.47 (*d*,  $J = 11.7$ , 1H), 3.17 (*s*, 3H), 3.25 (*s*, 3H), 3.44 (*br d*,  $J = 13.6$ , 1H), 4.11 (*br d*,  $J = 13.5$ , 1H), 4.18 (*br t*,  $J = 9.9$ , 1H), 4.97 (*d*,  $J = 12.3$ , 1H), 5.03 (*br s*, 1H), 5.20 (*d*,  $J = 12.2$ , 1H), 7.32 – 7.43 (*m*, 3H), 7.61 (*d*,  $J = 7.4$ , 2H).  $^{13}\text{C-NMR}$  (126 MHz,  $\text{CDCl}_3$ ):  $\delta$  19.48, 20.76, 27.34, 28.28, 28.75, 40.19, 43.67, 50.40, 51.55, 53.72, 54.15, 69.24, 70.42, 80.67, 127.78, 128.94, 130.51, 133.47, 156.14.

***N*-Benzyl-1-((1*S*,2*R*,4*R*)-2-((*tert*-butoxycarbonyl)amino)-7,7-dimethylbicyclo[2.2.1]heptan-1-yl)-*N,N*-dimethylmethanaminium bromide (6a)**

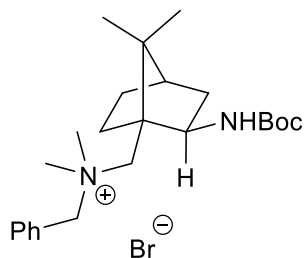

Following *GP2*. Prepared from *tert*-butyl ((1*S*,2*R*,4*R*)-1-((dimethylamino)methyl)-7,7-dimethylbicyclo[2.2.1]heptan-2-yl)carbamate (**4a**) (2.53 mmol, 748 mg) and benzyl bromide (3.795 mmol, 453  $\mu$ L),  $K_2CO_3$  (2.78 mmol, 385 mg), DMF (13 mL), 25°C, 24 h. Isolation by column chromatography (Silica gel 60, EtOAc/MeOH = 4 : 1). Yield: 904 mg (1.93 mmol, 76%) of colorless oil.  $[\alpha]_D^{25} = -4.3$  (0.26, MeOH). EI-HRMS:  $m/z = 387.3004$  ( $M$ )<sup>+</sup>;  $C_{24}H_{39}N_2O_2^+$  requires:  $m/z = 387.3006$  ( $M$ )<sup>+</sup>;  $\nu_{\max}$  3341, 2965, 2885, 2156, 1698, 1606, 1508, 1475, 1456, 1365, 1278, 1247, 1168, 1060, 1019, 953, 860, 782, 732, 706  $cm^{-1}$ .  $^1H$ -NMR (500 MHz,  $CDCl_3$ ):  $\delta$  0.92 (*dd*,  $J = 13.4, 3.5, 1H$ ), 0.97 (*s*, 3H), 1.03 (*s*, 3H), 1.35 (*t*,  $J = 4.8, 1H$ ), 1.39 (*s*, 9H), 1.62 (*t*,  $J = 4.5, 1H$ ), 1.88 – 1.99 (*m*, 2H), 2.29 (*br t*,  $J = 12.9, 1H$ ), 2.46 – 2.56 (*m*, 1H), 3.19 (*s*, 3H), 3.27 (*s*, 3H), 3.43 (*br d*,  $J = 14.3, 1H$ ), 4.16 – 4.26 (*m*, 2H), 4.92 (*d*,  $J = 10.9, 1H$ ), 4.97 (*d*,  $J = 12.4, 1H$ ), 5.21 (*d*,  $J = 12.4, 1H$ ), 7.37 – 7.46 (*m*, 3H), 7.63 (*d*,  $J = 6.9, 2H$ ).  $^{13}C$ -NMR (126 MHz,  $CDCl_3$ ):  $\delta$  19.60, 20.95, 27.47, 28.40, 28.91, 40.49, 43.82, 50.54, 51.73, 53.85, 54.30, 69.39, 70.63, 80.94, 127.79, 129.12, 130.72, 133.57, 156.18.

**1-Benzyl-1-(((1*S*,2*S*,4*R*)-2-((*tert*-butoxycarbonyl)amino)-7,7-dimethylbicyclo[2.2.1]heptan-1-yl)methyl)pyrrolidin-1-ium bromide (**5b**)**

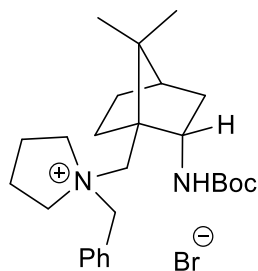

Following *GP2*. Prepared from *tert*-butyl ((1*S*,2*S*,4*R*)-7,7-dimethyl-1-(pyrrolidin-1-ylmethyl)bicyclo[2.2.1]heptan-2-yl)carbamate (**3b**) (2.48 mmol, 828 mg) and benzyl bromide (2.73 mmol, 324  $\mu$ L),  $K_2CO_3$  (2.73 mmol, 377 mg), DMF (13 mL), 25°C, 24 h. Isolation by column chromatography (Silica gel 60, EtOAc/MeOH = 4 : 1). Yield: 469 mg (1.45 mmol, 59%) of brownish semisolid.  $[\alpha]_D^{25} = +17.7$  (0.12, MeOH). EI-HRMS:  $m/z = 413.3161$  ( $M$ )<sup>+</sup>;  $C_{26}H_{41}N_2O_2^+$  requires:  $m/z = 413.3162$  ( $M$ )<sup>+</sup>;  $\nu_{max}$  3323, 3270, 2965, 2923, 1708, 1639, 1531, 1452, 1388, 1363, 1307, 1247, 1159, 1121, 1066, 1028, 1002, 923, 901, 855, 839, 780, 710  $cm^{-1}$ . <sup>1</sup>H-NMR (500 MHz,  $CDCl_3$ ):  $\delta$  0.92 (s, 3H), 0.91 – 0.96 (m, 1H), 0.96 (s, 3H), 1.32 – 1.35 (br t, 1H), 1.37 (s, 9H), 1.55 (t,  $J = 4.5$ , 1H), 1.62 – 1.73 (m, 1H), 1.74 – 1.86 (m, 2H), 1.88 – 2.04 (m, 2H), 2.04 – 2.13 (m, 1H), 2.17 – 2.27 (m, 1H), 2.39 – 2.48 (m, 1H), 3.39 (d,  $J = 14.0$ , 1H), 3.41 – 3.50 (m, 1H), 3.58 – 3.74 (m, 2H), 3.96 (ddd,  $J = 12.3, 8.1, 6.3$ , 1H), 4.13 (d,  $J = 14.0$ , 1H), 4.24 (tt,  $J = 10.8, 3.1$ , 1H), 4.59 (d,  $J = 12.6$ , 1H), 5.22 (br s, 1H), 5.26 (d,  $J = 10.8$ , 1H), 7.28 – 7.39 (m, 3H), 7.57 (d,  $J = 7.0$ , 2H). <sup>13</sup>C-NMR (126 MHz,  $CDCl_3$ ):  $\delta$  19.33, 20.70, 21.60, 22.07, 27.88, 28.29, 28.81, 39.70, 43.63, 51.48, 53.44, 53.74, 59.55, 62.11, 63.58, 67.05, 80.48, 128.21, 128.99, 130.40, 133.30, 156.03.

### Boc deprotection of amines – *General procedure 3 (GP3)*

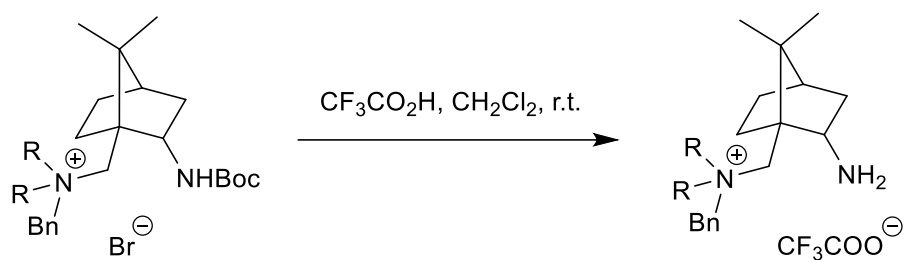

To a solution of amine **5** or **6** in anhydrous CH<sub>2</sub>Cl<sub>2</sub> (2.5 mL/mmol) was added trifluoroacetic acid (2.5 mL/mmol). The resulting reaction mixture was stirred at 25°C for 2 hours. Dichloromethane and trifluoroacetic acid were evaporated *in vacuo* and the residue was dissolved in CH<sub>2</sub>Cl<sub>2</sub> (2.5 mL/mmol). The organic phase was washed with NaOH (aq., 2 M, 2 × 2.5 mL/mmol) and NaCl (aq. sat., 1 × 2.5 mL/mmol). The volatiles were evaporated *in vacuo* to give product **7** or **8**.

**(1*S*,2*S*,4*R*)-1-((Benzyldimethylammonio)methyl)-7,7-dimethylbicyclo[2.2.1]heptan-2-aminium 2,2,2-trifluoroacetate (7a)**

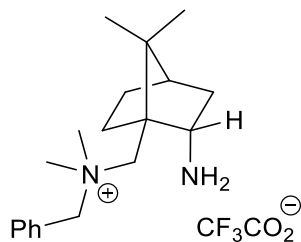

Following *GP3*. Prepared from *N*-benzyl-1-((1*S*,2*S*,4*R*)-2-((*tert*-butoxycarbonyl)amino)-7,7-dimethylbicyclo[2.2.1]heptan-1-yl)-*N,N*-dimethylmethanaminium bromide (**5a**) (2.1 mmol, 1 g), trifluoroacetic acid (5 mL), CH<sub>2</sub>Cl<sub>2</sub> (5 mL), 25°C, 2 h. Volatile components were evaporated *in vacuo*, the residue was dissolved in dichloromethane and washed with NaOH (aq., 2 M) and NaCl (aq. sat.). Yield: 605 mg (1.51 mmol, 72%) of colorless solid, mp = 179.9–182.1°C. [ $\alpha$ ]<sub>D</sub><sup>r.t.</sup> = +16.2 (0.125, MeOH). EI-HRMS:  $m/z$  = 287.2483 (M)<sup>+</sup>; C<sub>19</sub>H<sub>31</sub>N<sub>2</sub><sup>+</sup> requires:  $m/z$  = 287.2482 (M)<sup>+</sup>;  $\nu_{\text{max}}$  3377, 3292, 3042, 2943, 2881, 1685, 1585, 1479, 1457, 1401, 1372, 1302, 1196, 1157, 1113, 1048, 1025, 1010, 989, 935, 917, 881, 854, 819, 780, 785, 753, 733, 716, 707, 632, 607 cm<sup>-1</sup>. <sup>1</sup>H-NMR (500 MHz, CDCl<sub>3</sub>):  $\delta$  0.89 (*dd*,  $J$  = 3.4, 13.1, 1H); 0.93 (*s*, 3H); 0.97 (*s*, 3H); 1.31 – 1.38 (*m*, 1H); 1.61 (*t*,  $J$  = 4.6, 1H); 1.77 – 1.84 (*m*, 1H); 1.86 – 1.96 (*m*, 1H); 2.05 – 2.13 (*m*, 1H); 2.44 – 2.53 (*m*, 1H); 3.28 (*s*, 3H); 3.37 (*s*, 3H); 3.43 – 3.49 (*m*, 1H); 3.68 (*d*,  $J$  = 13.9, 1H); 3.72 (*d*,  $J$  = 13.9, 1H); 4.97 (*d*,  $J$  = 12.4, 1H); 5.11 (*d*,  $J$  = 12.3, 1H); 7.40 – 7.48 (*m*, 3H); 7.56 – 7.60 (*m*, 2H), signal for NH<sub>2</sub> is missing. <sup>13</sup>C-NMR (126 MHz, CDCl<sub>3</sub>):  $\delta$  19.41, 20.51, 26.70, 29.29, 44.19, 44.63, 49.97, 50.49, 52.44, 53.20, 53.69, 69.11, 71.98, 117.64 (*q*,  $J$  = 297.3), 128.29, 129.14, 130.57, 133.49, 161.16 (*q*,  $J$  = 32.7).

**(1*S*,2*R*,4*R*)-1-((Benzyltrimethylammonio)methyl)-7,7-dimethylbicyclo[2.2.1]heptan-2-aminium 2,2,2-trifluoroacetate (8a)**

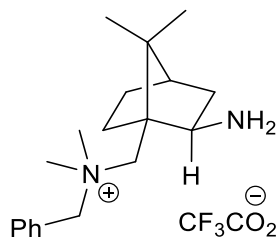

Following *GP3*. Prepared from *N*-benzyl-1-((1*S*,2*R*,4*R*)-2-((*tert*-butoxycarbonyl)amino)-7,7-dimethylbicyclo[2.2.1]heptan-1-yl)-*N,N*-dimethylmethanaminium bromide (**6a**) (1.92 mmol, 900 mg), trifluoroacetic acid (5 mL), CH<sub>2</sub>Cl<sub>2</sub> (5 mL), 25°C, 2 h. Volatile components were evaporated *in vacuo*, the residue was dissolved in dichloromethane and washed with NaOH (aq., 2 M) and NaCl (aq. sat.). Yield: 567 mg (1.41 mmol, 74%) of colorless solid, mp = 157.1–158.8°C.  $[\alpha]_D^{r.t.} = -9.8$  (0.11, MeOH). EI-HRMS:  $m/z = 287.2477$  (M)<sup>+</sup>; C<sub>19</sub>H<sub>31</sub>N<sub>2</sub><sup>+</sup> requires:  $m/z = 287.2482$  (M)<sup>+</sup>;  $\nu_{max}$  2953, 2883, 1684, 1476, 1456, 1393, 1371, 1311, 1196, 1153, 1113, 1035, 1009, 936, 911, 851, 820, 798, 784, 735, 714, 631 cm<sup>-1</sup>. <sup>1</sup>H-NMR (600 MHz, CDCl<sub>3</sub>):  $\delta$  0.86 (s, 3H), 0.90 (s, 3H), 1.15 – 1.22 (m, 1H), 1.34 – 1.41 (m, 1H), 1.50 – 1.55 (m, 1H), 1.67 (s, 1H), 1.77 (d,  $J = 13.9$ , 3H), 1.92 (dd,  $J = 13.0, 7.3$ , 2H), 3.01 (dd,  $J = 9.0, 4.9$ , 1H), 3.19 (s, 6H), 3.33 (d,  $J = 13.5$ , 1H), 4.14 (d,  $J = 13.5$ , 1H), 4.75 (d,  $J = 12.5$ , 1H), 4.86 (d,  $J = 12.8$ , 1H), 7.35 – 7.41 (m, 3H), 7.56 (d,  $J = 7.4$ , 2H). <sup>13</sup>C-NMR (126 MHz, CDCl<sub>3</sub>):  $\delta$  20.58, 21.40, 27.73, 32.27, 44.01, 44.29, 50.60, 51.35, 51.53, 52.44, 57.11, 64.64, 71.26, 117.56 ( $q, J = 296.8$ ), 127.79, 129.26, 130.81, 133.53, 161.25 ( $q, J = 32.7$ ).

**Synthesis of 1-(((1*S*,2*S*,4*R*)-2-ammonio-7,7-dimethylbicyclo[2.2.1]heptan-1-yl)methyl)-1-benzylpyrrolidin-1-ium iodide (7b)**

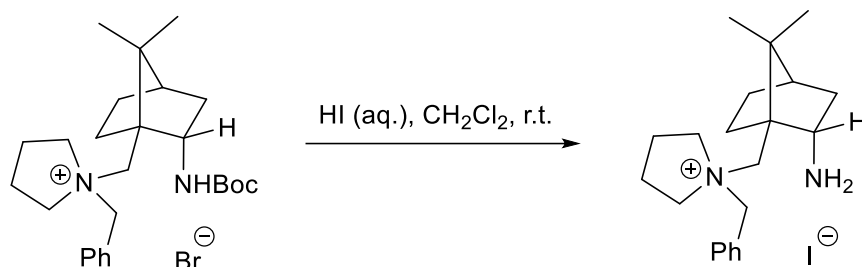

1-Benzyl-1-(((1*S*,2*S*,4*R*)-2-((*tert*-butoxycarbonyl)amino)-7,7-dimethylbicyclo[2.2.1]heptan-1-yl)methyl)pyrrolidin-1-ium bromide (**5b**) (0.55 mmol, 270 mg) was dissolved in anhydrous CH<sub>2</sub>Cl<sub>2</sub> (8 mL), then HI (aq., 48%, 5 equivlents, 2.75 mmol, 495  $\mu$ L) was added. The reaction mixture was stirred for 4 h at 25°C. Volatile components were evaporated *in vacuo*, the residue was dissolved in dichloromethane (5 mL) and washed with NaOH (aq., 2 M, 2  $\times$  5mL) and NaCl (aq. sat., 1  $\times$  5mL). Yield: 150 mg (0.34 mmol, 62%) of yellowish semisolid.  $[\alpha]_D^{25} = +18.8$  (0.15, MeOH). EI-HRMS:  $m/z = 313.2635$  ( $M$ )<sup>+</sup>; C<sub>21</sub>H<sub>33</sub>N<sub>2</sub><sup>+</sup> requires:  $m/z = 313.2635$  ( $M$ )<sup>+</sup>;  $\nu_{\max}$  3273, 2951, 2881, 2188, 2152, 1969, 1594, 1458, 1372, 1303, 1217, 1142, 1077, 1033, 1004, 917, 822, 764, 725, 641 cm<sup>-1</sup>. <sup>1</sup>H-NMR (600 MHz, CDCl<sub>3</sub>):  $\delta$  1.03 – 1.06 (*m*, 1H), 1.06 (*s*, 3H), 1.07 (*s*, 3H), 1.41 – 1.50 (*m*, 1H), 1.67 (*t*, *J* = 4.6, 1H), 1.77 (*td*, *J* = 10.7, 9.7, 6.5, 1H), 1.81 – 1.88 (*m*, 1H), 1.92 – 1.99 (*m*, 1H), 2.05 – 2.11 (*m*, 1H), 2.12 – 2.21 (*m*, 2H), 2.26 (*ddd*, *J* = 13.4, 9.4, 4.1, 1H), 2.36 – 2.75 (*m*, 3H), 3.68 (*dt*, *J* = 10.5, 3.1, 1H), 3.75 (*ddd*, *J* = 12.3, 8.5, 5.9, 1H), 3.81 – 3.87 (*m*, 1H), 3.83 (*d*, *J* = 14.1, 1H), 3.89 (*d*, *J* = 14.2, 1H), 4.07 (*ddd*, *J* = 12.2, 8.3, 6.3, 1H), 4.16 (*ddd*, *J* = 11.9, 8.2, 6.2, 1H), 5.06 (*d*, *J* = 12.6, 1H), 5.25 (*d*, *J* = 12.6, 1H), 7.42 – 7.50 (*m*, 3H), 7.66 (*d*, *J* = 6.6, 2H). <sup>13</sup>C-NMR (151 MHz, CDCl<sub>3</sub>):  $\delta$  19.88, 21.16, 21.96, 22.08, 26.80, 29.23, 42.76, 44.69, 52.63, 53.69, 54.48, 60.85, 61.96, 63.75, 67.23, 128.66, 129.39, 130.71, 133.42.

### Synthesis of phase-transfer bifunctional catalysts – *General procedure 4 (GP4)*

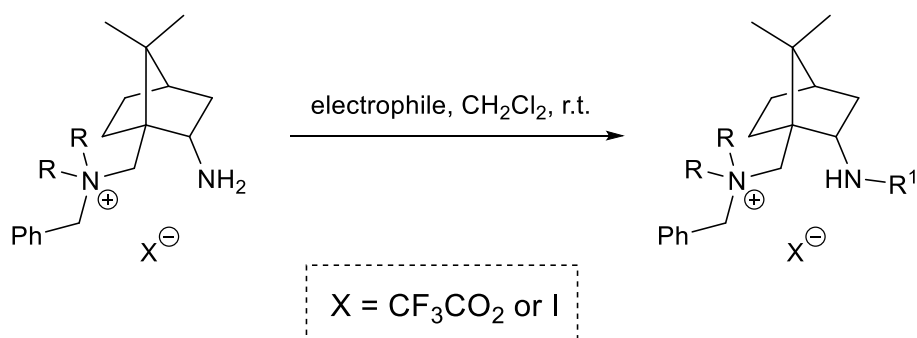

Amine **7** or **8** was dissolved in anhydrous  $\text{CH}_2\text{Cl}_2$ , the appropriate electrophile was added (1.2-1.4 equivalents), and the reaction mixture was stirred for 16 h at room temperature. The volatiles were evaporated *in vacuo*. The residue was purified by column chromatography (CC). The fractions containing product **I–X** were combined and the volatiles were evaporated *in vacuo*.



**Trifluoroacetate anion exchange – *General procedure 5 (GP5)***

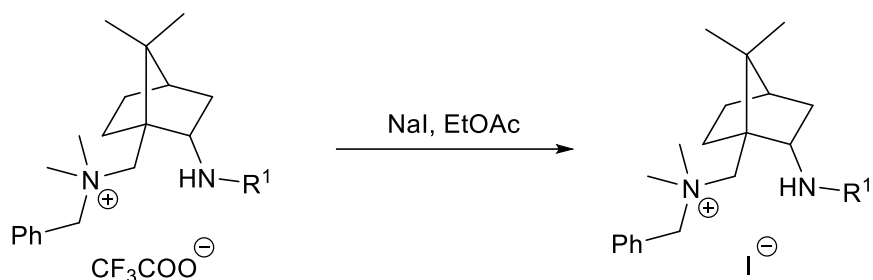

The column was packed with NaI (5 g) and conditioned with ethyl acetate. The trifluoroacetate phase transfer catalyst was dissolved in ethyl acetate and applied to the NaI column. The fractions containing the product were combined and the volatiles were evaporated *in vacuo*. Based on the <sup>19</sup>F NMR spectra (presence of a signal for fluorine from trifluoroacetate anion), the procedure was repeated as necessary.

***N*-Benzyl-1-((1*R*,2*R*,4*R*)-2-(3-(3,5-bis(trifluoromethyl)phenyl)thioureido)-7,7-dimethylbicyclo[2.2.1]heptan-1-yl)-*N,N*-dimethylmethanaminium 2,2,2-trifluoroacetate (I)**

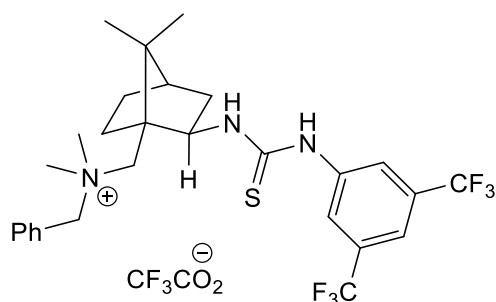

Following *GP4*. Prepared from (1*S*,2*R*,4*R*)-1-((benzyltrimethylammonio)methyl)-7,7-dimethylbicyclo[2.2.1]heptan-2-aminium 2,2,2-trifluoroacetate (**8a**) (0.585 mmol, 300 mg) and 3,5-bis(trifluoromethyl)phenyl isothiocyanate (1.05 mmol, 192  $\mu$ L),  $\text{CH}_2\text{Cl}_2$  (4 mL), 25°C, 16 h. Isolation by evaporation followed by column chromatography (Silica gel 60, EtOAc/MeOH = 4 : 1). Yield: 316 mg (0.47 mmol, 80%) of yellowish solid, mp = 87.5–89.0°C.  $[\alpha]_{\text{D}}^{25} = +6.8$  (0.13, MeOH). EI-HRMS:  $m/z = 558.2374$  ( $\text{M}^+$ );  $\text{C}_{28}\text{H}_{34}\text{F}_6\text{N}_3\text{S}^+$  requires:  $m/z = 558.2372$  ( $\text{M}^+$ );  $\nu_{\text{max}}$  3260, 2962, 2885, 2091, 1679, 1622, 1523, 1472, 1382, 1333, 1274, 1218, 1171, 1125, 999, 970, 883, 848, 828, 780, 760, 727, 700, 680  $\text{cm}^{-1}$ .  $^1\text{H}$ -NMR (500 MHz,  $\text{CDCl}_3$ ):  $\delta$  0.89 (*s*, 3H); 1.18 (*s*, 3H); 1.36 – 1.45 (*m*, 1H); 1.66 – 1.74 (*m*, 1H); 1.81 – 1.94 (*m*, 4H); 2.22 (*dd*,  $J = 8.6, 13.4$ , 1H); 3.00 (*s*, 3H); 3.08 (*s*, 3H); 3.29 (*d*,  $J = 14.5$ , 1H); 4.65 (*d*,  $J = 12.6$ , 1H); 4.74 – 4.80 (*m*, 1H); 4.84 – 4.93 (*m*, 2H); 7.40 – 7.54 (*m*, 6H); 8.36 (*s*, 2H); 8.79 (*d*,  $J = 7.9$ , 1H); 10.97 (*s*, 1H).  $^{13}\text{C}$  NMR (126 MHz,  $\text{CDCl}_3$ ):  $\delta$  20.76, 20.93, 27.84, 34.28, 41.11, 43.92, 50.38, 50.44, 51.25, 53.08, 58.99, 66.90, 71.59, 113.57, 116.74 – 117.00 (*m*), 117.08 (*q*,  $J = 294.0$ ), 122.13 (*d*,  $J = 4.0$ ), 123.41 (*q*,  $J = 272.6$ ), 124.49, 126.58, 129.53, 131.34 (*q*,  $J = 33.2$ ), 131.37, 133.09, 141.70, 162.07 (*q*,  $J = 34.3$ ), 180.02.

***N*-Benzyl-1-((1*R*,2*R*,4*R*)-2-(3-(3,5-bis(trifluoromethyl)phenyl)thioureido)-7,7-dimethylbicyclo[2.2.1]heptan-1-yl)-*N,N*-dimethylmethanaminium iodide (II)**

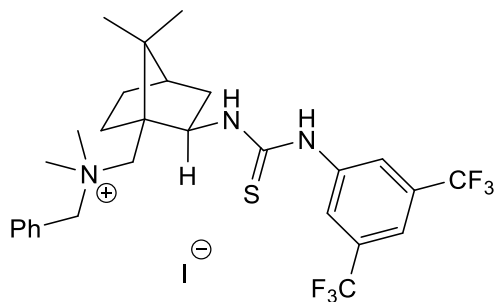

Following GP5. Prepared from *N*-benzyl-1-((1*R*,2*R*,4*R*)-2-(3-(3,5-bis(trifluoromethyl)phenyl)thioureido)-7,7-dimethylbicyclo[2.2.1]heptan-1-yl)-*N,N*-dimethylmethanaminium 2,2,2-trifluoroacetate (**I**) (0.21 mmol, 140 mg), dissolved in ethyl acetate (4 mL) and filtered through a pad of NaI. Volatile components were evaporated *in vacuo*. Yield: 140 mg (0.20 mmol, 96%) of colorless solid, mp = 61.4–62.9°C.  $[\alpha]_{\text{D}}^{25} = +5$  (0.19, MeOH). EI-HRMS:  $m/z = 558.2365$  ( $\text{M}^+$ );  $\text{C}_{28}\text{H}_{34}\text{F}_6\text{N}_3\text{S}^+$  requires:  $m/z = 558.2372$  ( $\text{M}^+$ );  $\nu_{\text{max}}$  3305, 2964, 1674, 1536, 1473, 1384, 1336, 1275, 1172, 1123, 1000, 971, 884, 846, 801, 780, 759, 725, 701, 679  $\text{cm}^{-1}$ .  $^1\text{H}$ -NMR (500 MHz,  $\text{CDCl}_3$ ):  $\delta$  0.96 (s, 3H); 1.28 (s, 3H); 1.39 – 1.46 (m, 1H); 1.64 – 1.73 (m, 1H); 1.81 – 2.01 (m, 4H); 2.23 (dd,  $J = 8.8, 13.4$ , 1H); 3.08 (s, 3H); 3.14 (s, 3H); 3.51 (d,  $J = 14.3$ , 1H); 4.81 – 4.89 (m, 1H); 4.96 (d,  $J = 12.5$ , 1H); 5.07 (d,  $J = 13.9$ , 1H); 5.17 (d,  $J = 12.7$ , 1H); 7.38 – 7.45 (m, 2H); 7.46 – 7.51 (m, 1H); 7.54 (s, 1H); 7.55 – 7.60 (m, 2H); 8.08 (d,  $J = 8.1$ , 1H); 8.43 (s, 2H); 10.52 (s, 1H).  $^{13}\text{C}$ -NMR (126 MHz,  $\text{CDCl}_3$ ):  $\delta$  21.37, 21.94, 27.90, 34.23, 41.04, 43.83, 50.02, 50.70, 51.55, 53.44, 59.26, 66.70, 70.85, 117.35, 122.27, 123.36 (q,  $J = 272.7$ ), 126.56, 129.49, 131.36, 131.36 (q,  $J = 33.3$ ), 133.31, 141.23, 179.91.

**1-Benzyl-1-(((1*S*,2*S*,4*R*)-2-(3-(3,5-bis(trifluoromethyl)phenyl)thioureido)-7,7-dimethylbicyclo[2.2.1]heptan-1-yl)methyl)pyrrolidin-1-ium iodide (III)**

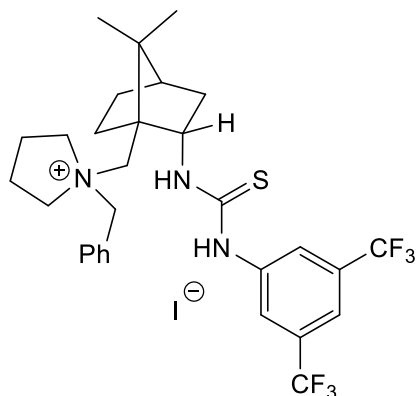

Following *GP4*. Prepared from 1-(((1*S*,2*S*,4*R*)-2-amino-7,7-dimethylbicyclo[2.2.1]heptan-1-yl)methyl)-1-benzylpyrrolidin-1-ium iodide (**7b**) (0.34 mmol, 150 mg) and 3,5-bis(trifluoromethyl)phenyl isothiocyanate (0.68 mmol, 124  $\mu$ L),  $\text{CH}_2\text{Cl}_2$  (3 mL), 25°C, 16 h. Isolation by column chromatography (Silica gel 60, EtOAc/MeOH = 10 : 1). Yield: 99 mg (0.14 mmol, 41%) of brownish semisolid.  $[\alpha]_{\text{D}}^{25} = +20$  (0.047, MeOH). EI-HRMS:  $m/z = 584.2519$  ( $\text{M}^+$ );  $\text{C}_{30}\text{H}_{36}\text{F}_6\text{N}_3\text{S}^+$  requires:  $m/z = 584.2529$  ( $\text{M}^+$ );  $\nu_{\text{max}}$  3194, 3126, 2968, 2149, 1625, 1589, 1542, 1492, 1472, 1381, 1324, 1271, 1249, 1222, 1166, 1136, 1108, 1094, 1061, 1025, 999, 967, 909, 885, 847, 756, 721, 701, 679, 612  $\text{cm}^{-1}$ .  $^1\text{H}$ -NMR (500 MHz,  $\text{CDCl}_3$ ):  $\delta$  1.03 (s, 3H); 1.06 (s, 3H); 1.15 (dd,  $J = 13.4, 3.9$ , 1H); 1.51 – 1.93 (m, 5H); 1.98 – 2.06 (m, 1H); 2.16 – 2.31 (m, 2H); 2.61 – 2.70 (m, 1H); 2.99 – 3.07 (m, 1H); 3.41 – 3.51 (m, 2H); 3.67 – 3.83 (m, 3H); 3.83 – 3.93 (m, 1H); 4.63 (d,  $J = 12.9$ , 1H); 4.96 (d,  $J = 12.8$ , 1H); 5.34 – 5.45 (m, 1H); 7.39 – 7.45 (m, 2H); 7.47 – 7.52 (m, 1H); 7.54 – 7.58 (m, 2H); 7.60 (s, 1H); 8.34 – 8.43 (m, 3H); 10.67 (s, 1H).  $^{13}\text{C}$ -NMR (126 MHz,  $\text{CDCl}_3$ ):  $\delta$  19.98, 20.65, 21.49, 21.93, 28.65, 29.57, 38.39, 43.68, 51.83, 54.54, 57.00, 60.89, 61.91, 64.34, 67.34, 117.85 – 118.26 (m), 123.08 – 123.29 (m), 123.38 (q,  $J = 209.2$ ), 127.38, 129.67, 131.28, 131.57 (q,  $J = 33.4$ ), 133.39, 140.92, 182.20.

***N*-Benzyl-1-((1*R*,2*S*,4*R*)-2-(3-(3,5-bis(trifluoromethyl)phenyl)thioureido)-7,7-dimethylbicyclo[2.2.1]heptan-1-yl)-*N,N*-dimethylmethanaminium 2,2,2-trifluoroacetate (IV)**

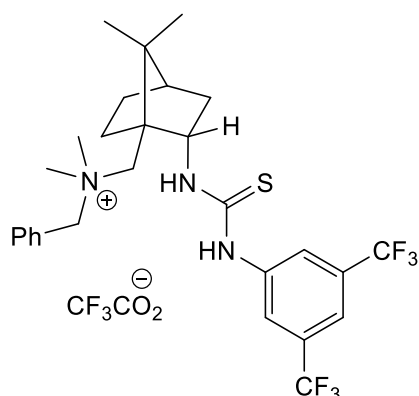

Following *GP4*. Prepared from (1*S*,2*S*,4*R*)-1-((benzyl dimethylammonio)methyl)-7,7-dimethylbicyclo[2.2.1]heptan-2-aminium 2,2,2-trifluoroacetate (**7a**) (0.39 mmol, 200 mg) and 3,5-bis(trifluoromethyl)phenyl isothiocyanate (0.70 mmol, 128  $\mu$ L), CH<sub>2</sub>Cl<sub>2</sub> (4 mL), 25°C, 16 h. Isolation by column chromatography (Silica gel 60, EtOAc/MeOH = 4 : 1). Yield: 250 mg (0.37 mmol, 95%) of colorless solid, mp = 153–155°C. [ $\alpha$ ]<sub>D</sub><sup>25</sup> = +2.1 (0.11, MeOH). EI-HRMS:  $m/z$  = 558.2363 (M)<sup>+</sup>; C<sub>28</sub>H<sub>34</sub>F<sub>6</sub>N<sub>3</sub>S<sup>+</sup> requires:  $m/z$  = 558.2372 (M)<sup>+</sup>;  $\nu_{\max}$  3275, 3247, 3047, 2961, 2890, 1682, 1542, 1473, 1385, 1278, 1177, 1132, 966, 887, 848, 801, 719, 702, 680 cm<sup>-1</sup>. <sup>1</sup>H-NMR (500 MHz, CDCl<sub>3</sub>):  $\delta$  0.97 (s, 3H), 1.05 (s, 3H), 1.10 (*dd*,  $J$  = 13.4, 3.7, 1H), 1.51 (*ddd*,  $J$  = 13.4, 9.2, 4.7, 1H), 1.73 (*t*,  $J$  = 4.6, 1H), 1.78 – 1.89 (*m*, 1H), 1.95 – 2.12 (*m*, 1H), 2.59 – 2.67 (*m*, 1H), 2.68 – 2.76 (*m*, 1H), 3.03 (s, 3H), 3.04 (s, 3H), 3.47 (*d*,  $J$  = 13.7, 1H), 3.72 (*d*,  $J$  = 13.7, 1H), 4.55 (*d*,  $J$  = 12.6, 1H), 4.71 (*d*,  $J$  = 12.6, 1H), 5.22 (*tt*,  $J$  = 10.2, 3.0, 1H), 7.34 – 7.40 (*m*, 4H), 7.43 – 7.48 (*m*, 1H), 7.53 (s, 1H), 8.29 (s, 2H), 8.91 (*d*,  $J$  = 9.8, 1H), 11.09 (s, 1H). <sup>13</sup>C-NMR (126 MHz, CDCl<sub>3</sub>):  $\delta$  19.81, 20.25, 28.05, 28.57, 38.68, 43.75, 50.78, 51.03, 51.76, 54.43, 56.70, 69.58, 73.03, 117.02 (*q*,  $J$  = 294.4), 117.24 – 117.53 (*m*), 122.72 (*d*,  $J$  = 3.4), 123.39 (*q*,  $J$  = 272.7), 126.96, 129.47, 131.24, 131.48 (*q*,  $J$  = 33.4), 133.03, 141.44, 161.62 (*q*,  $J$  = 34.1), 181.96.

***N*-Benzyl-1-((1*R*,2*S*,4*R*)-2-(3-(3,5-bis(trifluoromethyl)phenyl)thioureido)-7,7-dimethylbicyclo[2.2.1]heptan-1-yl)-*N,N*-dimethylmethanaminium iodide (V)**

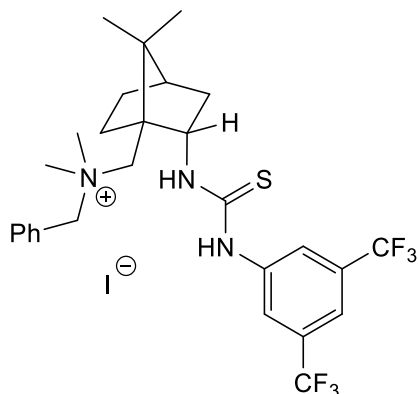

Following *GP5*. Prepared from *N*<sup>1</sup>-((*S*)-(6-methoxyquinolin-4-yl)((1*S*,2*S*,4*S*,5*R*)-5-vinylquinuclidin-2-yl)methyl)-4-(trifluoromethyl)benzene-1,2-diamine (**IV**) (0.17 mmol, 116 mg), dissolved in ethyl acetate (3 mL) and filtered through a pad of NaI. Volatile components were evaporated *in vacuo*. Yield: 109 mg (0.16 mmol, 92%) of white solid, mp = decomposition above 350°C.  $[\alpha]_{\text{D}}^{25} = +69.2$  (0.013, MeOH). EI-HRMS:  $m/z = 558.2368$  ( $\text{M}^+$ );  $\text{C}_{28}\text{H}_{34}\text{F}_6\text{N}_3\text{S}^+$  requires:  $m/z = 558.2372$  ( $\text{M}^+$ );  $\nu_{\text{max}}$  3247, 2960, 2928, 2857, 2175, 2163, 2135, 2034, 1996, 1954, 1722, 1595, 1534, 1473, 1385, 1277, 1177, 1135, 965, 887, 730, 701, 680  $\text{cm}^{-1}$ .  $^1\text{H-NMR}$  (500 MHz,  $\text{DMSO-}d_6$ ):  $\delta$  0.98 (*s*, 3H), 1.02 (*dd*,  $J = 13.0, 3.7$ , 1H), 1.05 (*s*, 3H), 1.43 – 1.52 (*m*, 1H), 1.72 (*t*,  $J = 4.4$ , 1H), 1.90 – 2.06 (*m*, 2H), 2.16 – 2.24 (*m*, 1H), 2.45 – 2.49 (*m*, 1H), 2.95 (*s*, 3H), 2.99 (*s*, 3H), 3.60 (*d*,  $J = 14.1$ , 1H), 3.71 (*d*,  $J = 14.0$ , 1H), 4.52 – 4.63 (*m*, 2H), 5.04 – 5.12 (*m*, 1H), 7.43 – 7.59 (*m*, 5H), 7.81 (*s*, 1H), 8.28 (*s*, 2H), 8.38 (*d*,  $J = 9.8$ , 1H), 10.32 (*s*, 1H).  $^{13}\text{C-NMR}$  (126 MHz,  $\text{DMSO-}d_6$ ):  $\delta$  19.25, 20.04, 26.97, 28.11, 38.10, 42.97, 49.08, 50.46, 51.23, 53.88, 56.13, 67.81, 70.46, 116.76 – 117.00 (*m*), 122.27 – 122.44 (*m*), 123.17 (*q*,  $J = 272.8$ ), 128.03, 128.86, 130.17 (*q*,  $J = 32.8$ ), 130.38, 133.06, 141.46, 181.00.

***N*-Benzyl-1-((1*R*,2*S*,4*R*)-7,7-dimethyl-2-(3-phenylthioureido)bicyclo[2.2.1]heptan-1-yl)-*N,N*-dimethylmethanaminium 2,2,2-trifluoroacetate (VI)**

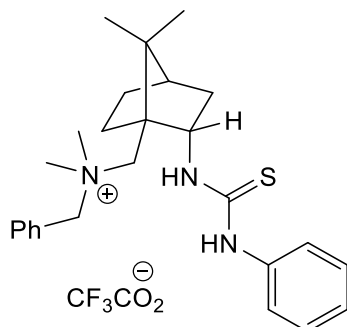

Following *GP4*. Prepared from (1*S*,2*S*,4*R*)-1-((benzyltrimethylammonio)methyl)-7,7-dimethylbicyclo[2.2.1]heptan-2-aminium 2,2,2-trifluoroacetate (**7a**) (0.39 mmol, 200 mg) and phenyl isothiocyanate (0.70 mmol, 84  $\mu$ L), CH<sub>2</sub>Cl<sub>2</sub> (4 mL), 25°C, 16 h. Isolation by evaporation followed by column chromatography (Silica gel 60, EtOAc/MeOH = 4 : 1). Yield: 119 mg (0.22 mmol, 56 %) of colorless solid, mp = 180–183°C.  $[\alpha]_{\text{D}}^{25} = +6.7$  (0.06, MeOH). EI-HRMS:  $m/z = 422.2618$  ( $\text{M}^+$ ); C<sub>26</sub>H<sub>36</sub>N<sub>3</sub>S<sup>+</sup> requires:  $m/z = 422.2624$  ( $\text{M}^+$ );  $\nu_{\text{max}}$  3244, 2959, 2884, 1683, 1540, 1507, 1489, 1473, 1457, 1362, 1317, 1202, 1148, 1056, 1033, 851, 801, 727 cm<sup>-1</sup>. <sup>1</sup>H-NMR (500 MHz, CDCl<sub>3</sub>):  $\delta$  0.96 (s, 3H); 1.04 (s, 3H); 1.08 (dd,  $J = 13.3, 3.7$ , 1H); 1.45 – 1.53 (m, 1H); 1.67 – 1.79 (m, 2H); 1.96 – 2.06 (m, 1H); 2.57 – 2.65 (m, 1H); 2.67 – 2.76 (m, 1H); 2.98 (s, 3H); 3.03 (s, 3H); 3.41 (d,  $J = 13.6$ , 1H); 3.73 (d,  $J = 13.8$ , 1H); 4.54 (d,  $J = 12.5$ , 1H); 4.79 (d,  $J = 12.4$ , 1H), 5.24 – 5.31 (m, 1H), 7.04 – 7.10 (m, 1H); 7.22 – 7.29 (m, 2H); 7.33 – 7.47 (m, 5H); 7.60 – 7.68 (m, 2H); 8.64 (d,  $J = 9.9$ , 1H); 10.45 (s, 1H). <sup>13</sup>C-NMR (126 MHz, CDCl<sub>3</sub>):  $\delta$  19.95, 20.50, 28.53, 28.65, 38.67, 43.85, 51.11, 51.22, 51.72, 54.34, 56.50, 69.08, 72.83, 123.82, 124.84, 127.30, 128.46, 129.38, 130.98, 133.35, 139.65, 182.21 (two signals missing).

***N*-Benzyl-1-((1*R*,2*S*,4*R*)-7,7-dimethyl-2-(3-phenylureido)bicyclo[2.2.1]heptan-1-yl)-*N,N*-dimethylmethanaminium 2,2,2-trifluoroacetate (VII)**

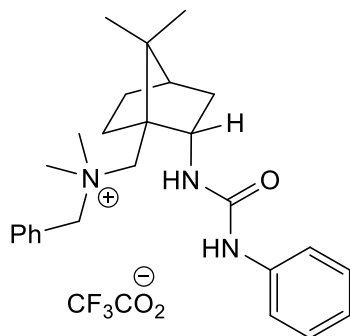

Following *GP4*. Prepared from (1*S*,2*S*,4*R*)-1-((benzyltrimethylammonio)methyl)-7,7-dimethylbicyclo[2.2.1]heptan-2-aminium 2,2,2-trifluoroacetate (**7a**) (0.39 mmol, 200 mg) and phenyl isocyanate (0.69 mmol, 76  $\mu$ L),  $\text{CH}_2\text{Cl}_2$  (4 mL), 25°C, 16 h. Isolation by evaporation followed by column chromatography (Silica gel 60, EtOAc/MeOH = 5 : 1). Yield: 57 mg (0.11 mmol, 28%) of colorless solid, mp = 120.0–123.8°C.  $[\alpha]_{\text{D}}^{25} = +5$  (0.08, MeOH). EI-HRMS:  $m/z = 406.2850$  ( $\text{M}^+$ );  $\text{C}_{26}\text{H}_{36}\text{N}_3\text{O}^+$  requires:  $m/z = 406.2853$  ( $\text{M}^+$ );  $\nu_{\text{max}}$  3261, 2960, 2886, 2150, 1683, 1598, 1550, 1489, 1457, 1313, 1202, 1139, 846, 801, 727, 702  $\text{cm}^{-1}$ .  $^1\text{H}$ -NMR (500 MHz,  $\text{CDCl}_3$ ):  $\delta$  0.95 (*s*, 3H), 1.00 (*s*, 3H), 1.12 (*dd*,  $J = 13.3, 3.6$ , 1H), 1.44 – 1.53 (*m*, 1H), 1.55 – 1.68 (*m*, 2H), 2.03 – 2.11 (*m*, 1H), 2.47 – 2.55 (*m*, 1H), 2.60 – 2.67 (*m*, 1H), 3.04 (*s*, 3H), 3.08 (*s*, 3H), 3.36 (*d*,  $J = 13.7$ , 1H), 3.88 (*d*,  $J = 13.7$ , 1H), 4.52 – 4.59 (*m*, 1H), 4.73 (*d*,  $J = 12.4$ , 1H), 4.97 (*d*,  $J = 12.3$ , 1H), 6.91 – 6.98 (*m*, 1H), 7.18 – 7.24 (*m*, 2H), 7.25 – 7.30 (*m*, 3H), 7.35 – 7.40 (*m*, 1H), 7.42 – 7.47 (*m*, 2H), 7.51 – 7.57 (*m*, 2H), 9.31 (*s*, 1H).  $^{13}\text{C}$ -NMR (126 MHz,  $\text{CDCl}_3$ ):  $\delta$  19.71, 20.51, 28.46, 28.68, 39.90, 44.00, 50.46, 51.29, 51.76, 52.02, 54.06, 68.41, 72.90, 117.34 (*d*,  $J = 295.3$ ), 118.79, 122.19, 127.49, 128.82, 129.24, 130.75, 133.32, 139.93, 156.51, 161.52 (*q*,  $J = 33.5$ ).



***N*-Benzyl-1-((1*R*,2*S*,4*R*)-7,7-dimethyl-2-(3-phenylureido)bicyclo[2.2.1]heptan-1-yl)-*N,N*-dimethylmethanaminium iodide (VIII)**

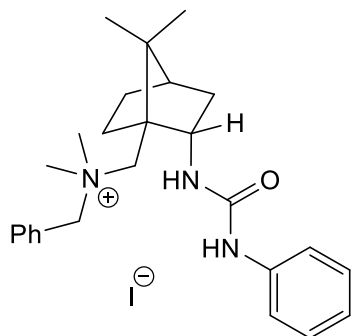

Following GP5. Prepared from *N*-benzyl-1-((1*R*,2*S*,4*R*)-7,7-dimethyl-2-(3-phenylureido)bicyclo[2.2.1]heptan-1-yl)-*N,N*-dimethylmethanaminium 2,2,2-trifluoroacetate (VII) (0.26 mmol, 139 mg), dissolved in ethyl acetate (5 mL) and filtered through a pad of NaI. All volatile components were evaporated *in vacuo*. Yield: 111 mg (0.21 mmol, 80%) of colorless solid, mp = 153–155°C.  $[\alpha]_{\text{D}}^{25} = +78$  (0.073, MeOH). EI-HRMS:  $m/z = 406.2850$  (M)<sup>+</sup>; C<sub>26</sub>H<sub>36</sub>N<sub>3</sub>O<sup>+</sup> requires:  $m/z = 406.2853$  (M)<sup>+</sup>;  $\nu_{\text{max}}$  3277, 2967, 2881, 1678, 1597, 1543, 1487, 1442, 1377, 1311, 1217, 1158, 1128, 1030, 949, 852, 816, 753, 729, 694 cm<sup>-1</sup>. <sup>1</sup>H-NMR (500 MHz, CDCl<sub>3</sub>):  $\delta$  1.01 (s, 6H), 1.14 (dd,  $J = 13.3; 3.6$ , 1H), 1.46 – 1.60 (m, 2H), 1.62 (t,  $J = 4.5$ , 1H), 2.23 – 2.31 (m, 1H), 2.48 – 2.56 (m, 1H), 2.67 – 2.76 (m, 1H), 3.08 (s, 3H), 3.11 (s, 3H), 3.34 (d,  $J = 13.7$ , 1H), 4.07 (d,  $J = 13.6$ , 1H), 4.54 – 4.65 (m, 1H), 4.80 (d,  $J = 12.3$ , 1H), 5.05 (d,  $J = 12.3$ , 1H), 6.75 (d,  $J = 10.8$ , 1H), 6.94 – 7.00 (m, 1H), 7.19 – 7.25 (m, 2H), 7.31 (t,  $J = 7.6$ , 2H), 7.38 – 7.43 (m, 1H), 7.48 – 7.53 (m, 2H), 7.56 – 7.62 (m, 2H), 8.93 (s, 1H). <sup>13</sup>C-NMR (126 MHz, CDCl<sub>3</sub>):  $\delta$  19.88, 20.81, 28.41, 29.13, 39.96, 44.02, 50.51, 51.57, 51.95, 52.34, 54.45, 68.01, 72.56, 118.82, 122.49, 127.33, 128.83, 129.29, 130.86, 133.38, 139.60, 156.34.

***N*-Benzyl-1-((1*R*,2*S*,4*R*)-2-((2-((3,5-bis(trifluoromethyl)phenyl)amino)-3,4-dioxocyclobut-1-en-1-yl)amino)-7,7-dimethylbicyclo[2.2.1]heptan-1-yl)-*N,N*-dimethylmethanaminium 2,2,2-trifluoroacetate (IX)**

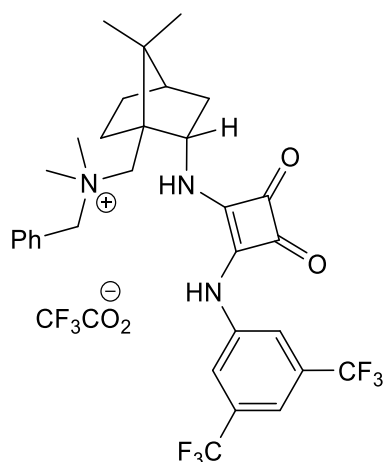

Following *GP4*. Prepared from (1*S*,2*S*,4*R*)-1-((benzyltrimethylammonio)methyl)-7,7-dimethylbicyclo[2.2.1]heptan-2-aminium 2,2,2-trifluoroacetate (**7a**) (0.19 mmol, 100 mg) and 3-((3,5-bis(trifluoromethyl)phenyl)amino)-4-ethoxycyclobut-3-ene-1,2-dione (0.30 mmol, 106.4 mg), CH<sub>2</sub>Cl<sub>2</sub> (2 mL), 25°C, 16 h. Isolation by evaporation followed by column chromatography (Silica gel 60, EtOAc/MeOH = 4 : 1). Yield: 106 mg (0.15 mmol, 75%) of colorless solid, mp = 148.9–150.1°C.  $[\alpha]_D^{25} = +65$  (0.006, MeOH). EI-HRMS:  $m/z = 594.2545$  (M)<sup>+</sup>; C<sub>31</sub>H<sub>34</sub>F<sub>6</sub>N<sub>3</sub>O<sub>2</sub> requires:  $m/z = 594.2550$  (M)<sup>+</sup>;  $\nu_{\max}$  3420, 3153, 3034, 2967, 2888, 1791, 1686, 1603, 1551, 1475, 1427, 1377, 1276, 1176, 1127, 948, 931, 880, 848, 831, 730, 701, 684, 666 cm<sup>-1</sup>. <sup>1</sup>H-NMR (500 MHz, CDCl<sub>3</sub>):  $\delta$  1.02 (s, 3H), 1.17 (s, 3H), 1.35 (dd,  $J = 13.2, 3.6$ , 1H), 1.60 – 1.66 (m, 1H), 1.77 (t,  $J = 4.5$ , 1H), 1.89 (br t,  $J = 13.3$ , 1H), 1.93 – 2.05 (m, 1H), 2.52 – 2.62 (m, 1H), 3.01 (s, 1H), 3.14 (s, 3H), 3.16 (s, 3H), 3.42 (d,  $J = 13.8$ , 1H), 4.33 (d,  $J = 13.9$ , 1H), 4.63 (d,  $J = 12.5$ , 1H), 4.76 (d,  $J = 12.5$ , 1H), 5.27 (t,  $J = 9.9$ , 1H), 7.41 (t,  $J = 7.4$ , 2H), 7.45 – 7.50 (m, 2H), 7.55 – 7.66 (m, 2H), 8.21 (s, 2H), 9.13 (d,  $J = 9.2$ , 1H), 11.34 (s, 1H). <sup>13</sup>C-NMR (126 MHz, CDCl<sub>3</sub>):  $\delta$  19.80, 20.66, 26.61, 28.93, 41.29, 44.05, 50.80, 51.47, 52.79, 55.04, 58.56, 70.65, 73.17, 116.24, 119.01, 123.33 ( $q$ ,  $J = 272.9$ ), 126.85, 129.59, 131.38, 132.65 ( $q$ ,  $J = 33.4$ ), 133.40, 140.74, 165.81, 169.02, 181.07, 185.00. (two carbon missing).

**1-Benzyl-1-(((1*S*,2*S*,4*R*)-7,7-dimethyl-2-(3-phenylthioureido)bicyclo[2.2.1]heptan-1-yl)methyl)pyrrolidin-1-ium iodide (X)**

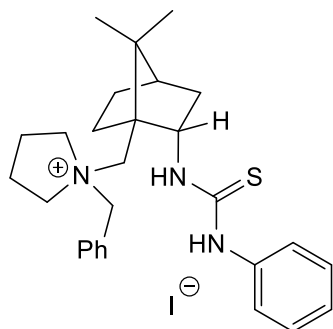

Following *GP4*. Prepared from 1-(((1*S*,2*S*,4*R*)-2-amino-7,7-dimethylbicyclo[2.2.1]heptan-1-yl)methyl)-1-benzylpyrrolidin-1-ium iodide (**7b**) (0.25 mmol, 109 mg) and phenyl isothiocyanate (0.38 mmol, 45  $\mu$ L), CH<sub>2</sub>Cl<sub>2</sub> (2 mL), 25°C, 16 h. Isolation by column chromatography (Silica gel 60, EtOAc/MeOH = 10 : 1). Yield: 72 mg (0.13 mmol, 50%) of colorless solid, mp = 178–180 °C.  $[\alpha]_{\text{D}}^{25} = +7.4$  (0.14, MeOH). EI-HRMS:  $m/z = 448.2776$  (M)<sup>+</sup>; C<sub>28</sub>H<sub>38</sub>N<sub>3</sub>S requires:  $m/z = 448.2781$  (M)<sup>+</sup>;  $\nu_{\text{max}}$  3209, 3030, 2953, 1685, 1597, 1528, 1495, 1450, 1360, 1308, 1243, 1144, 1089, 1027, 1002, 915, 758, 716, 698, 607 cm<sup>-1</sup>. <sup>1</sup>H-NMR (500 MHz, CDCl<sub>3</sub>):  $\delta$  0.99 (s, 3H), 1.02 (s, 3H), 1.12 (dd,  $J = 13.4, 3.9$ , 1H), 1.42 – 1.52 (m, 2H), 1.65 (t,  $J = 4.3$ , 1H), 1.71 – 1.89 (m, 2H), 1.96 – 2.07 (m, 1H), 2.15 – 2.23 (m, 2H), 2.53 – 2.64 (br t,  $J = 11.8$ , 1H), 2.97 (br s, 1H), 3.40 (d,  $J = 13.9$ , 1H), 3.42 – 3.48 (m, 1H), 3.70 (dt,  $J = 12.3, 7.4$ , 1H), 3.81 (d,  $J = 13.8$ , 1H), 3.83 – 3.99 (m, 2H), 4.64 (d,  $J = 12.7$ , 1H), 5.12 (d,  $J = 12.7$ , 1H), 5.40 (br t,  $J = 10.6$ , 1H), 7.14 (t,  $J = 7.3$ , 1H), 7.31 (t,  $J = 7.6$ , 2H), 7.41 (t,  $J = 7.4$ , 2H), 7.46 (t,  $J = 7.3$ , 1H), 7.60 (d,  $J = 6.8$ , 2H), 7.76 (d,  $J = 7.2$ , 2H), 8.10 (d,  $J = 10.4$ , 1H), 10.10 (s, 1H). <sup>13</sup>C-NMR (126 MHz, CDCl<sub>3</sub>):  $\delta$  19.98, 20.70, 21.34, 22.00, 28.48, 29.80, 38.39, 43.70, 51.66, 54.42, 56.54, 60.24, 62.02, 63.82, 67.18, 123.99, 125.16, 127.84, 128.55, 129.49, 130.93, 133.61, 139.32, 182.27.

## 2. HPLC data

### Evaluation of organocatalysts I–IX in the fluorination of $\beta$ -keto ester 9

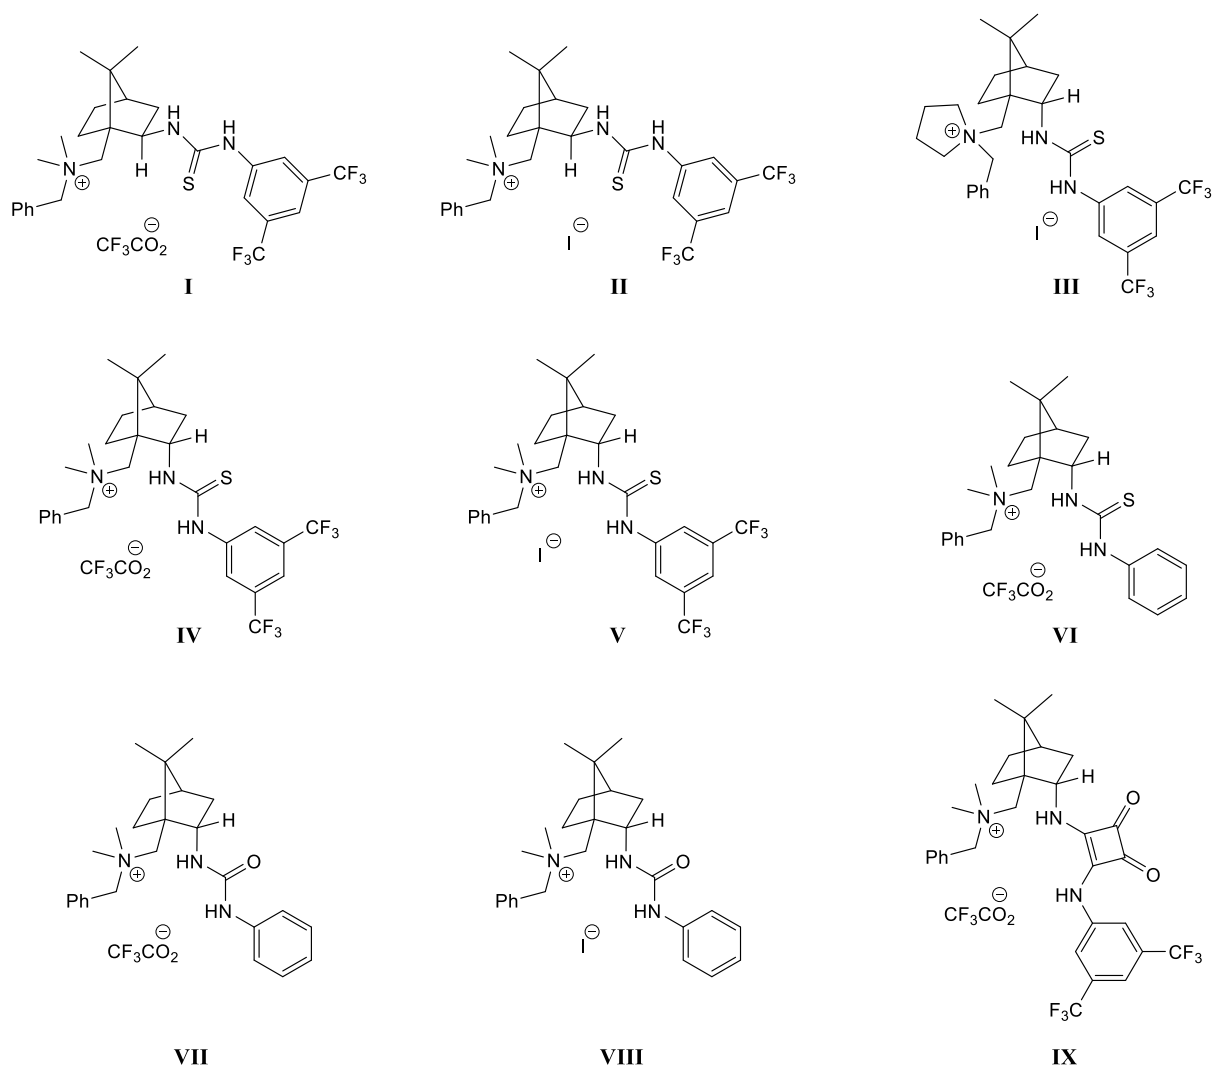

**Figure S1.** Applied organocatalysts I–IX.

**Table S1.** Evaluation of organocatalysts **I–IX** in the fluorination of  $\beta$ -keto ester **9**.<sup>2,3 [a]</sup>

| 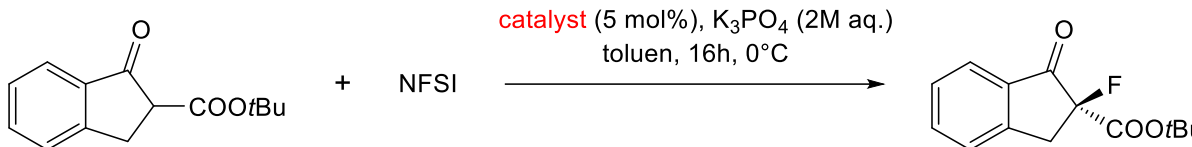 |             |                          |                              |
|------------------------------------------------------------------------------------|-------------|--------------------------|------------------------------|
| Entry                                                                              | Catalyst    | Yield <sup>[b]</sup> (%) | <i>ee</i> <sup>[c]</sup> (%) |
| 1                                                                                  | <b>I</b>    | 63                       | 3 ( <i>S</i> )               |
| 2                                                                                  | <b>II</b>   | 96                       | 9 ( <i>S</i> )               |
| 3                                                                                  | <b>III</b>  | 38                       | 18 ( <i>S</i> )              |
| 4                                                                                  | <b>IV</b>   | 96                       | 1 ( <i>R</i> )               |
| 5                                                                                  | <b>V</b>    | 94                       | 3 ( <i>R</i> )               |
| 6                                                                                  | <b>VI</b>   | 58                       | 5 ( <i>S</i> )               |
| 7                                                                                  | <b>VII</b>  | 71                       | 5 ( <i>S</i> )               |
| 8                                                                                  | <b>VIII</b> | 87                       | 29 ( <i>S</i> )              |
| 9                                                                                  | <b>IX</b>   | 90                       | 18 ( <i>S</i> )              |

[a] Aqueous K<sub>3</sub>PO<sub>4</sub> (2 M, 2 equivalents, 0.1 mL) was added to a mixture of  $\beta$ -keto ester **9** (0.1 mmol, 24.4 mg,  $\omega$  = 95%) and organocatalyst **I–IX** (2 mol%) in toluene (2 mL) under argon atmosphere. Mixture was cooled to –10°C and NFSI (1.1 equivalents, 34.7 mg) was added in two portions over 2 h. The reaction mixture was stirred for another 12 h at –10°C. After completion, the reaction was quenched by addition of NH<sub>4</sub>Cl (aq. sat, 4 mL) and extracted with CH<sub>2</sub>Cl<sub>2</sub> (10 mL). The organic phase was dried over anhydrous Na<sub>2</sub>SO<sub>4</sub>, filtered, and the volatiles were evaporated *in vacuo*. The residue was purified by column chromatography (Silica gel 60, EtOAc/*n*-Heptane = 1 : 15). [b] Reaction yield determined after isolation with column chromatography (Silica gel 60, EtOAc/Heptane = 1 : 15). [c] *ee* determined by HPLC

(Chiralpak AD-H, *n*-Hexane/*i*-PrOH = 200:1, flow rate 0.75 mL/min,  $\lambda$  = 250 nm, 10°C) after the isolation by column chromatography.

Table S1, Entry 1

| Catalyst                                                                                                        | Yield (%) | ee (%) |
|-----------------------------------------------------------------------------------------------------------------|-----------|--------|
| <p>1   <b>I</b></p> 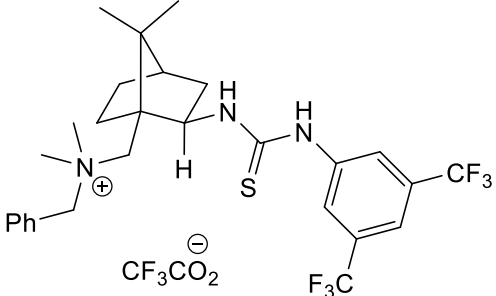 <p>63</p> | 63        | 3 (S)  |

HPLC: Chiralpak AD-H, *n*-Hexane/*i*PrOH = 200:1, flow rate 0.75 mL/min,  $\lambda$  = 250 nm, 10°C

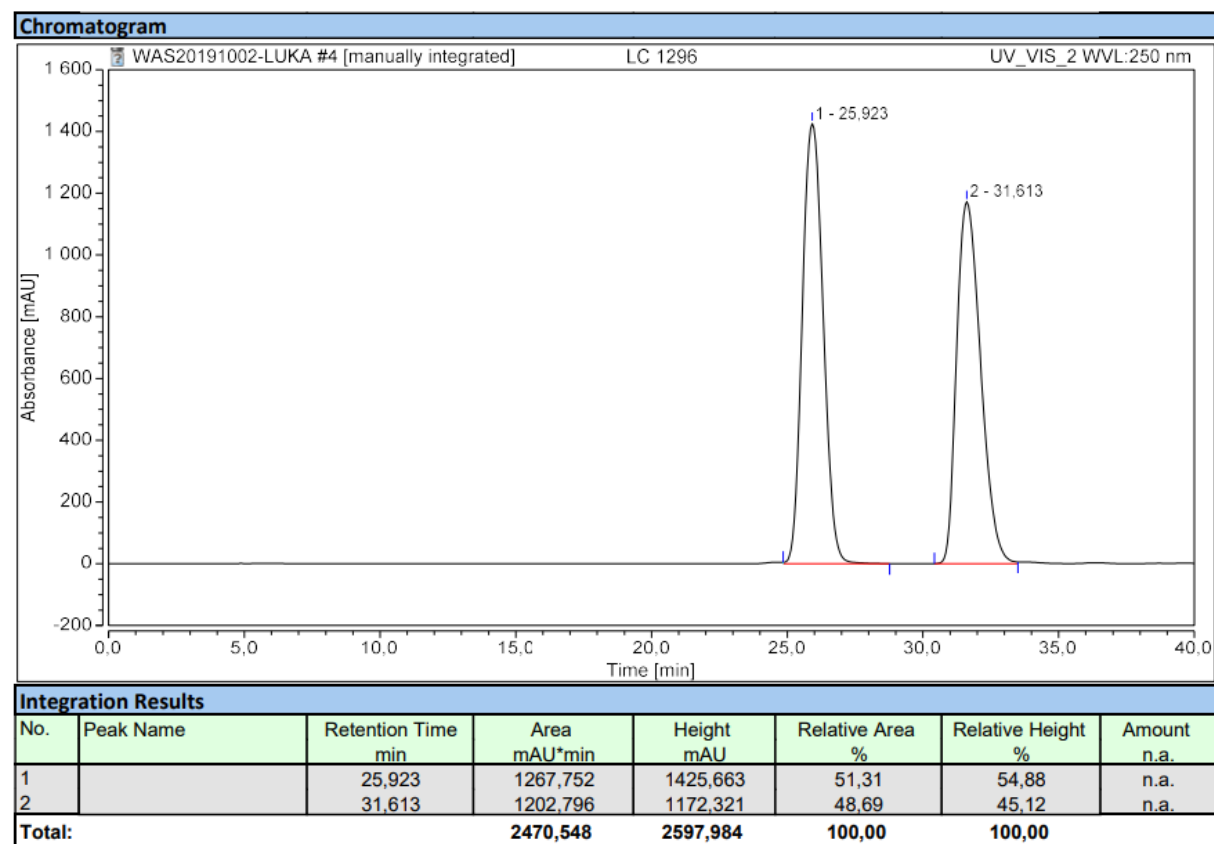

**Table S1, Entry 2**

| Catalyst |                                                                                   | Yield (%) | ee (%) |
|----------|-----------------------------------------------------------------------------------|-----------|--------|
| 2        | 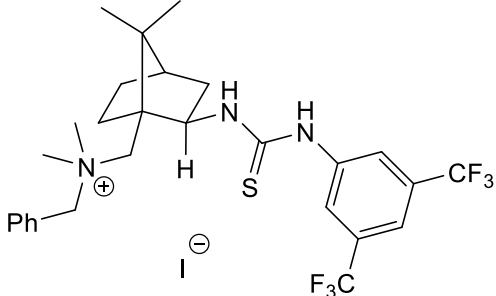 | 96        | 9 (S)  |

HPLC: Chiralpak AD-H, *n*-Hexane/*i*PrOH = 200:1, flow rate 0.75 mL/min,  $\lambda$  = 250 nm, 10°C

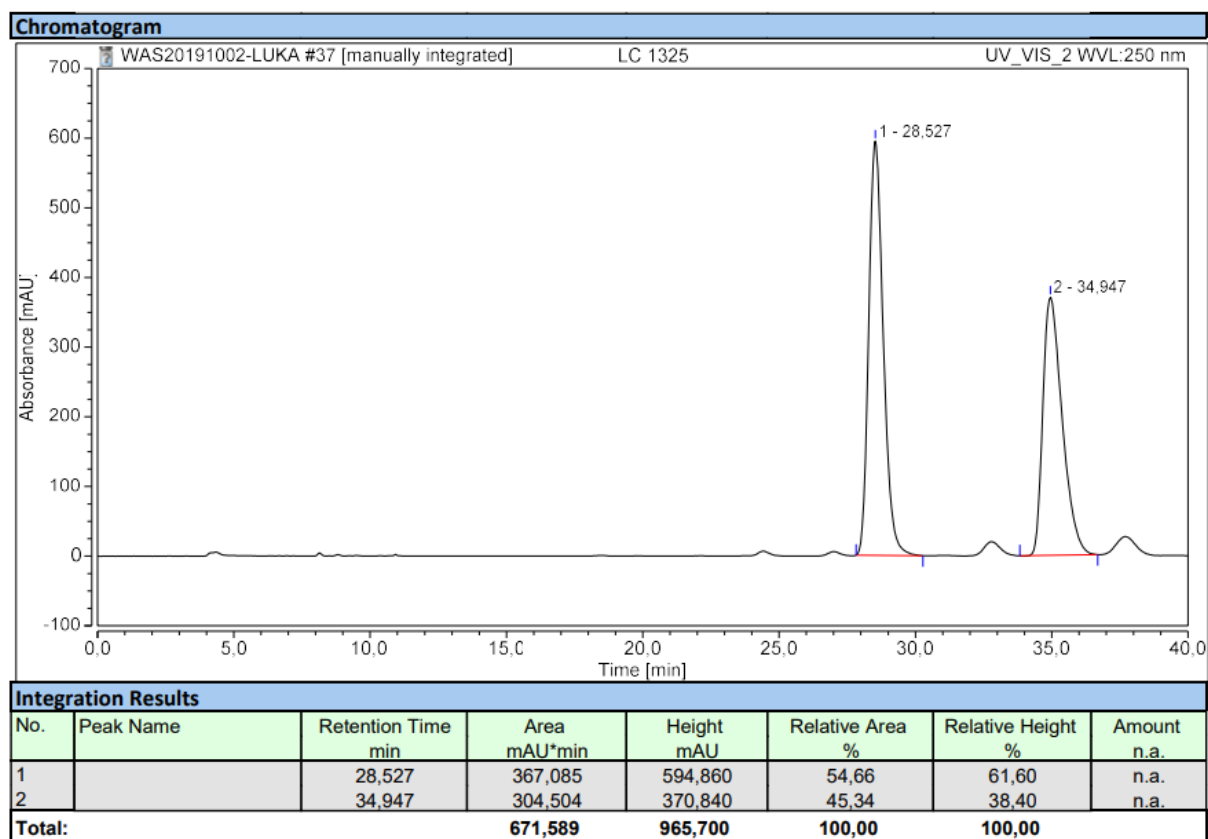



Table S1, Entry 3

| Catalyst |     | Yield (%) | ee (%) |
|----------|-----|-----------|--------|
| 3        | III | 38        | 18 (S) |

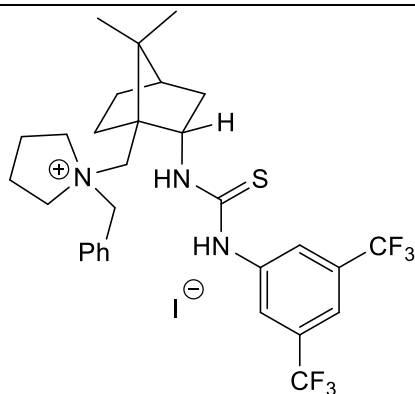

HPLC: Chiralpak AD-H, *n*-Hexane/*i*PrOH = 200:1, flow rate 0.75 mL/min,  $\lambda$  = 250 nm, 10°C

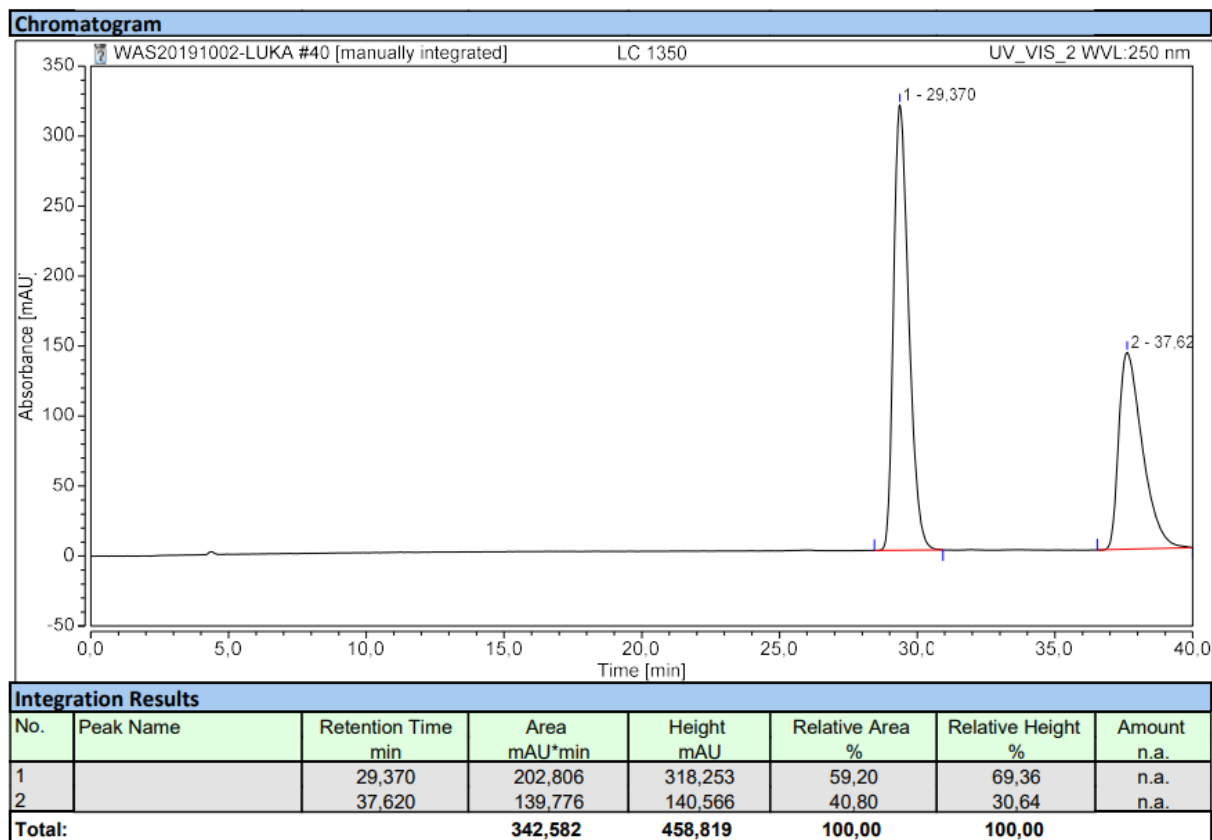

**Table S1, Entry 4**

| Catalyst |    | Yield (%) | ee (%) |
|----------|----|-----------|--------|
| 4        | IV | 96        | 1 (R)  |

HPLC: Chiralpak AD-H, *n*-Hexane/*i*PrOH = 200:1, flow rate 0.75 mL/min,  $\lambda$  = 250 nm, 10°C

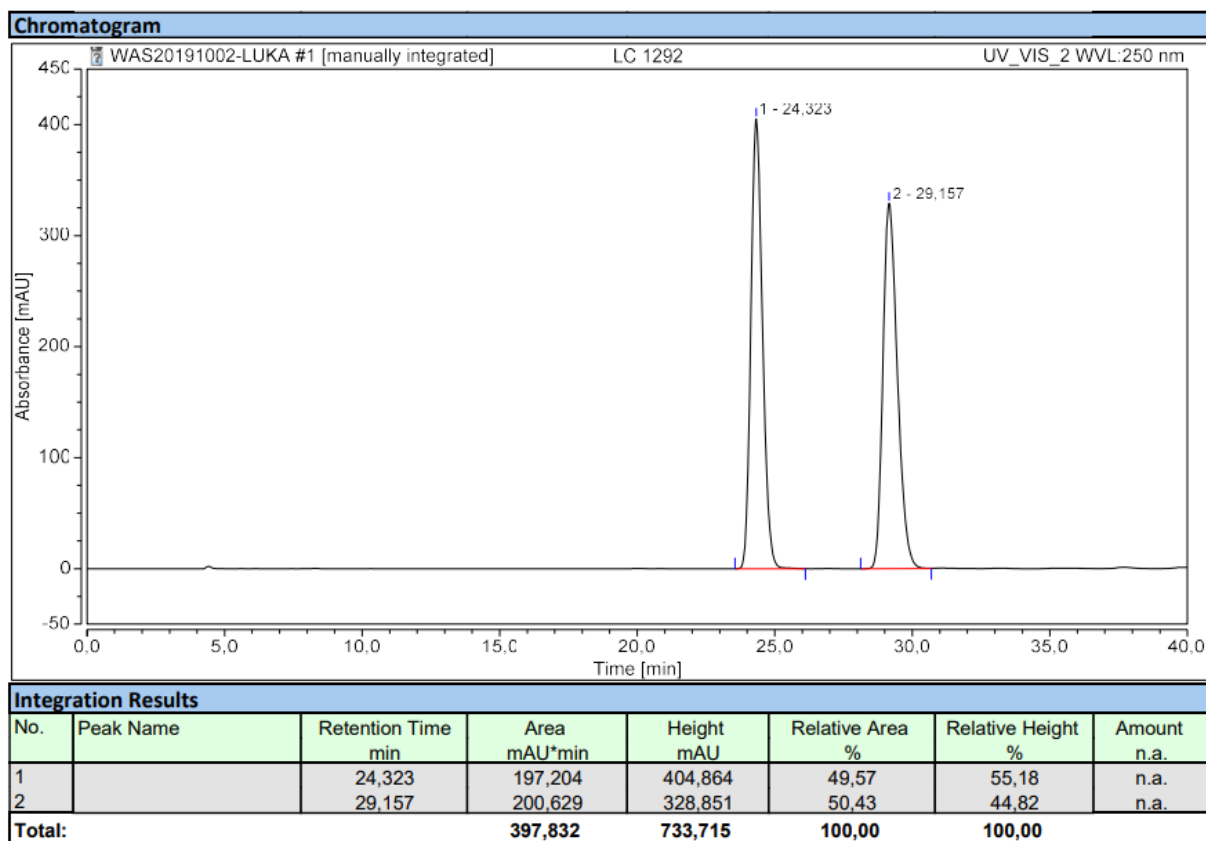

**Table S1, Entry 5**

|   | Catalyst                                                                          | Yield (%) | ee (%)         |
|---|-----------------------------------------------------------------------------------|-----------|----------------|
| 5 | 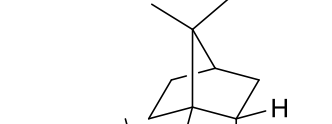 | 94        | 3 ( <i>R</i> ) |

HPLC: Chiralpak AD-H, *n*-Hexane/*i*PrOH = 200:1, flow rate 0.75 mL/min,  $\lambda$  = 250 nm, 10°C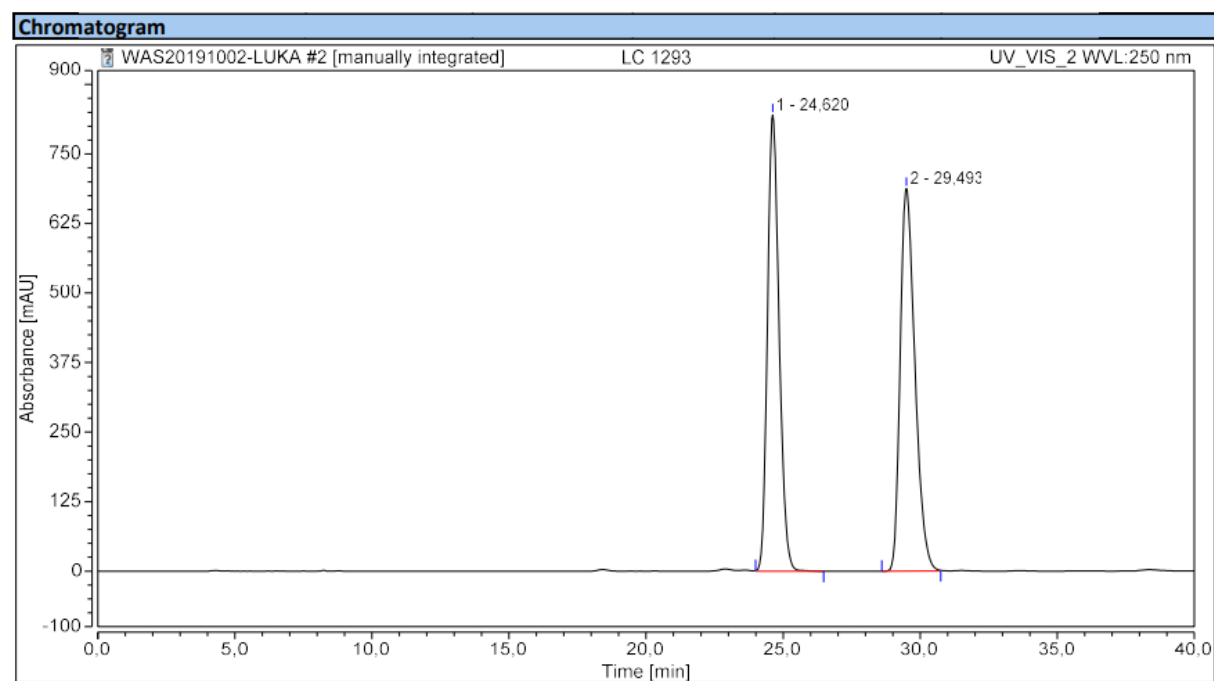

| Integration Results |           |                       |                 |                 |                    |                      |                |
|---------------------|-----------|-----------------------|-----------------|-----------------|--------------------|----------------------|----------------|
| No.                 | Peak Name | Retention Time<br>min | Area<br>mAU*min | Height<br>mAU   | Relative Area<br>% | Relative Height<br>% | Amount<br>n.a. |
| 1                   |           | 24,620                | 403,853         | 820,449         | 48,44              | 54,40                | n.a.           |
| 2                   |           | 29,493                | 429,856         | 687,839         | 51,56              | 45,60                | n.a.           |
| <b>Total:</b>       |           |                       | <b>833,709</b>  | <b>1508,288</b> | <b>100,00</b>      | <b>100,00</b>        |                |

**Table S1, Entry 6**

| Catalyst |                                                                                             | Yield (%) | ee (%) |
|----------|---------------------------------------------------------------------------------------------|-----------|--------|
| 6        | <b>VI</b> 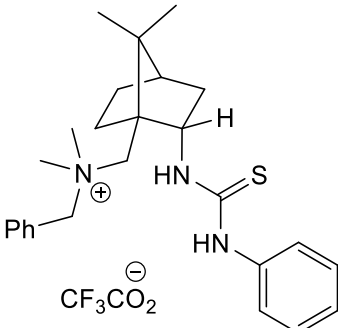 | 58        | 5 (S)  |

HPLC: Chiralpak AD-H, *n*-Hexane/*i*PrOH = 200:1, flow rate 0.75 mL/min,  $\lambda$  = 250 nm, 10°C

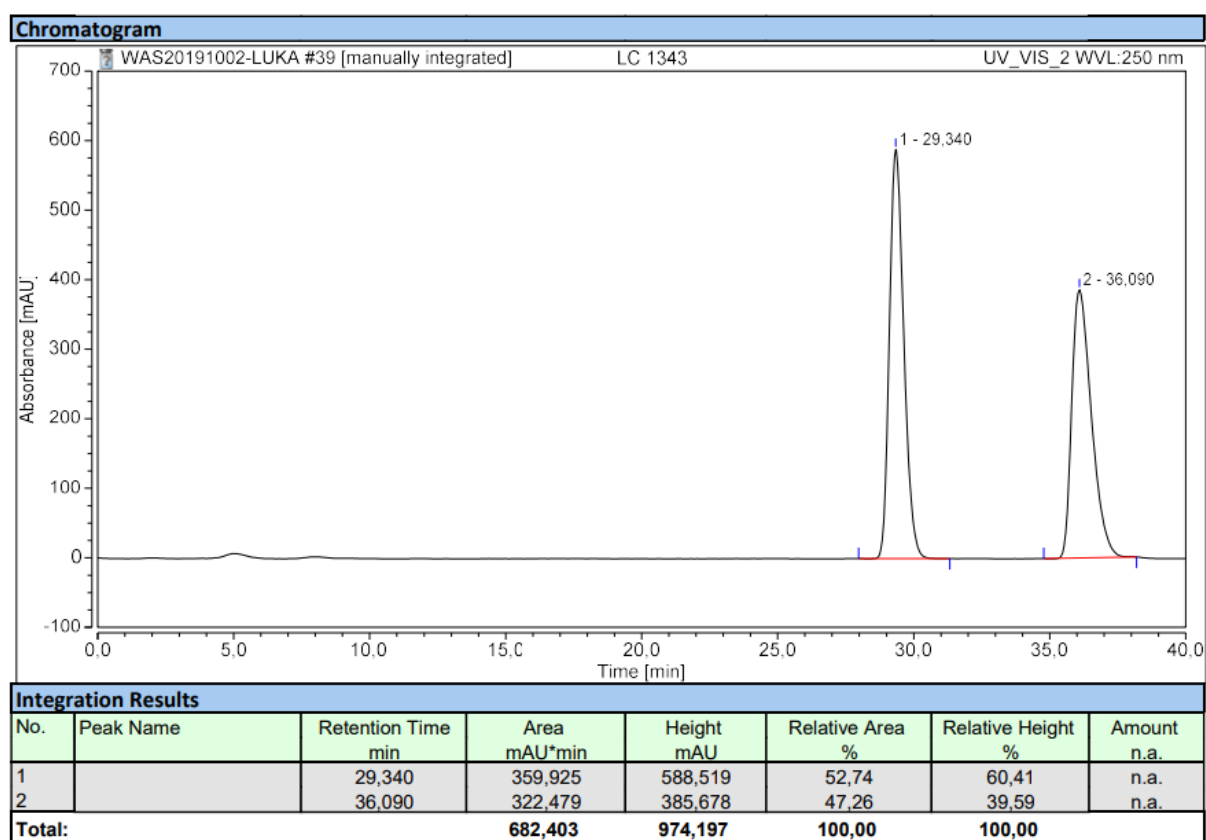

Table S1, Entry 7

| Catalyst |                                                                                              | Yield (%) | ee (%) |
|----------|----------------------------------------------------------------------------------------------|-----------|--------|
| 7        | <b>VII</b> 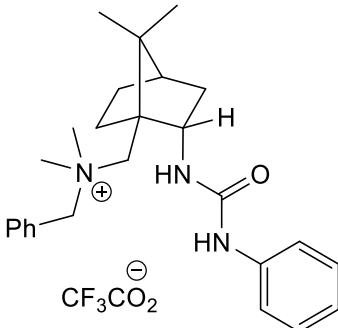 | 71        | 5 (S)  |

HPLC: Chiralpak AD-H, *n*-Hexane/*i*PrOH = 200:1, flow rate 0.75 mL/min,  $\lambda$  = 250 nm, 10°C

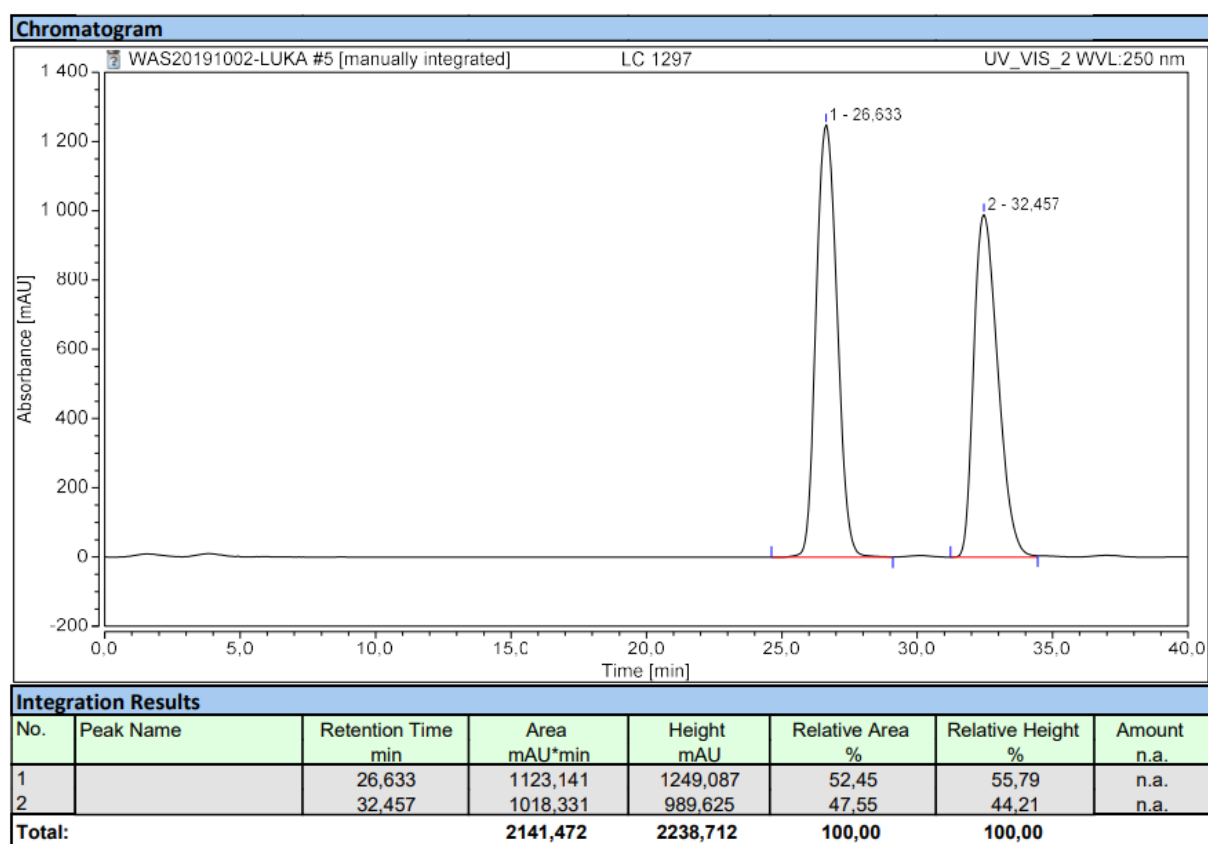

Table S1, Entry 8

| Catalyst |      | Yield (%) | ee (%) |
|----------|------|-----------|--------|
| 8        | VIII | 87        | 29 (S) |

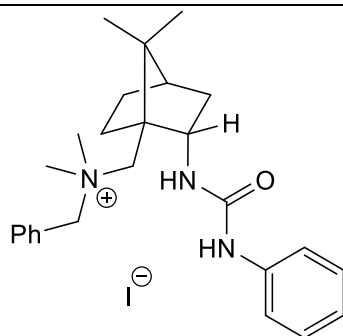

HPLC: Chiralpak AD-H, *n*-Hexane/*i*PrOH = 200:1, flow rate 0.75 mL/min,  $\lambda$  = 250 nm, 10°C

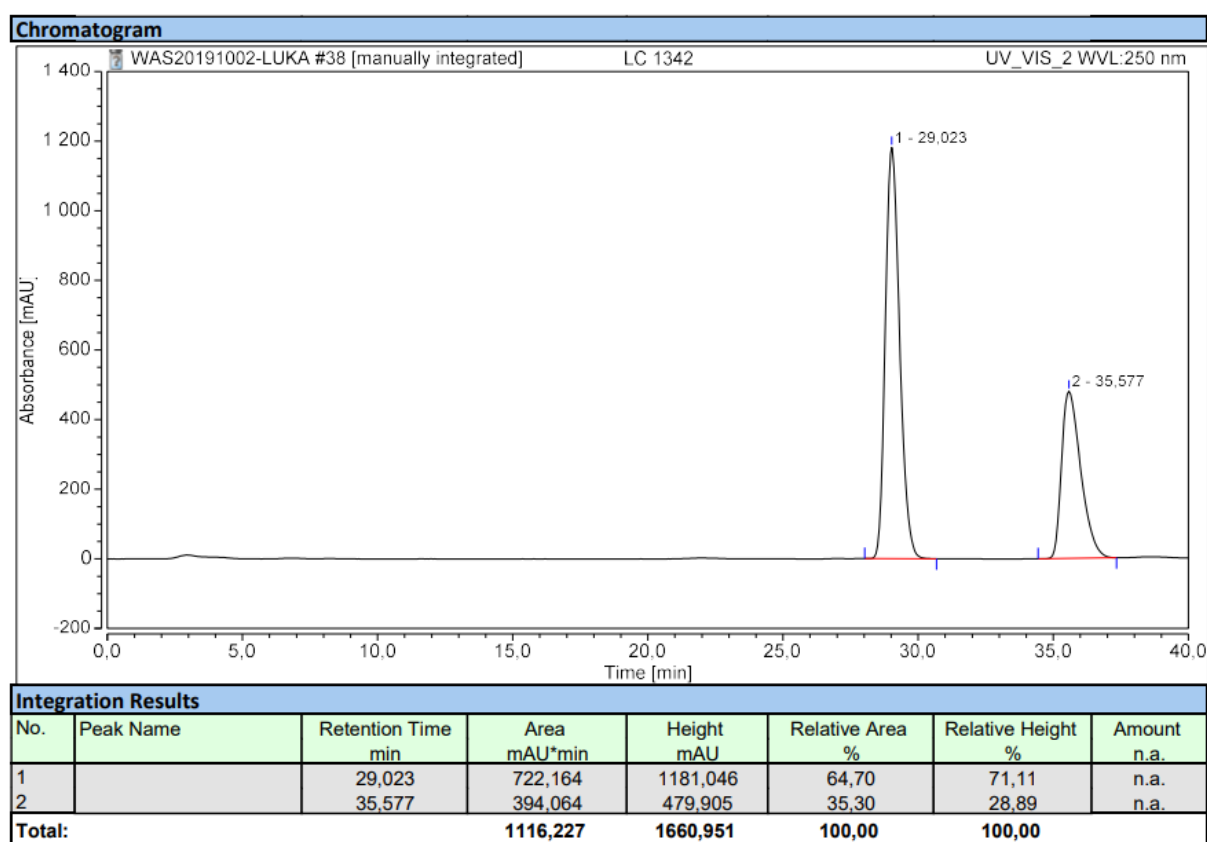

Table S1, Entry 9

| Catalyst |    | Yield (%) | ee (%) |
|----------|----|-----------|--------|
| 9        | IX | 90        | 18 (S) |

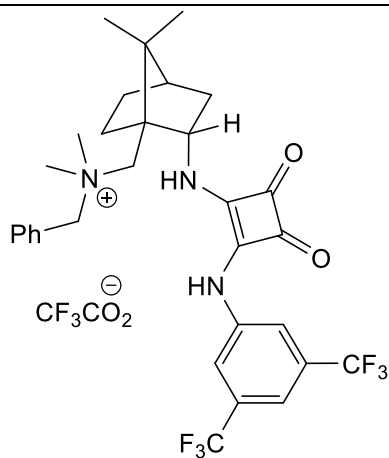

HPLC: Chiralpak AD-H, *n*-Hexane/*i*PrOH = 200:1, flow rate 0.75 mL/min,  $\lambda$  = 250 nm, 10°C

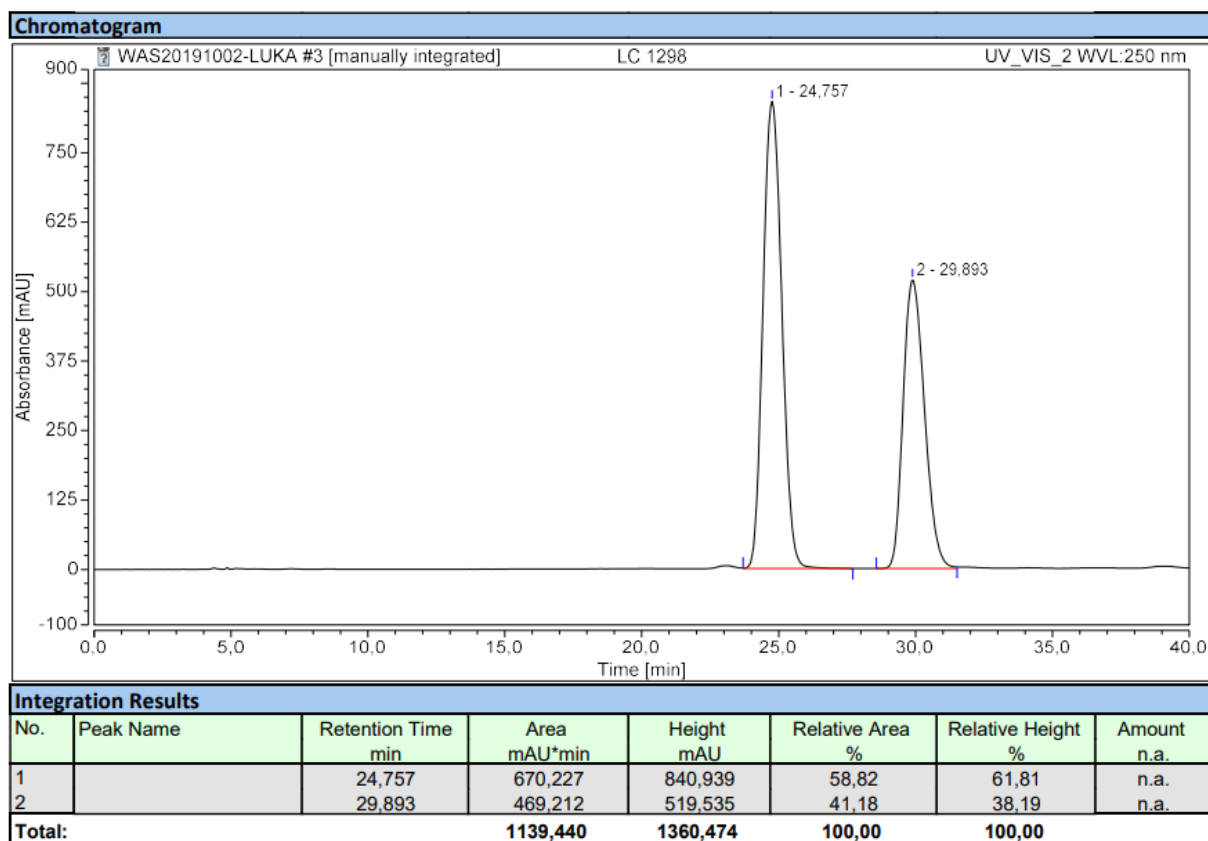

**Table S2.** Further evaluation of organocatalysts **III**, **VIII**, and **IX** in the fluorination of  $\beta$ -keto ester **9**.<sup>2,3 [a]</sup>

| 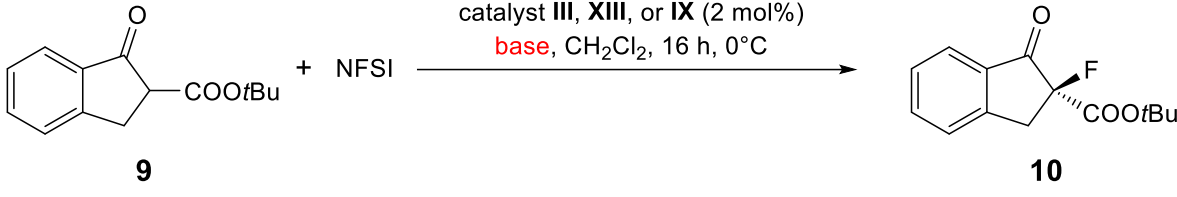 |             |                                                |                          |                       |
|------------------------------------------------------------------------------------|-------------|------------------------------------------------|--------------------------|-----------------------|
| Entry                                                                              | Catalyst    | Base                                           | Yield <sup>[b]</sup> (%) | ee <sup>[c]</sup> (%) |
| 1                                                                                  | <b>III</b>  | K <sub>3</sub> PO <sub>4(aq)</sub><br>(1 eq.)  | 64                       | 0                     |
| 2                                                                                  | <b>III</b>  | K <sub>3</sub> PO <sub>4(aq)</sub><br>(2 eq.)  | 48                       | 2 ( <i>S</i> )        |
| 3                                                                                  | <b>III</b>  | K <sub>3</sub> PO <sub>4(aq)</sub><br>(1 eq.)  | 87                       | 0                     |
| 4                                                                                  | <b>VIII</b> | K <sub>3</sub> PO <sub>4(aq)</sub><br>(1 eq.)  | 77                       | 28 ( <i>S</i> )       |
| 5                                                                                  | <b>VIII</b> | K <sub>3</sub> PO <sub>4(s)</sub><br>(1 eq.)   | 96                       | 23 ( <i>S</i> )       |
| 6                                                                                  | <b>IX</b>   | K <sub>3</sub> PO <sub>4(aq)</sub><br>(1 eq.)  | 80                       | 26 ( <i>S</i> )       |
| 7                                                                                  | <b>IX</b>   | K <sub>3</sub> PO <sub>4(aq)</sub><br>(2 eq.)  | 98                       | 19 ( <i>S</i> )       |
| 8                                                                                  | <b>IX</b>   | K <sub>2</sub> HPO <sub>4(aq)</sub><br>(2 eq.) | 96                       | 9 ( <i>S</i> )        |
| 9                                                                                  | <b>IX</b>   | Cs <sub>2</sub> CO <sub>3(aq)</sub><br>(2 eq.) | 49                       | 19 ( <i>S</i> )       |
| 10                                                                                 | <b>IX</b>   | K <sub>2</sub> CO <sub>3(aq)</sub><br>(2 eq.)  | 51                       | 14 ( <i>S</i> )       |

[a] Appropriate base (2 M) was added to a mixture of  $\beta$ -keto ester **9** (0.1 mmol, 24.4 mg,  $\omega$  = 95%) and organocatalyst **III**, **VIII**, or **IX** (2 mol%) in CH<sub>2</sub>Cl<sub>2</sub> (2 mL) under argon atmosphere. Mixture was cooled to –10°C and NFSI (1.1 equivalents, 34.7 mg) was added in two portions over 2 h. The reaction mixture was stirred for another 12 h at –10°C. After completion, the reaction was quenched by addition of NH<sub>4</sub>Cl (aq. sat, 4 mL) and extracted with CH<sub>2</sub>Cl<sub>2</sub> (10



mL). The organic phase was dried over anhydrous  $\text{Na}_2\text{SO}_4$ , filtered, and the volatiles were evaporated *in vacuo*. The residue was purified by column chromatography (Silica gel 60, EtOAc/*n*-Heptane = 1 : 15). [b] Reaction yield determined after isolation with column chromatography (Silica gel 60, EtOAc/*n*-Heptane = 1 : 15). [c] *ee* determined by HPLC (Chiralpak AD-H, *n*-Hexane/*i*-PrOH = 200:1, flow rate 0.75 mL/min,  $\lambda$  = 250 nm, 10°C) after the isolation by column chromatography. [d] 2 equivalents of  $\text{K}_3\text{PO}_4$ .

Table S2, Entry 1

| Catalyst                                                                                              | Base                                          | Yield (%) | ee (%) |
|-------------------------------------------------------------------------------------------------------|-----------------------------------------------|-----------|--------|
| <b>1</b> <b>III</b> 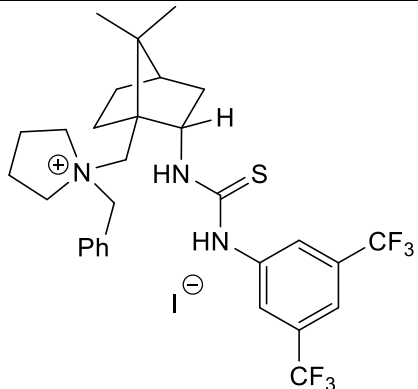 | $\text{K}_3\text{PO}_4(\text{aq})$<br>(1 eq.) | 64        | 0      |

HPLC: Chiralpak AD-H, *n*-Hexane/*i*PrOH = 200:1, flow rate 0.75 mL/min,  $\lambda$  = 250 nm, 10°C

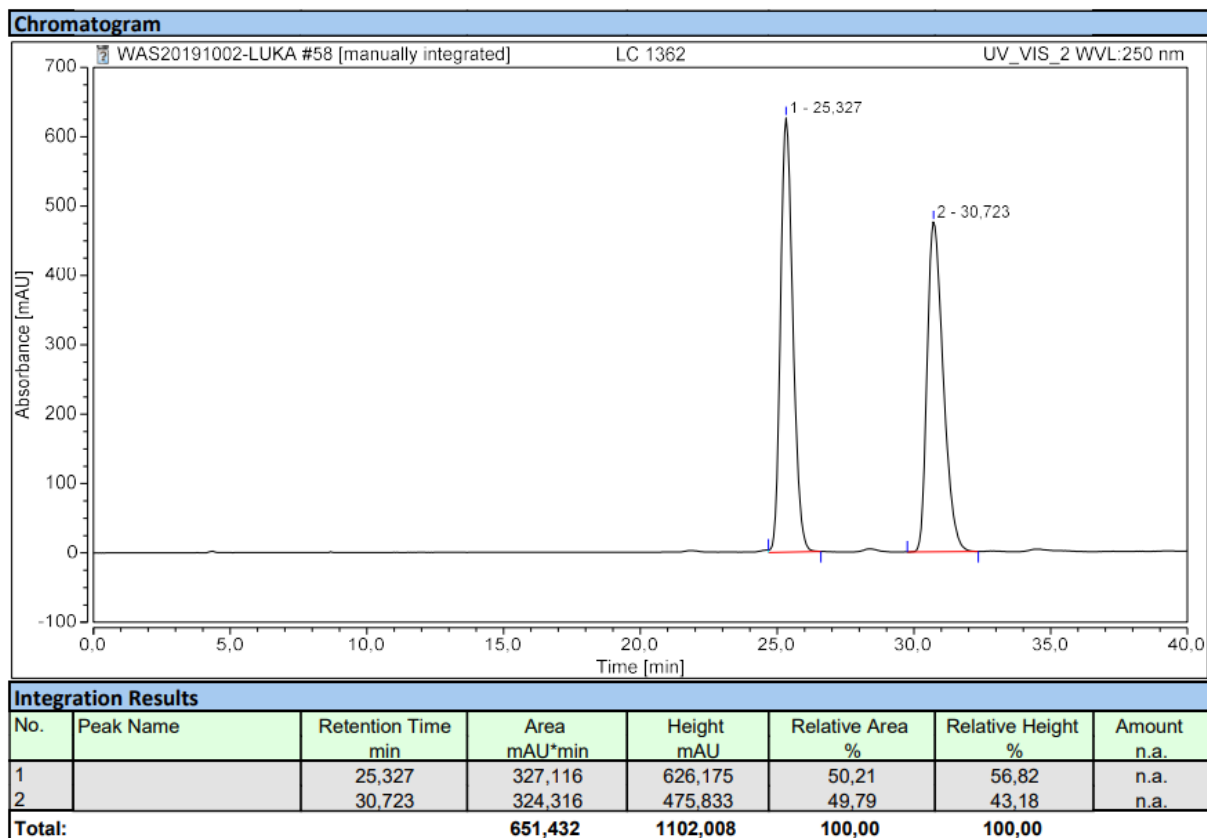

Table S2, Entry 2

| Catalyst                                                                                       | Base                                          | Yield (%) | ee (%) |
|------------------------------------------------------------------------------------------------|-----------------------------------------------|-----------|--------|
| <b>2 III</b> 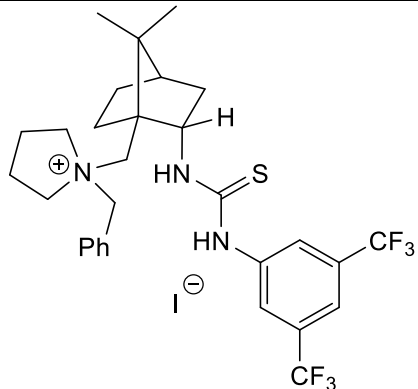 | $\text{K}_3\text{PO}_4(\text{aq})$<br>(2 eq.) | 48        | 2 (S)  |

HPLC: Chiralpak AD-H, *n*-Hexane/*i*PrOH = 200:1, flow rate 0.75 mL/min,  $\lambda$  = 250 nm, 10°C

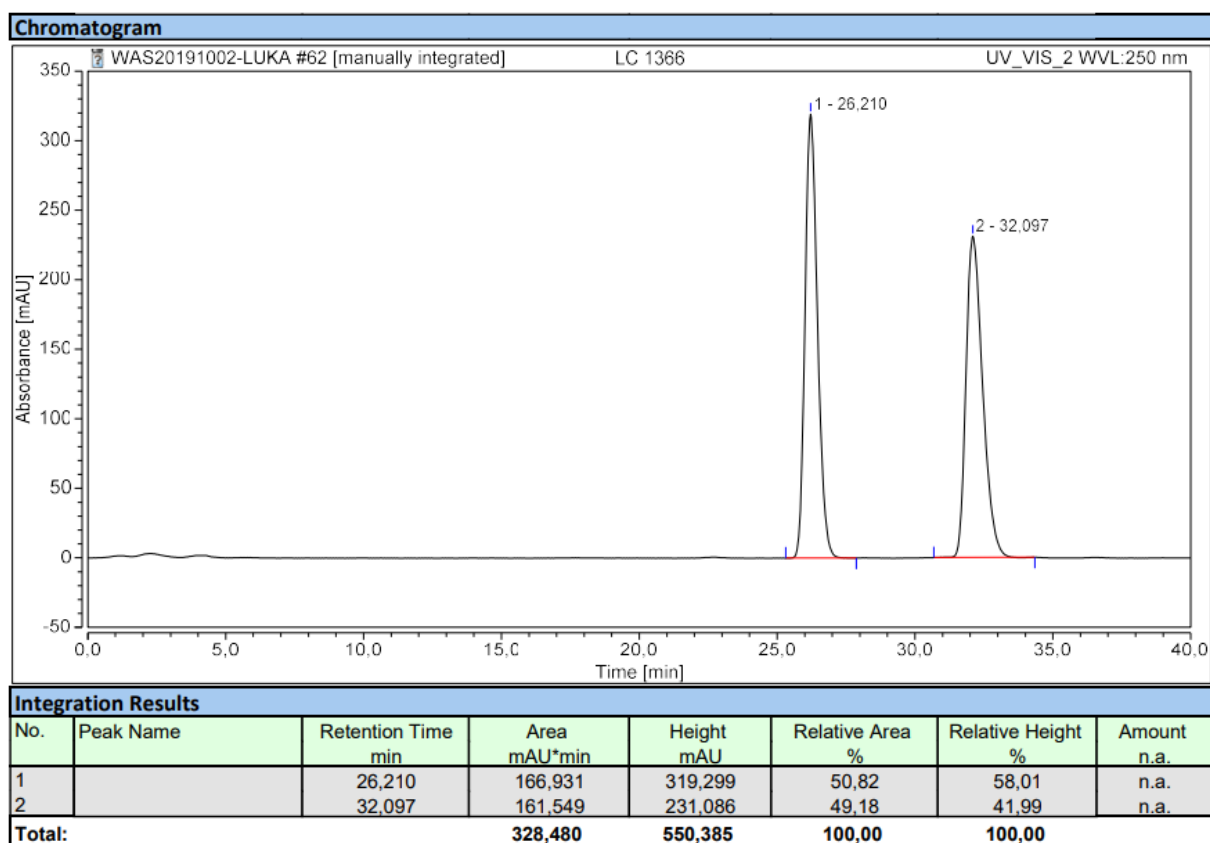

Table S2, Entry 3

| Catalyst                                                                                       | Base                                            | Yield (%) | ee (%) |
|------------------------------------------------------------------------------------------------|-------------------------------------------------|-----------|--------|
| 3 <b>III</b> 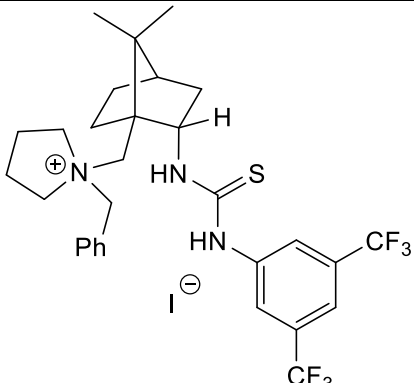 | $\text{K}_3\text{PO}_{4(\text{aq})}$<br>(1 eq.) | 87        | 0      |

HPLC: Chiralpak AD-H, *n*-Hexane/*i*PrOH = 200:1, flow rate 0.75 mL/min,  $\lambda$  = 250 nm, 10°C

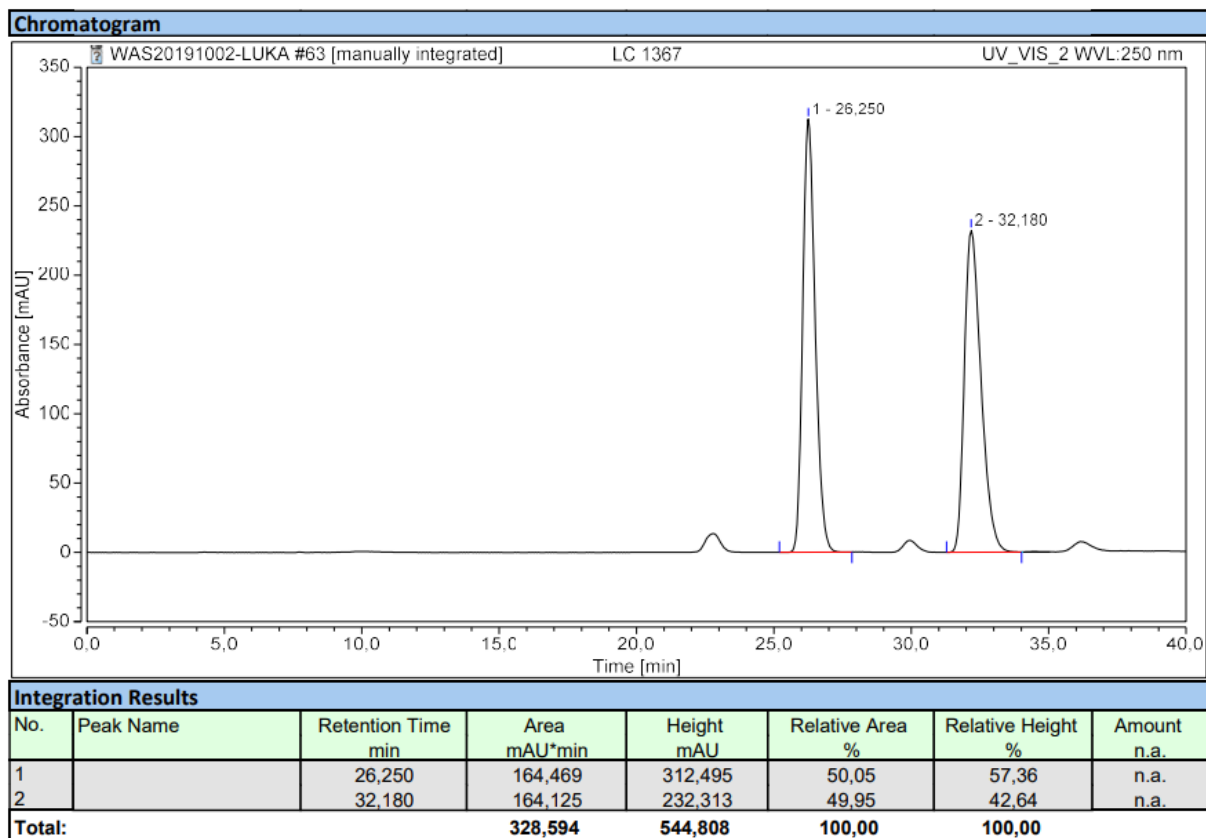

Table S2, Entry 4

| Catalyst                                                                                        | Base                                          | Yield (%) | ee (%)          |
|-------------------------------------------------------------------------------------------------|-----------------------------------------------|-----------|-----------------|
| 4 <b>VIII</b> 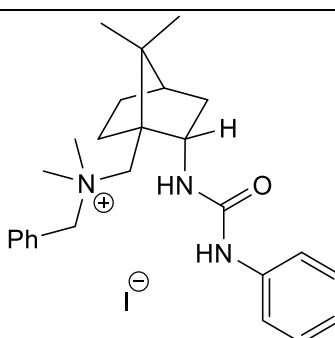 | $\text{K}_3\text{PO}_4(\text{aq})$<br>(1 eq.) | 77        | 28 ( <i>S</i> ) |

HPLC: Chiralpak AD-H, *n*-Hexane/*i*PrOH = 200:1, flow rate 0.75 mL/min,  $\lambda$  = 250 nm, 10°C

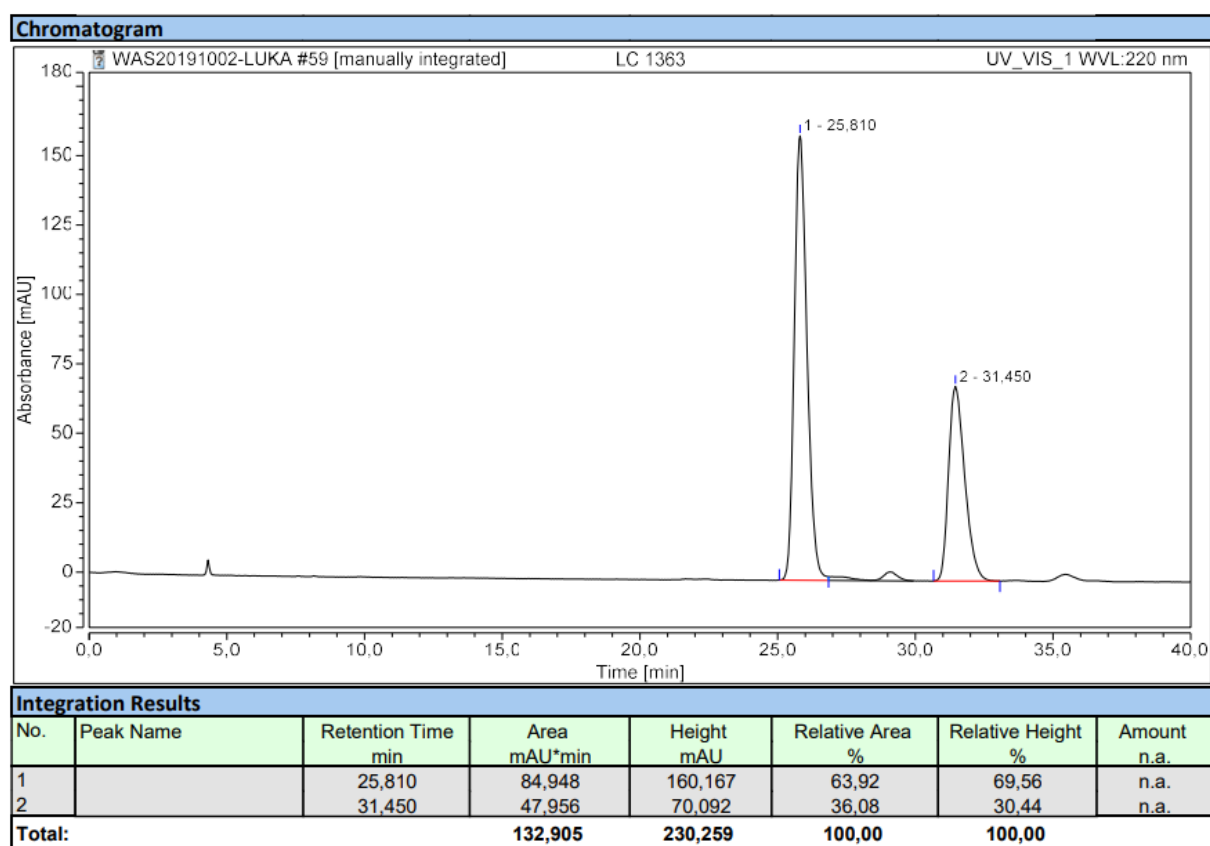

|   | Catalyst                                                                                      | Base                                         | Yield (%) | ee (%)          |
|---|-----------------------------------------------------------------------------------------------|----------------------------------------------|-----------|-----------------|
| 5 | <b>VIII</b> 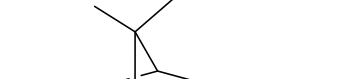 | $\text{K}_3\text{PO}_4(\text{s})$<br>(1 eq.) | 96        | 23 ( <i>S</i> ) |

**Chromatogram**

WAS20191002-LUKA #61 [manually integrated] LC 1365 UV\_VIS\_2 WVL:250 nm

The chromatogram displays absorbance in milliabsorbance units (mAU) on the y-axis (ranging from -100 to 800) against time in minutes on the x-axis (ranging from 0.0 to 40.0). Two distinct peaks are observed: Peak 1 at 26.153 minutes with an absorbance of approximately 720 mAU, and Peak 2 at 31.983 minutes with an absorbance of approximately 340 mAU. The baseline is relatively flat with minor noise. Integration markers (vertical blue lines) are present at the retention times of the peaks, and a red horizontal line indicates the baseline level.

| No.           | Peak Name | Retention Time<br>min | Area<br>mAU*min | Height<br>mAU   | Relative Area<br>% | Relative Height<br>% | Amount<br>n.a. |
|---------------|-----------|-----------------------|-----------------|-----------------|--------------------|----------------------|----------------|
| 1             |           | 26,153                | 384,712         | 727,676         | 61,36              | 67,92                | n.a.           |
| 2             |           | 31,983                | 242,288         | 343,744         | 38,64              | 32,08                | n.a.           |
| <b>Total:</b> |           |                       | <b>627,000</b>  | <b>1071,419</b> | <b>100,00</b>      | <b>100,00</b>        |                |

Table S2, Entry 6

| Catalyst                                                                                      | Base                                          | Yield (%) | ee (%) |
|-----------------------------------------------------------------------------------------------|-----------------------------------------------|-----------|--------|
| 6 <b>IX</b> 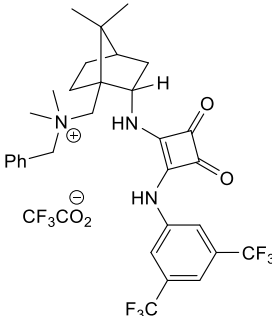 | $\text{K}_3\text{PO}_4(\text{aq})$<br>(1 eq.) | 80        | 26 (S) |

HPLC: Chiralpak AD-H, *n*-Hexane/*i*PrOH = 200:1, flow rate 0.75 mL/min,  $\lambda$  = 250 nm, 10°C

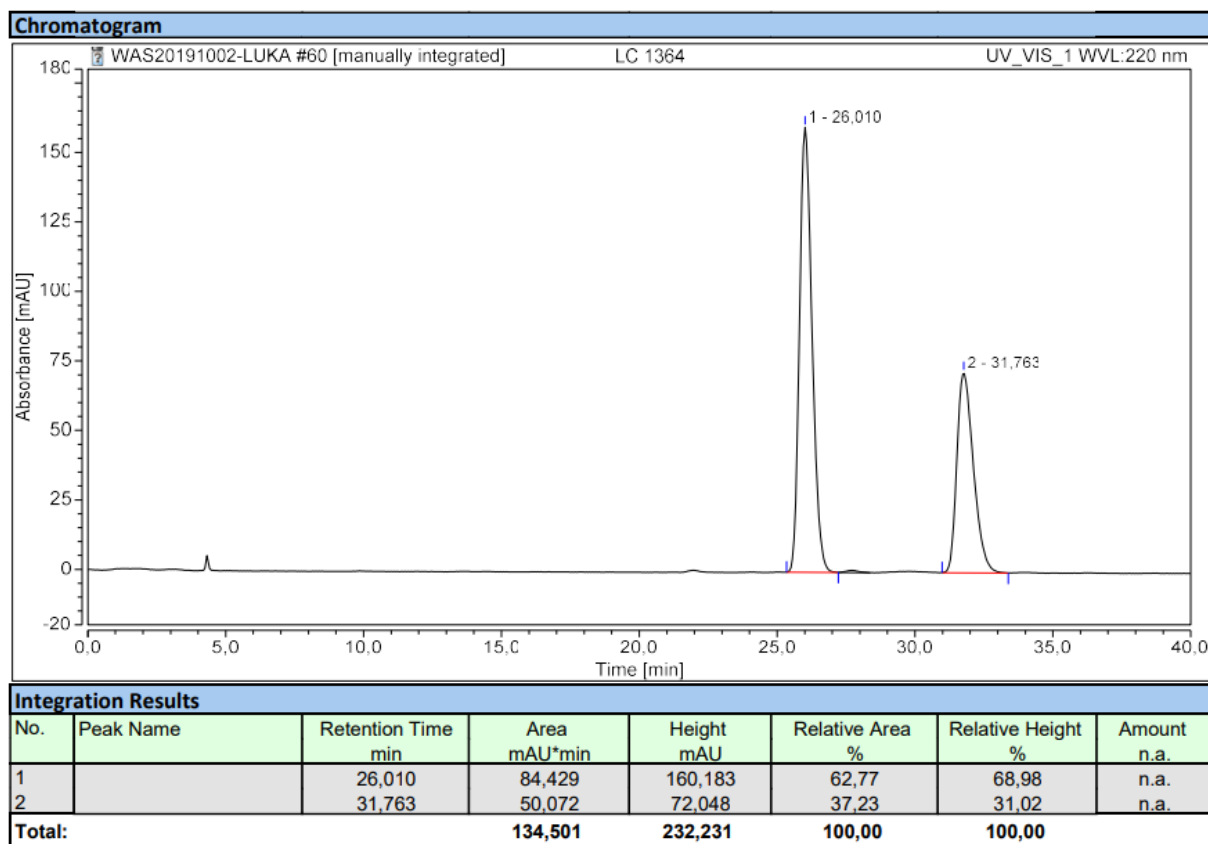

Table S2, Entry 7

| Catalyst                                                                                      | Base                                          | Yield (%) | ee (%) |
|-----------------------------------------------------------------------------------------------|-----------------------------------------------|-----------|--------|
| 7 <b>IX</b> 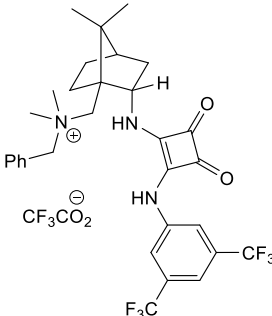 | $\text{K}_3\text{PO}_4(\text{aq})$<br>(2 eq.) | 98        | 19 (S) |

HPLC: Chiralpak AD-H, *n*-Hexane/*i*PrOH = 200:1, flow rate 0.75 mL/min,  $\lambda$  = 250 nm, 10°C

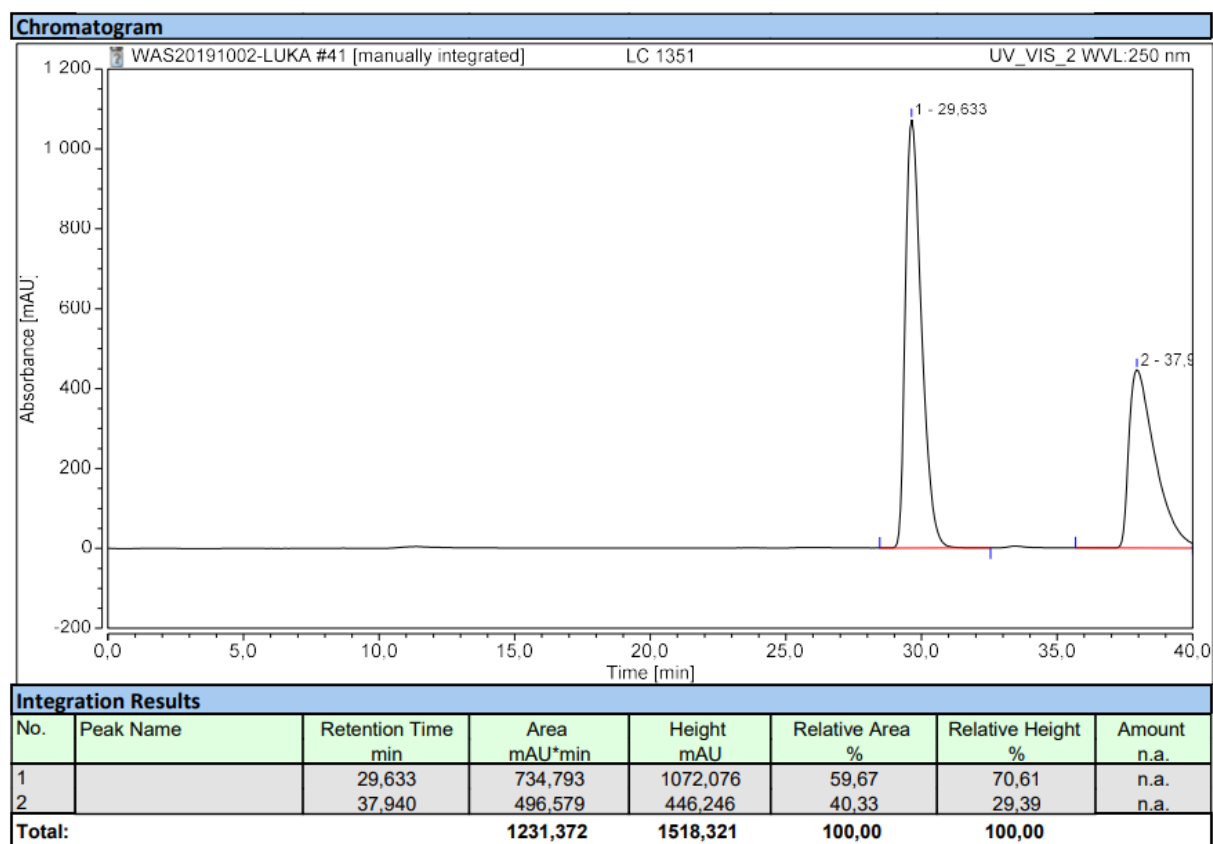



Table S2, Entry 8

| Catalyst                                                                                      | Base                                             | Yield (%) | ee (%) |
|-----------------------------------------------------------------------------------------------|--------------------------------------------------|-----------|--------|
| 8 <b>IX</b> 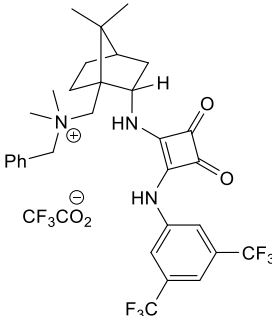 | $\text{K}_2\text{HPO}_{4(\text{aq})}$<br>(2 eq.) | 96        | 9 (S)  |

HPLC: Chiralpak AD-H, *n*-Hexane/*i*PrOH = 200:1, flow rate 0.75 mL/min,  $\lambda$  = 250 nm, 10°C

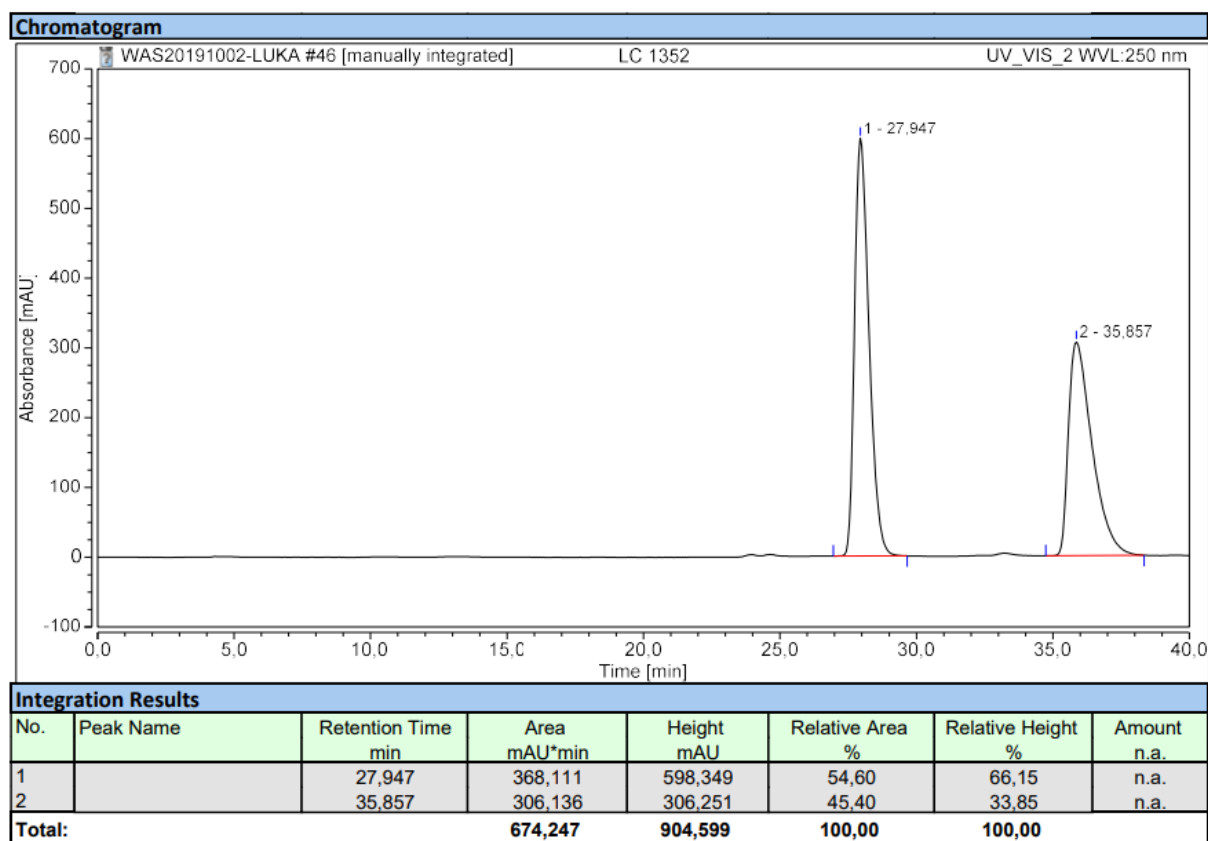

Table S2, Entry 9

| Catalyst                                                                                      | Base                                           | Yield (%) | ee (%)          |
|-----------------------------------------------------------------------------------------------|------------------------------------------------|-----------|-----------------|
| 9 <b>IX</b> 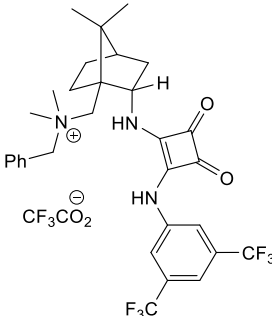 | $\text{Cs}_2\text{CO}_3(\text{aq})$<br>(2 eq.) | 49        | 19 ( <i>S</i> ) |

HPLC: Chiralpak AD-H, *n*-Hexane/*i*PrOH = 200:1, flow rate 0.75 mL/min,  $\lambda = 250$  nm, 10°C

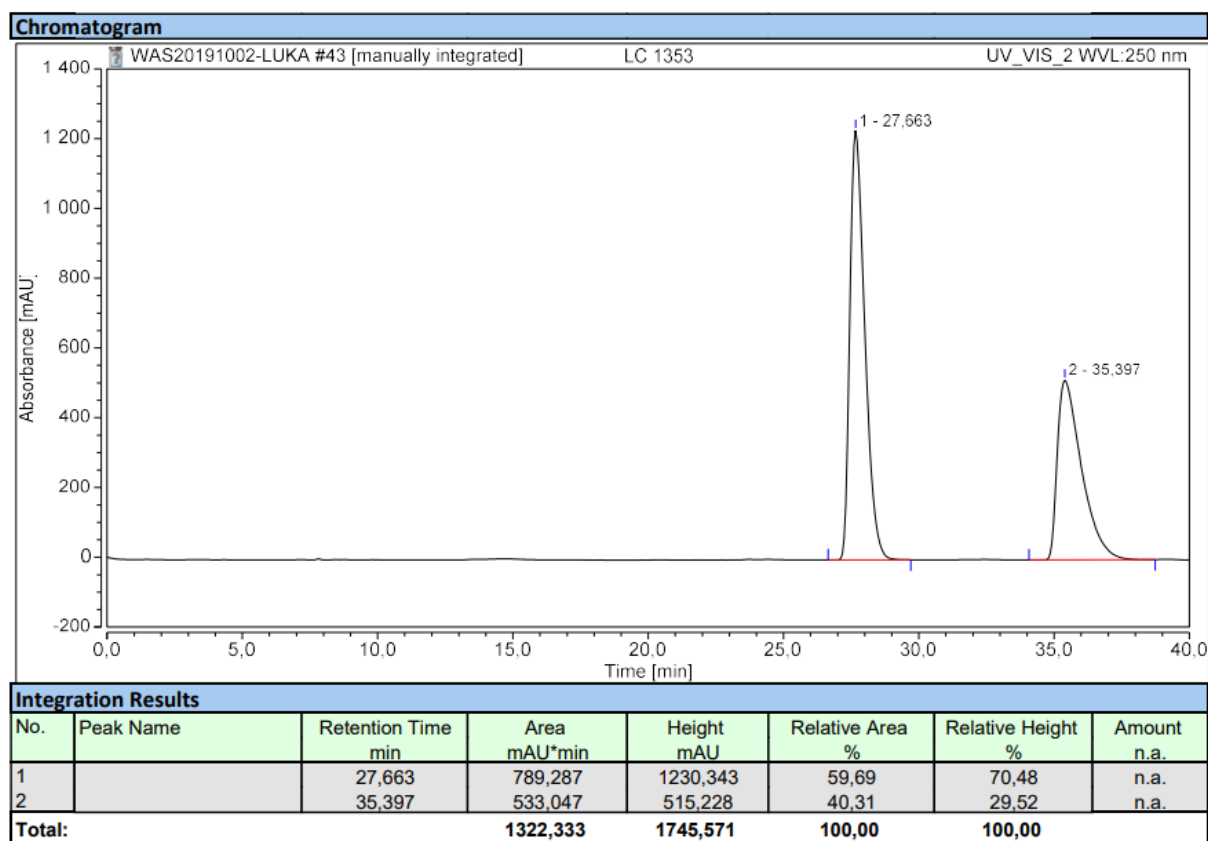

Table S2, Entry 10

| Catalyst                                                                                       | Base                                          | Yield (%) | ee (%) |
|------------------------------------------------------------------------------------------------|-----------------------------------------------|-----------|--------|
| 10 <b>IX</b> 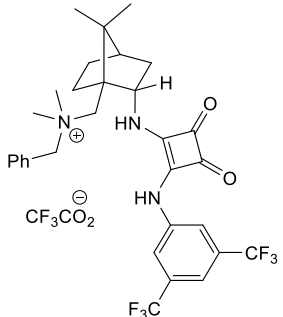 | $\text{K}_2\text{CO}_3(\text{aq})$<br>(2 eq.) | 51        | 14 (S) |

HPLC: Chiralpak AD-H, *n*-Hexane/*i*PrOH = 200:1, flow rate 0.75 mL/min,  $\lambda$  = 250 nm, 10°C

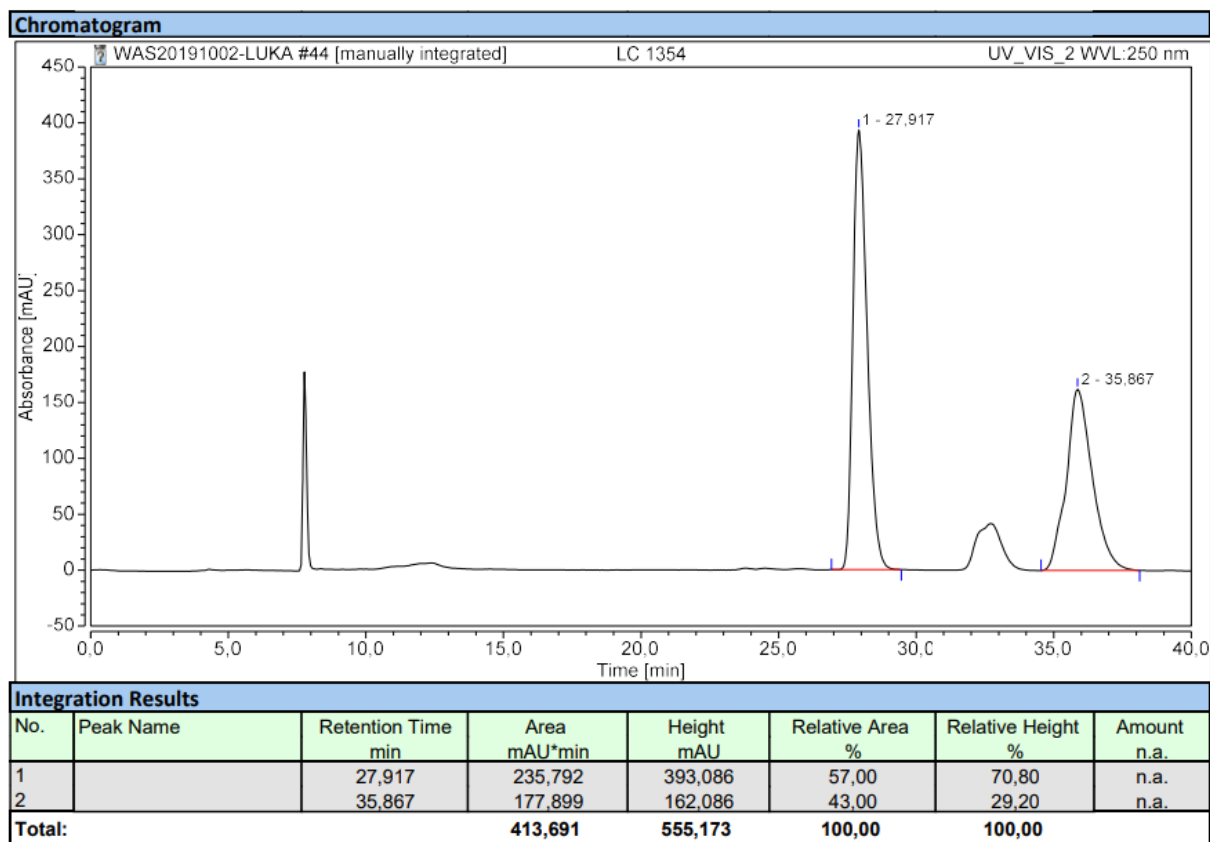

**Table S3.** Evaluation of organocatalysts **II**, **III**, **VI–VIII**, and **IX** in the chlorination of  $\beta$ -keto ester **9**.<sup>4 [a]</sup>

| 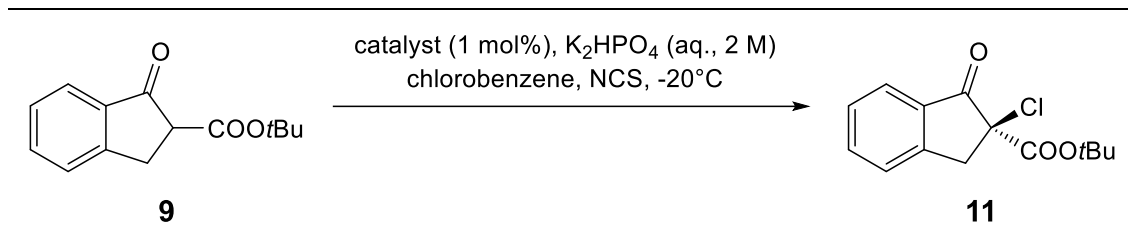 |             |                          |                              |
|------------------------------------------------------------------------------------|-------------|--------------------------|------------------------------|
| Entry                                                                              | Catalyst    | Yield <sup>[b]</sup> (%) | <i>ee</i> <sup>[c]</sup> (%) |
| 1                                                                                  | <b>II</b>   | 73                       | 0                            |
| 2                                                                                  | <b>III</b>  | 27                       | 0                            |
| 3                                                                                  | <b>VI</b>   | 55                       | 0                            |
| 4                                                                                  | <b>VII</b>  | 27                       | 0                            |
| 5                                                                                  | <b>VIII</b> | 64                       | 0                            |
| 6                                                                                  | <b>IX</b>   | 98                       | 7 ( <i>S</i> )               |

[a] To a mixture of  $\beta$ -keto ester **9** (0.1 mmol, 24.4 mg,  $\omega$  = 95%), organocatalyst **II**, **III**, **VI–VIII**, or **IX** (1 mol%),  $K_2HPO_4$  (solid, 1 equivalent, 17.4 mg) in chlorobenzene (2 mL) at  $-20^\circ\text{C}$  under argon atmosphere was added *N*-chlorosuccinimide (NCS, 1.2 equivalents, 16 mg) and the reaction mixture was stirred for 2 h at  $-20^\circ\text{C}$ . After completion, the reaction was quenched by addition of  $NH_4Cl$  (aq. sat, 4 mL) and extracted with  $CH_2Cl_2$  (10 mL). The organic phase was dried over anhydrous  $Na_2SO_4$ , filtered, and the volatiles were evaporated *in vacuo*. The residue was purified by column chromatography (Silica gel 60, EtOAc/*n*-Heptane = 1 : 12). [b] Reaction yield determined after isolation with column chromatography (Silica gel 60, EtOAc/*n*-Heptane = 1 : 12). [c] *ee* determined by HPLC (Chiralpak OJ-H, *n*-Hexane/*i*PrOH = 70:30, flow rate 0.7 mL/min,  $\lambda$  = 250 nm,  $10^\circ\text{C}$ ) isolation with column chromatography (Silica gel 60, EtOAc/*n*-Heptane = 1 : 12).

Table S3, Entry 1

| Catalyst                                                                                             | Yield (%) | ee (%) |
|------------------------------------------------------------------------------------------------------|-----------|--------|
| <b>1</b> <b>II</b> 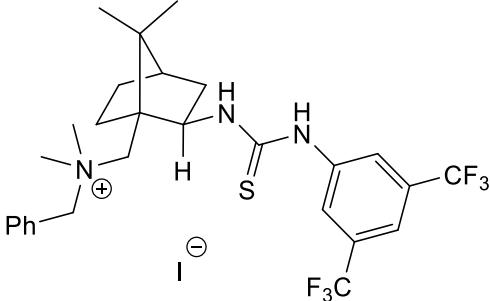 | 73        | 0      |

HPLC: Chiralpak OJ-H, *n*-Hexane/*i*PrOH = 70:30, flow rate 0.7 mL/min,  $\lambda$  = 250 nm, 10°C

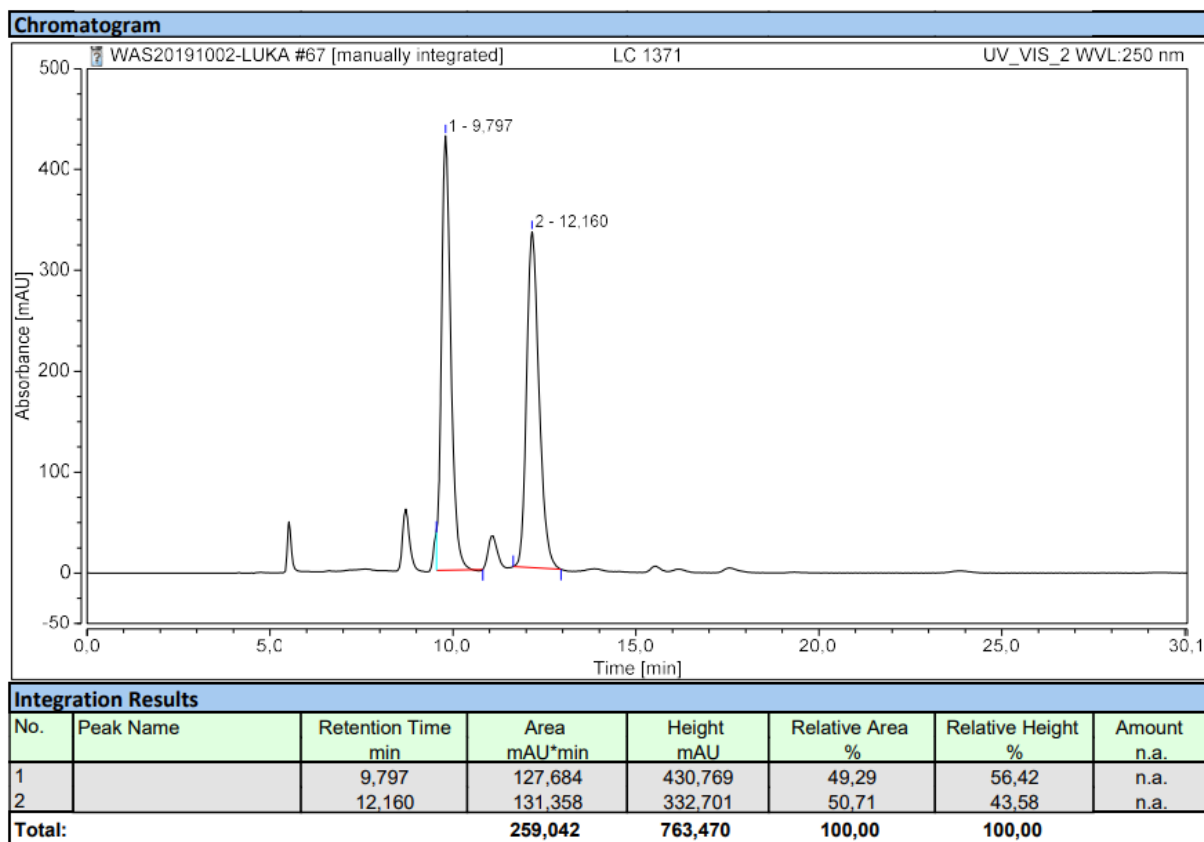

Table S3, Entry 2

| Catalyst                                                                                              | Yield (%) | ee (%) |
|-------------------------------------------------------------------------------------------------------|-----------|--------|
| <p>2 <b>III</b></p> 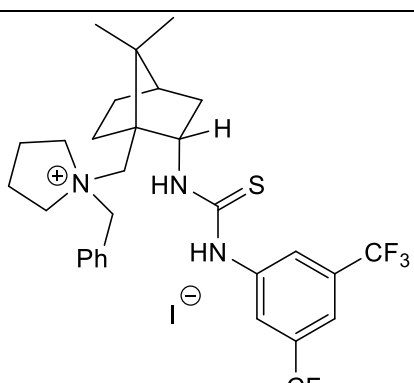 | 27        | 0      |

HPLC: Chiralpak OJ-H, *n*-Hexane/*i*PrOH = 70:30, flow rate 0.7 mL/min,  $\lambda$  = 250 nm, 10°C

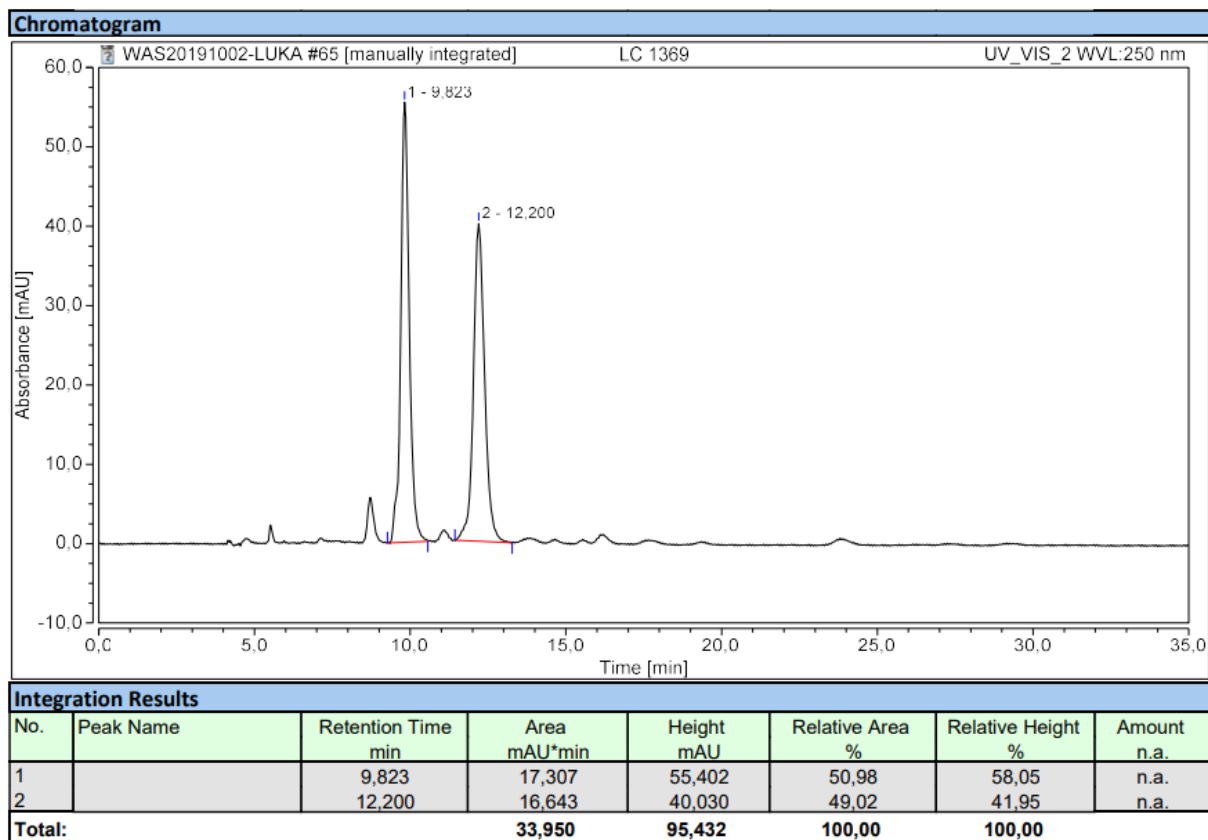

**Table S3, Entry 3**

| Catalyst |                                                                                             | Yield (%) | ee (%) |
|----------|---------------------------------------------------------------------------------------------|-----------|--------|
| 3        | <b>VI</b> 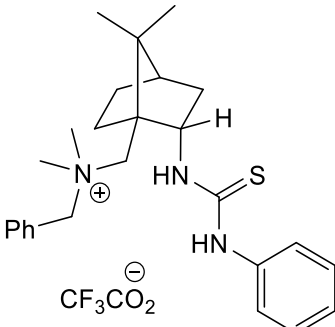 | 55        | 0      |

HPLC: Chiralpak OJ-H, *n*-Hexane/*i*PrOH = 70:30, flow rate 0.7 mL/min,  $\lambda$  = 250 nm, 10°C

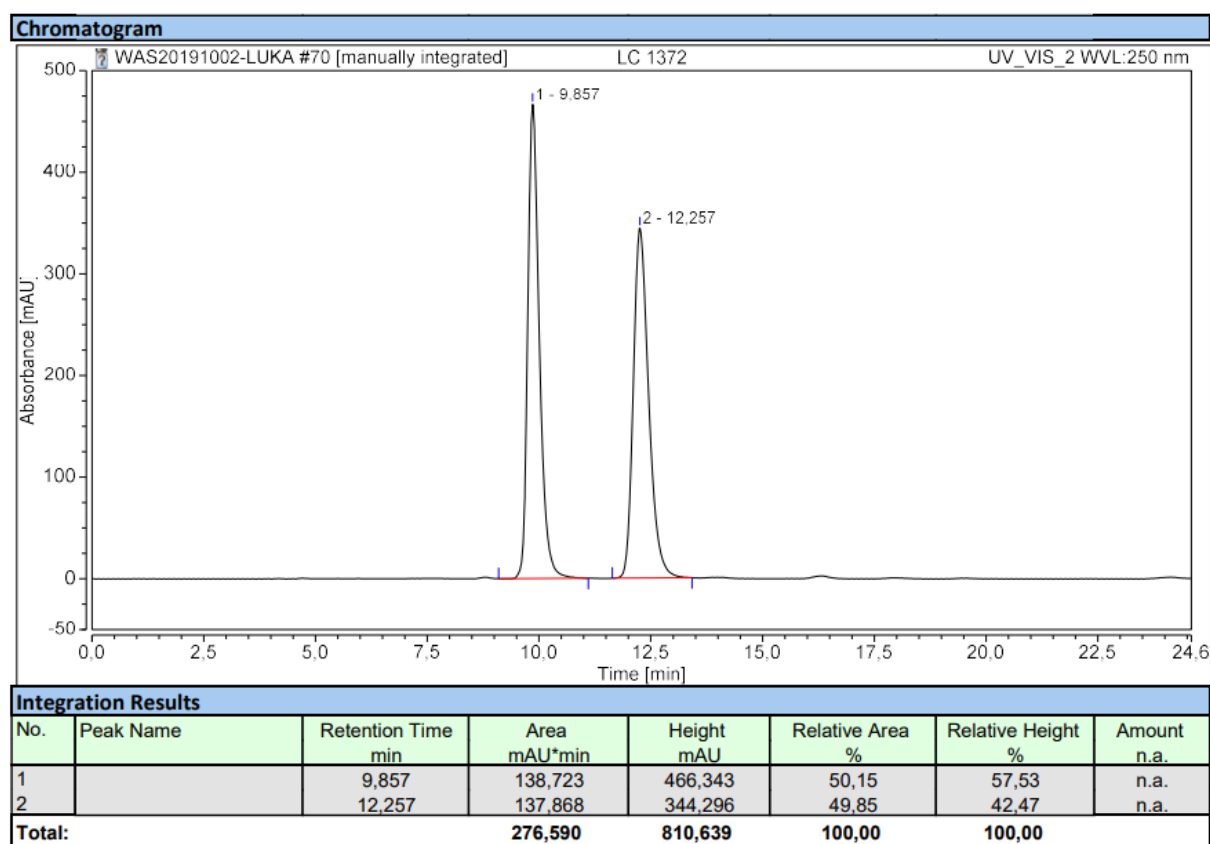

Table S3, Entry 4

| Catalyst |                                                                                                 | Yield (%) | ee (%) |
|----------|-------------------------------------------------------------------------------------------------|-----------|--------|
| 4        | <b>VII</b><br>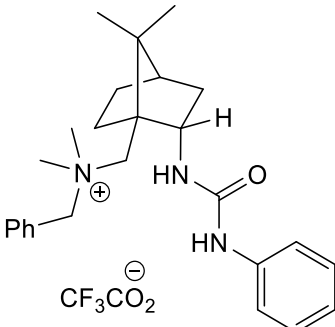 | 27        | 0      |

HPLC: Chiralpak OJ-H, *n*-Hexane/*i*PrOH = 70:30, flow rate 0.7 mL/min,  $\lambda$  = 250 nm, 10°C

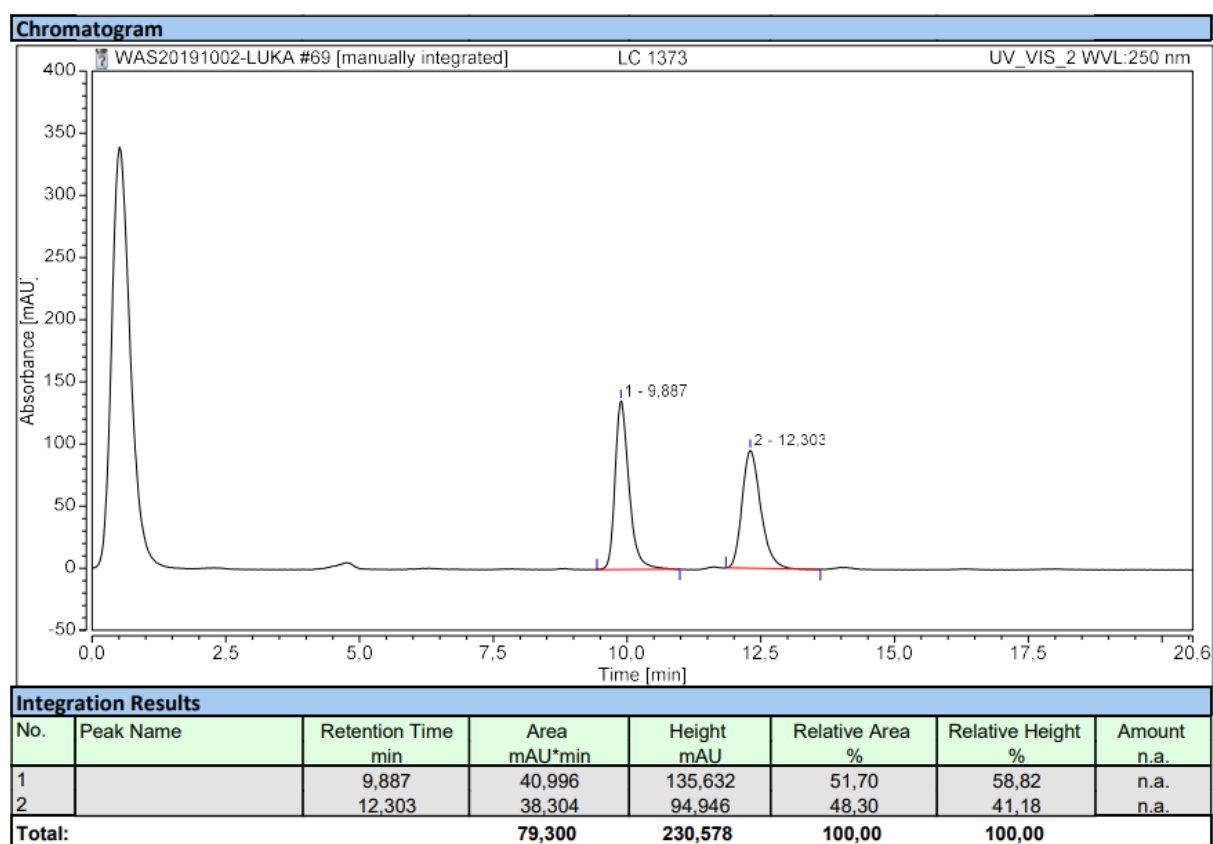



**Table S3, Entry 5**

| Catalyst |                                                                                                  | Yield (%) | ee (%) |
|----------|--------------------------------------------------------------------------------------------------|-----------|--------|
| 5        | <b>VIII</b><br>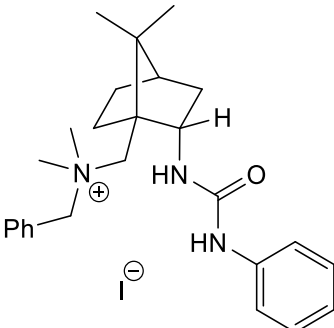 | 64        | 0      |

HPLC: Chiralpak OJ-H, *n*-Hexane/*i*PrOH = 70:30, flow rate 0.7 mL/min,  $\lambda$  = 250 nm, 10°C

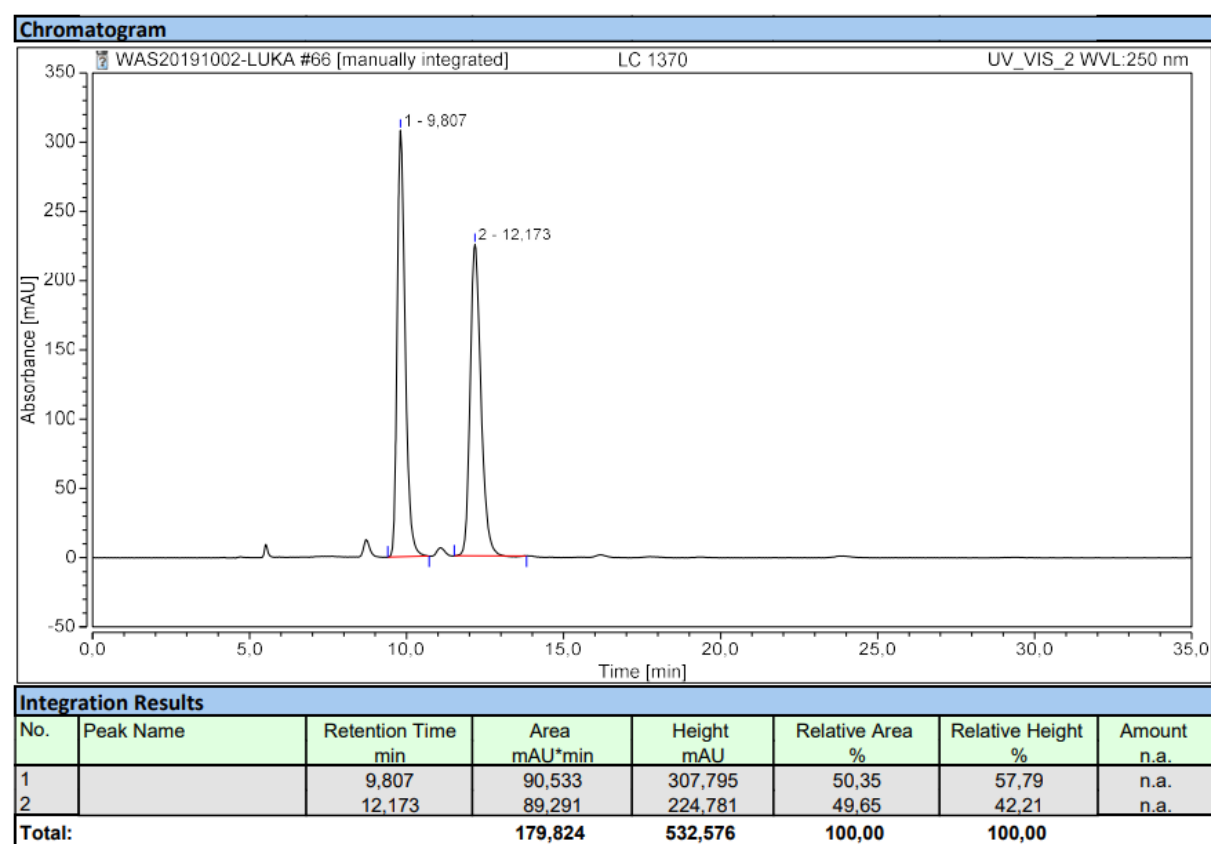

Table S3, Entry 6

| Catalyst |                                                                                             | Yield (%) | ee (%) |
|----------|---------------------------------------------------------------------------------------------|-----------|--------|
| 6        | <b>IX</b> 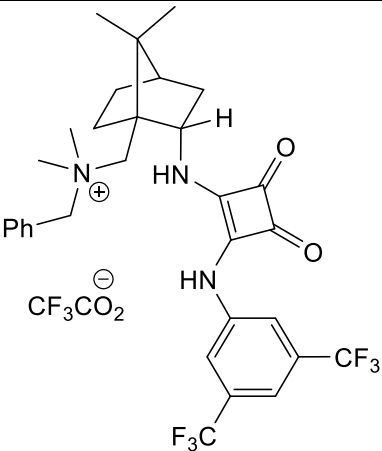 | 98        | 7      |

HPLC: Chiralpak OJ-H, *n*-Hexane/*i*PrOH = 70:30, flow rate 0.7 mL/min,  $\lambda$  = 250 nm, 10°C

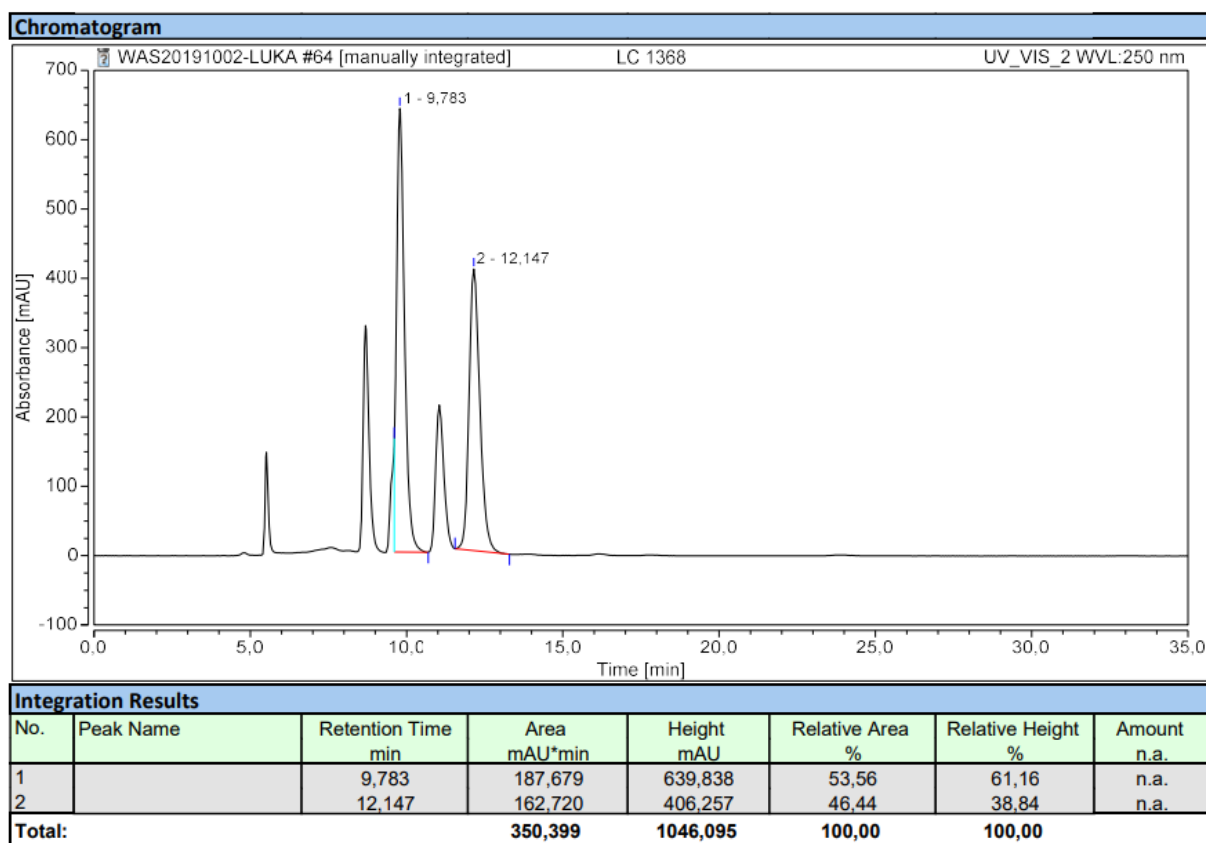

**Table S4.** Evaluation of organocatalysts **III**, **IV**, **VII**, **VIII**, and **IX** in the hydroxylation of  $\beta$ -keto ester **9**.<sup>5</sup> [a]

| <p>Reaction scheme: <b>9</b> + <b>12</b> <math>\xrightarrow[\text{catalyst (5 mol\%), 20h, 0^\circ\text{C, MTBE}}]{\text{H}_2\text{O}_2(\text{aq, 35\%)}}</math> <b>13</b></p> |             |               |        |
|--------------------------------------------------------------------------------------------------------------------------------------------------------------------------------|-------------|---------------|--------|
| Entry                                                                                                                                                                          | Catalyst    | Yield (%)     | ee (%) |
| 1                                                                                                                                                                              | <b>III</b>  | no conversion | -      |
| 2                                                                                                                                                                              | <b>IV</b>   | no conversion | -      |
| 3                                                                                                                                                                              | <b>VII</b>  | no conversion | -      |
| 4                                                                                                                                                                              | <b>VIII</b> | no conversion | -      |
| 5                                                                                                                                                                              | <b>IX</b>   | no conversion | -      |

[a] Into a flame dried Schlenk flask under argon atmosphere at 0°C, a mixture of  $\beta$ -keto ester **9** (0.1 mmol, 24.4 mg,  $\omega$  = 95%), and *N*-(4-bromobenzylidene)-4-methylbenzenesulfonamide (**12**) (1 equivalent, 33.8 mg) was added. Catalyst **III**, **IV**, **VII**, **VIII**, or **IX** (5 mol%) was dissolved in anhydrous methyl *tert*-butyl ether (MTBE, 5 mL) and slowly added via syringe into the reaction mixture. After addition of H<sub>2</sub>O<sub>2</sub> (1 equivalent, 35% in water, 8.6  $\mu$ L), the reaction mixture was stirred for 20 h at room temperature. After 24 h at 25°C, the reaction mixture was filtrated trough a plug of anhydrous Na<sub>2</sub>SO<sub>4</sub> and washed with dichloromethane.

**Table S5.** Evaluation of organocatalysts **IV**, **VIII**, and **IX** in the addition of  $\beta$ -keto ester **9** to tosylaziridine **14**.<sup>6</sup> [a]

| <p>Reaction scheme: <math>\beta</math>-keto ester <b>9</b> + tosylaziridine <b>14</b> <math>\xrightarrow[\text{toluene, 24h, 25}^\circ\text{C}]{\text{catalyst (5 mol\%), K}_3\text{PO}_4(\text{s}) (2 \text{ eq.})}</math> product <b>15</b>.</p> |             |               |               |
|----------------------------------------------------------------------------------------------------------------------------------------------------------------------------------------------------------------------------------------------------|-------------|---------------|---------------|
| Entry                                                                                                                                                                                                                                              | Catalyst    | Yield (%)     | <i>ee</i> (%) |
| 1                                                                                                                                                                                                                                                  | <b>IV</b>   | no conversion | -             |
| 2                                                                                                                                                                                                                                                  | <b>VIII</b> | no conversion | -             |
| 3                                                                                                                                                                                                                                                  | <b>IX</b>   | no conversion | -             |

[a] To a mixture of  $\beta$ -keto ester **9** (0.1 mmol, 24.4 mg,  $\omega$  = 95%), catalyst **IV**, **VIII**, or **IX** (5 mol%), and  $\text{K}_3\text{PO}_4$  (2 equivalents, 42 mg) in toluene (2.5 mL) under argon atmosphere 2-phenyl-1-tosylaziridine (**14**) (2 equivalent, 54.6 mg) was added and stirred at room temperature for 24 h. After 24 h at 25°C, the reaction mixture was filtrated trough a plug of anhydrous  $\text{Na}_2\text{SO}_4$  and washed with dichloromethane.

**Table S6.** Evaluation of organocatalysts **I**, **III–V**, **VII**, **VIII**, and **IX** in the addition of *tert*-butyl 2-((diphenylmethylene)amino)acetate (**16**) to methyl acrylate (**17**).<sup>7 [a]</sup>

| Entry             | Catalyst    | Yield <sup>[b]</sup> (%) | <i>ee</i> <sup>[c]</sup> (%) |
|-------------------|-------------|--------------------------|------------------------------|
| 1                 | <b>I</b>    | no conversion            | -                            |
| 2                 | <b>III</b>  | 79                       | 5 ( <i>S</i> )               |
| 3                 | <b>IV</b>   | no conversion            | -                            |
| 4                 | <b>V</b>    | 63                       | 6 ( <i>S</i> )               |
| 5                 | <b>VII</b>  | no conversion            | -                            |
| 6                 | <b>VIII</b> | 73                       | 10 ( <i>S</i> )              |
| 7                 | <b>IX</b>   | no conversion            | -                            |
| 8 <sup>[d]</sup>  | <b>V</b>    | 58                       | 11 ( <i>S</i> )              |
| 9 <sup>[e]</sup>  | <b>V</b>    | 98                       | 1 ( <i>S</i> )               |
| 10 <sup>[f]</sup> | <b>V</b>    | no conversion            | -                            |
| 11 <sup>[g]</sup> | <b>IV</b>   | no conversion            | -                            |
| 12 <sup>[h]</sup> | <b>IV</b>   | 58                       | 1 ( <i>S</i> )               |

[a] Degassed toluene (2.5 mL) was added to a mixture of *tert*-butyl 2-((diphenylmethylene)amino)acetate (**16**) (0.05 mmol, 14.8 mg), catalyst **I**, **III–V**, **VII**, **VIII**, or **IX** (10 mol%), and Cs<sub>2</sub>CO<sub>3</sub> (1.5 equivalents, 48.8 mg) in a Schlenk tube, then methyl acrylate (**17**) (1.5 equivalents, 6.8  $\mu$ L) was added. After 24 h at 25°C, the reaction mixture was filtrated trough a plug of anhydrous Na<sub>2</sub>SO<sub>4</sub> and washed with ethyl acetate. The volatiles were evaporated *in vacuo*. The crude product **18** was purified by column chromatography (Silica gel 60, EtOAc/Heptane = 1 : 15). [b] Reaction yield determined after isolation with column chromatography (Silica gel 60, EtOAc/Heptane = 1 : 15). [c] *ee* determined by HPLC (Chiralpak AD-H, *n*-Hexane/*i*-PrOH = 95:5, flow rate 0.5 mL/min,  $\lambda$  = 250 nm, 10°C) after filtration trough a plug of Na<sub>2</sub>SO<sub>4</sub>. [d] Reaction in methyl *tert*-butyl ether (MTBE). [e] Reaction in dichloromethane. [f] Reaction proceeded at 0°C. [g] 2 equivalents of Cs<sub>2</sub>CO<sub>3</sub> were used. [h] 10 equivalents of Cs<sub>2</sub>CO<sub>3</sub> were used.

Table S6, Entry 2

| Catalyst                                                                                              | Yield (%) | ee (%) |
|-------------------------------------------------------------------------------------------------------|-----------|--------|
| <p>2 <b>III</b></p> 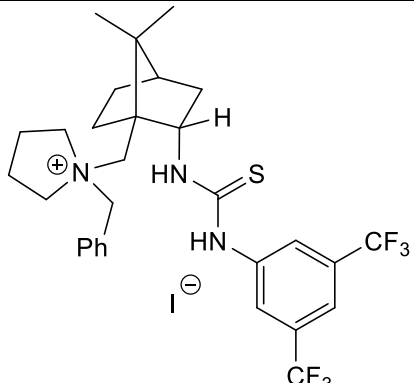 | 79        | 5 (S)  |

HPLC: Chiralpak AD-H, *n*-Hexane/*i*PrOH = 95:5, flow rate 0.5 mL/min,  $\lambda$  = 250 nm, 10°C

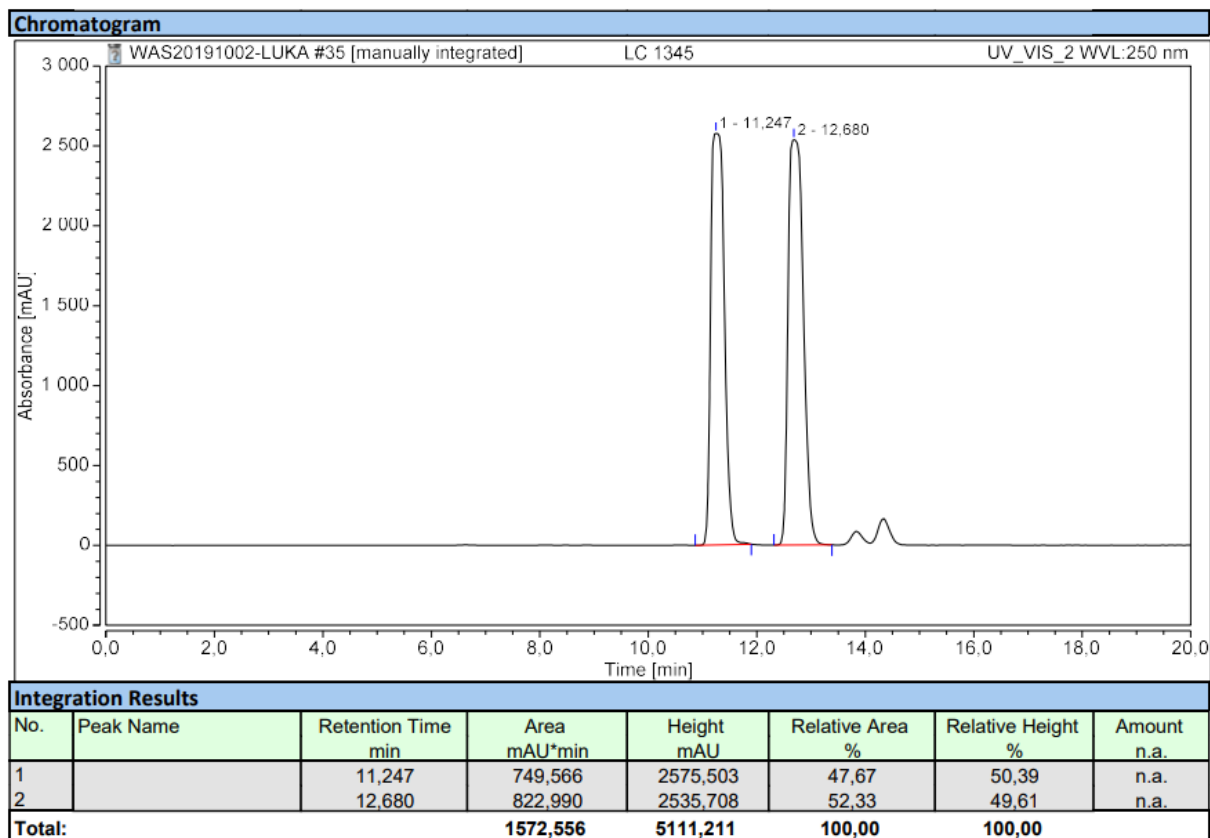

Table S6, Entry 4

| Catalyst                                                                                     | Yield (%) | ee (%)         |
|----------------------------------------------------------------------------------------------|-----------|----------------|
| 4 <b>V</b> 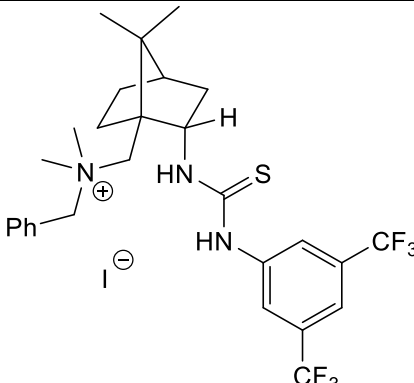 | 63        | 6 ( <i>S</i> ) |

HPLC: Chiralpak AD-H, *n*-Hexane/*i*PrOH = 95:5, flow rate 0.5 mL/min,  $\lambda$  = 250 nm, 10°C

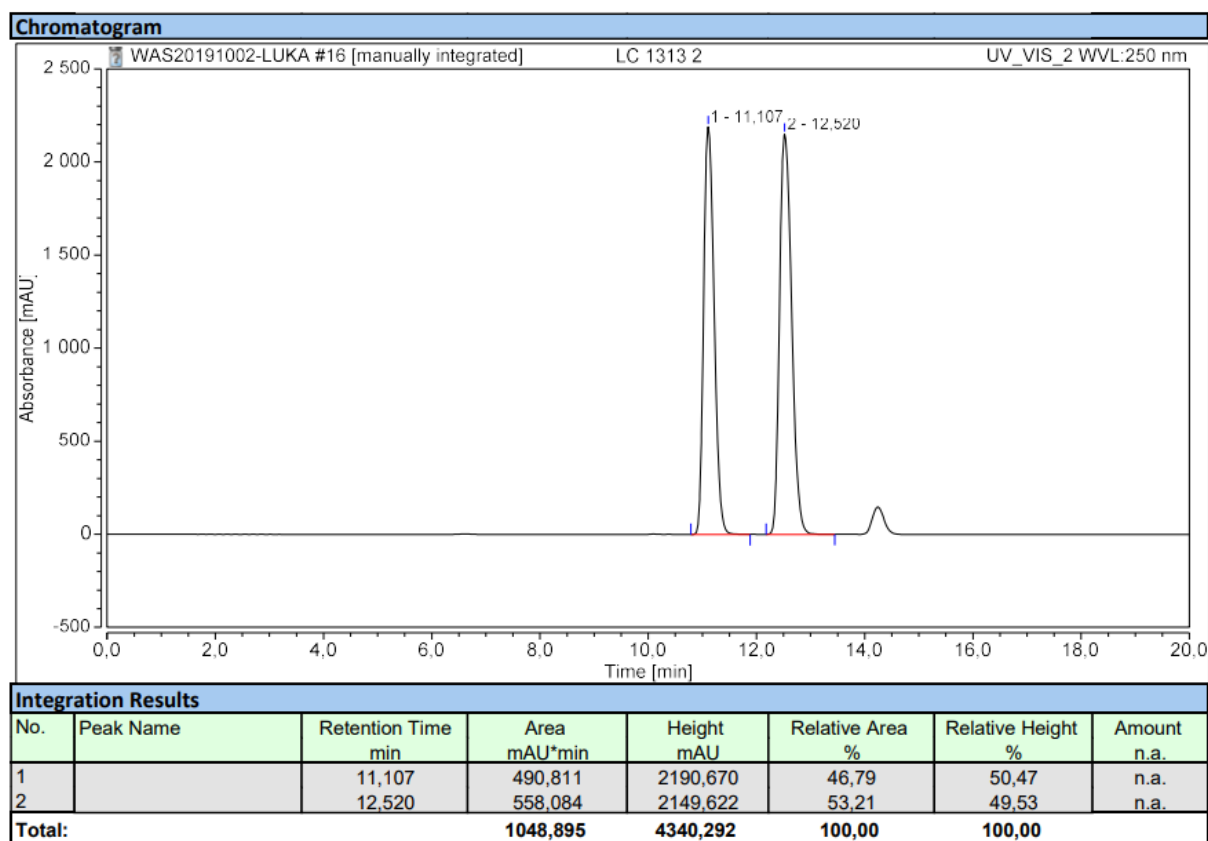



Table S6, Entry 6

| Catalyst                                                                                               | Yield (%) | ee (%)          |
|--------------------------------------------------------------------------------------------------------|-----------|-----------------|
| <p>6 <b>VIII</b></p> 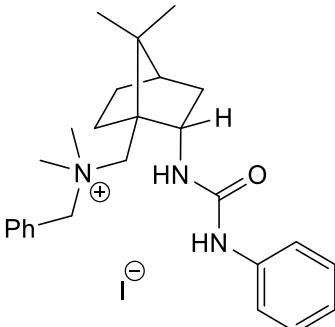 | 73        | 10 ( <i>S</i> ) |

HPLC: Chiralpak AD-H, *n*-Hexane/*i*PrOH = 95:5, flow rate 0.5 mL/min,  $\lambda$  = 250 nm, 10°C

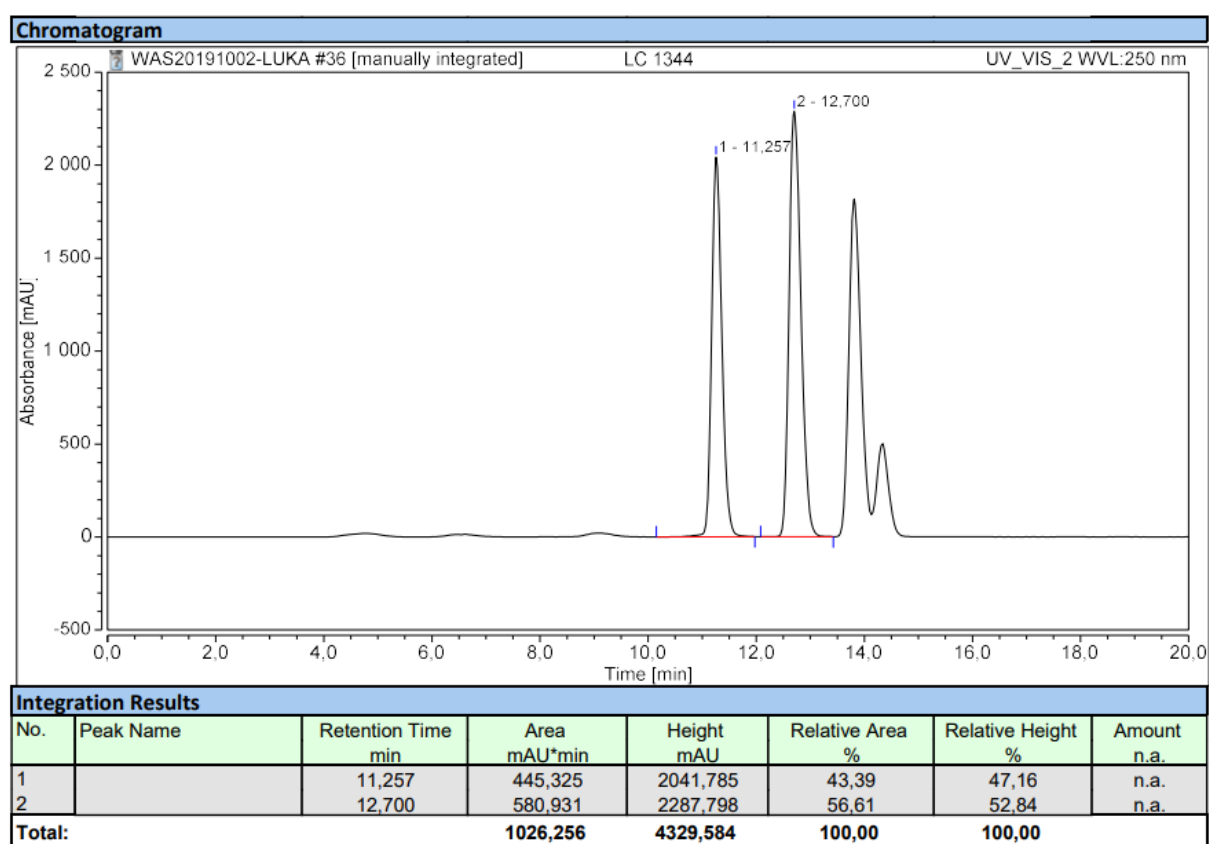

|   | Catalyst | Yield (%) | ee (%)          |
|---|----------|-----------|-----------------|
| 8 | <p>V</p> | 58        | 11 ( <i>S</i> ) |

**Chromatogram**

WAS20191002-LUKA #51 [manually integrated] LC 1348 UV\_VIS\_2 WVL:250 nm

The chromatogram displays absorbance in milliabsorbance units (mAU) on the y-axis (ranging from -50 to 300) against time in minutes on the x-axis (ranging from 0.0 to 20.0). Two distinct peaks are labeled: Peak 1 at 10.687 minutes and Peak 2 at 11.910 minutes. A red horizontal line is drawn across the baseline at approximately 0 mAU, and a blue vertical line marks the start of the integration window at 10.0 minutes.

| Peak No.      | Retention Time (min) | Area (mAU*min) | Height (mAU)   | Relative Area (%) | Relative Height (%) | Amount |
|---------------|----------------------|----------------|----------------|-------------------|---------------------|--------|
| 1             | 10.687               | 29,095         | 152,766        | 44,47             | 47,64               | n.a.   |
| 2             | 11.910               | 36,324         | 167,910        | 55,53             | 52,36               | n.a.   |
| <b>Total:</b> |                      | <b>65,419</b>  | <b>320,676</b> | <b>100,00</b>     | <b>100,00</b>       |        |

Table S6, Entry 9

| Catalyst                                                                                     | Yield (%) | ee (%)         |
|----------------------------------------------------------------------------------------------|-----------|----------------|
| 9 <b>V</b> 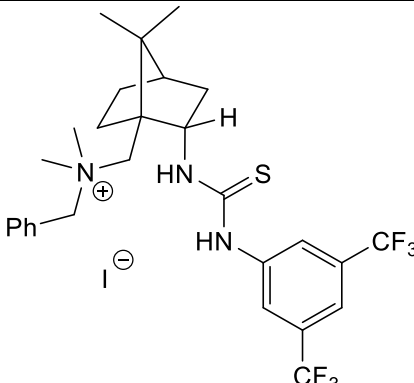 | 98        | 1 ( <i>S</i> ) |

HPLC: Chiralpak AD-H, *n*-Hexane/*i*PrOH = 95:5, flow rate 0.5 mL/min,  $\lambda$  = 250 nm, 10°C

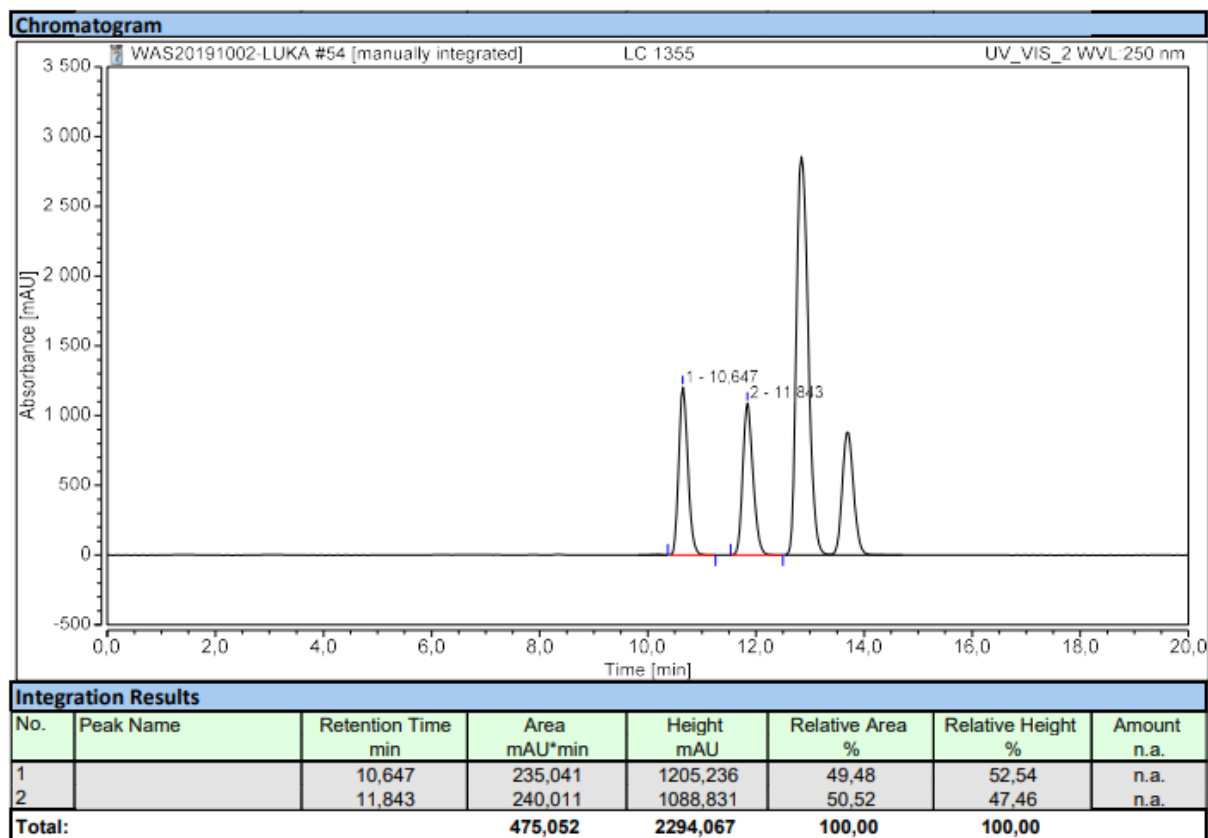

Table S6, Entry 12

| Catalyst |                                                                                             | Yield (%) | ee (%) |
|----------|---------------------------------------------------------------------------------------------|-----------|--------|
| 12       | <b>IV</b> 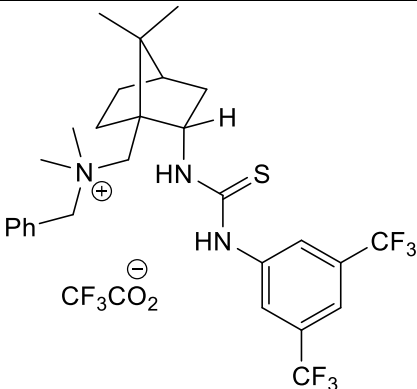 | 58        | 1 (S)  |

HPLC: Chiralpak AD-H, *n*-Hexane/*i*PrOH = 95:5, flow rate 0.5 mL/min,  $\lambda$  = 250 nm, 10°C

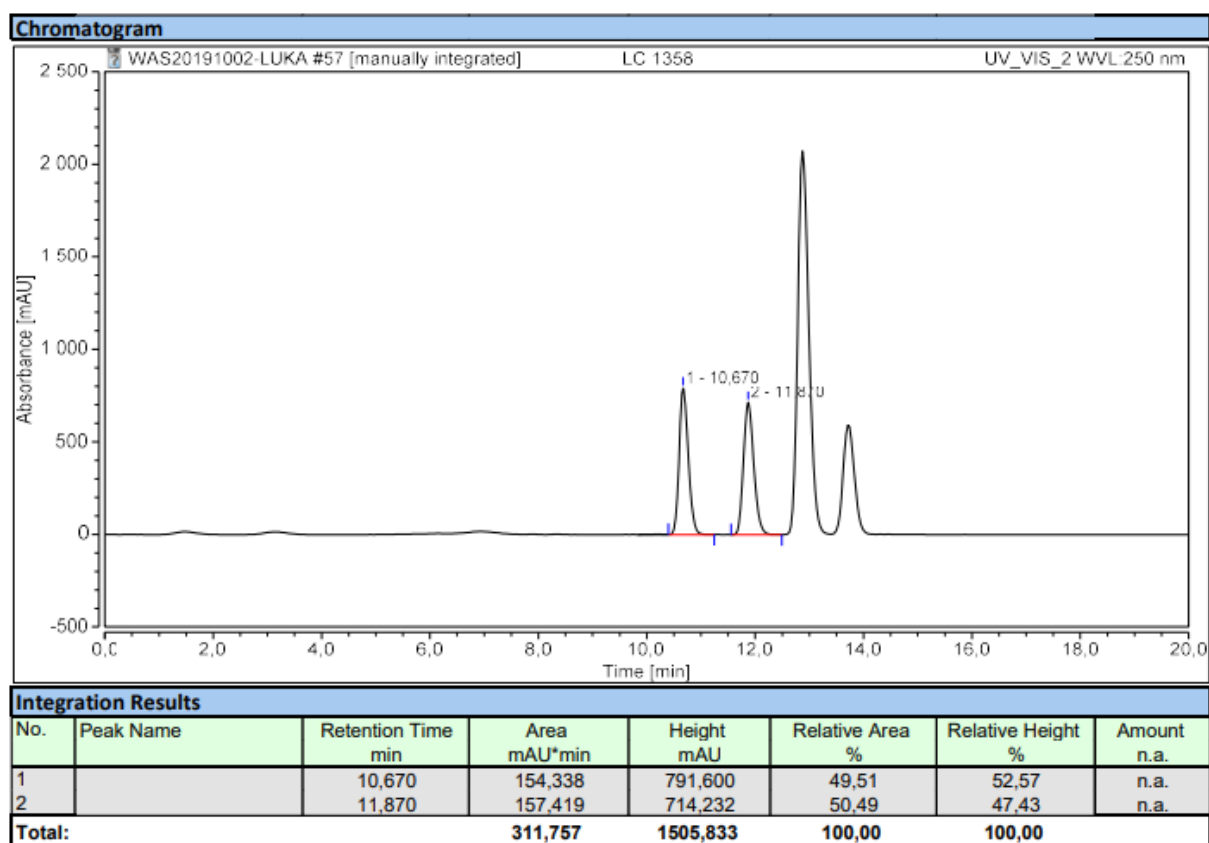

### 3. Copies of $^1\text{H}$ - and $^{13}\text{C}$ -NMR spectra

#### (1*S*,2*S*,4*R*)-1-((Dimethylamino)methyl)-7,7-dimethylbicyclo[2.2.1]heptan-2-amine (1a)

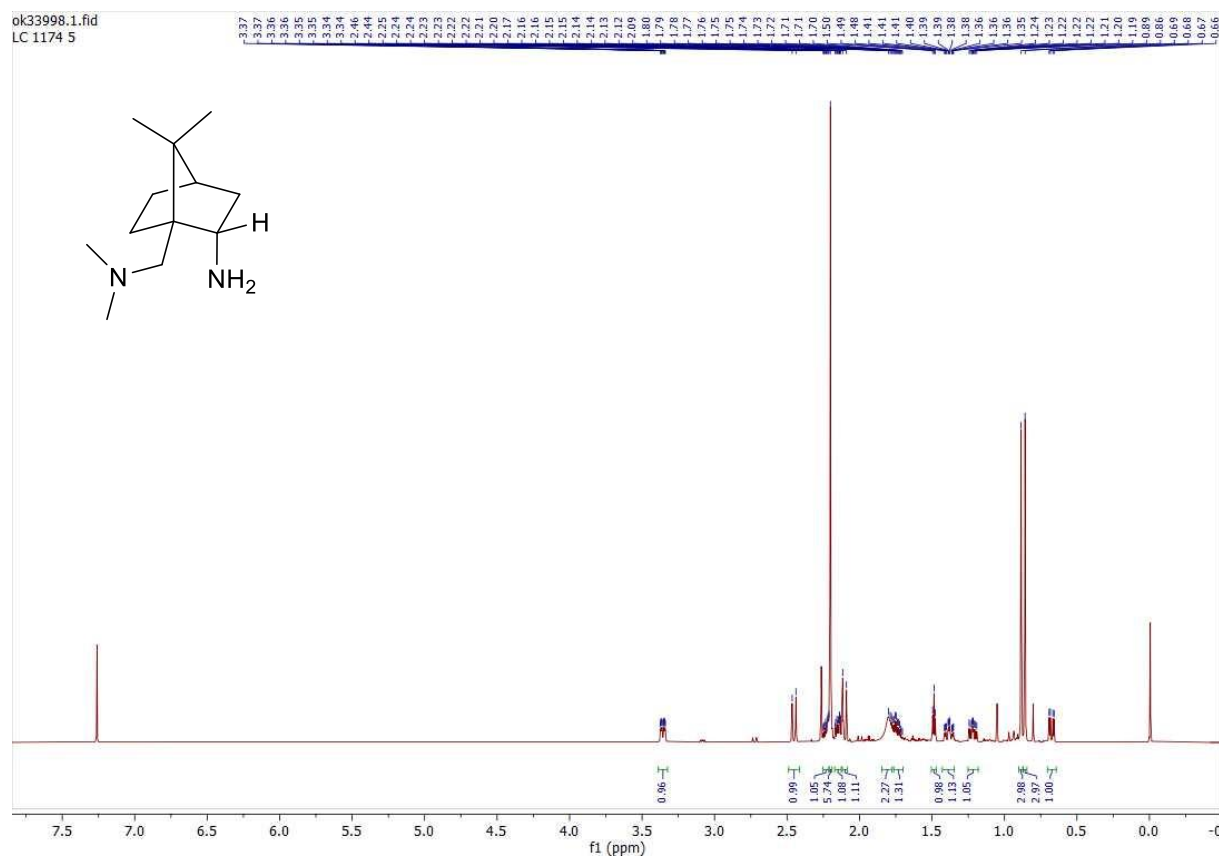

**(1*S*,2*R*,4*R*)-1-((Dimethylamino)methyl)-7,7-dimethylbicyclo[2.2.1]heptan-2-amine (2a)**

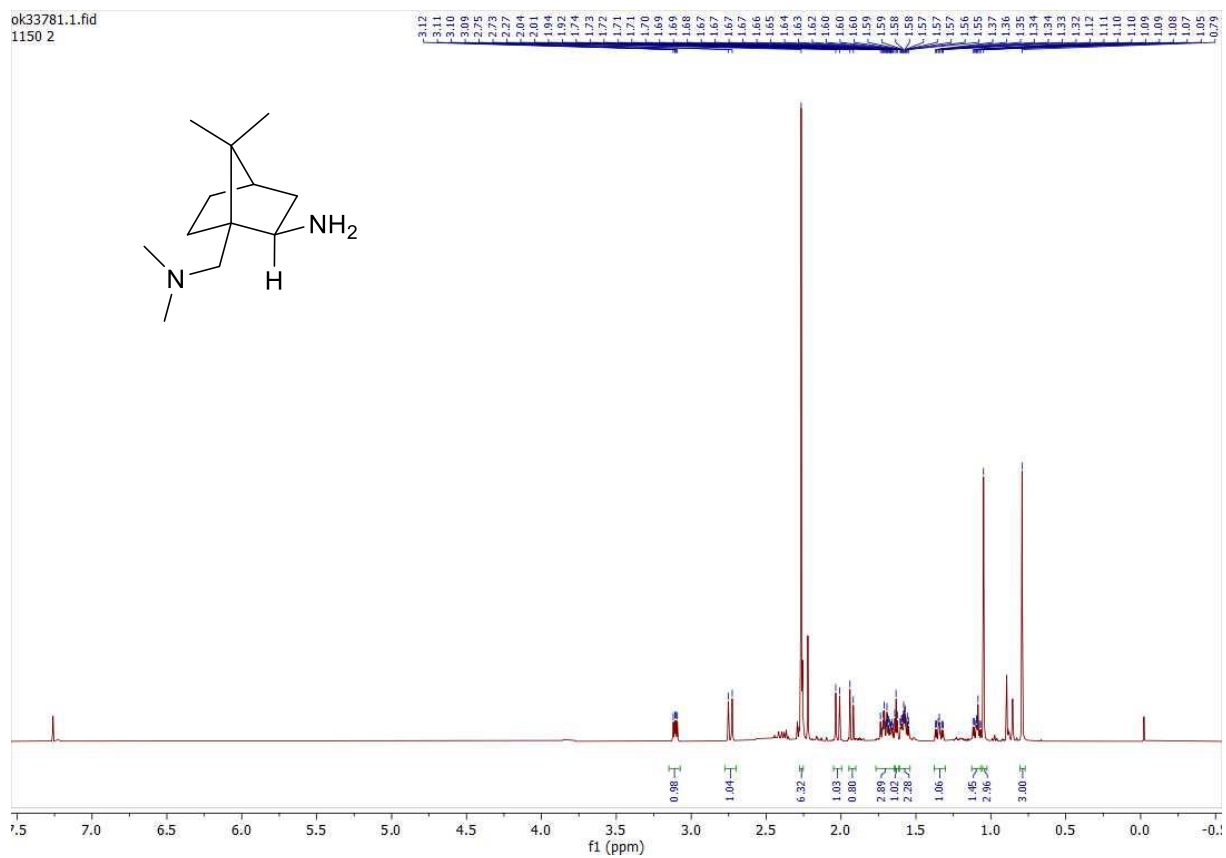

***tert*-Butyl ((1*S*,2*S*,4*R*)-1-((dimethylamino)methyl)-7,7-dimethylbicyclo[2.2.1]heptan-2-yl)carbamate (**3a**)**

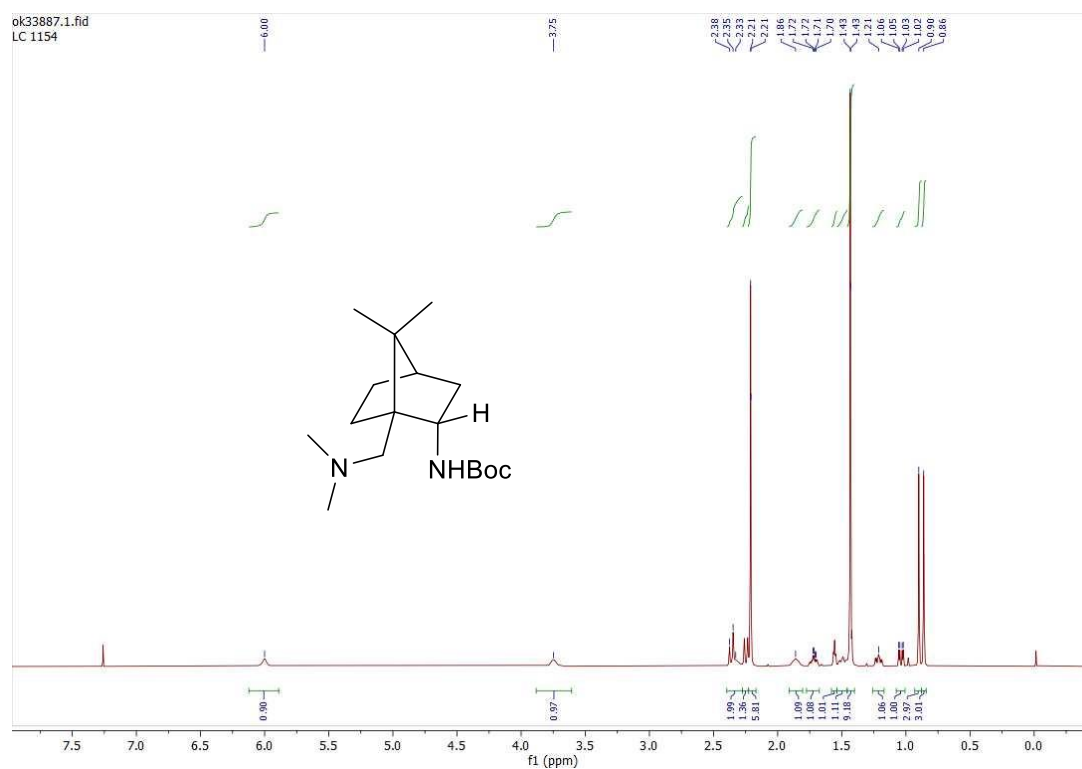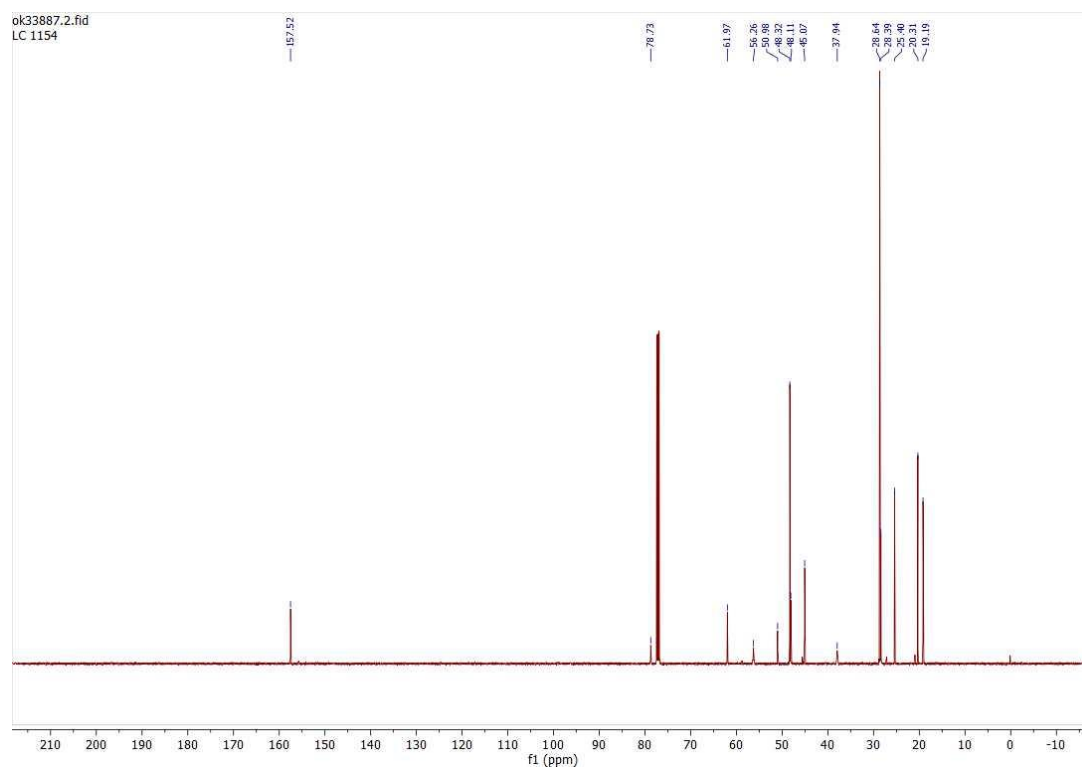

***tert*-Butyl ((1*S*,2*R*,4*R*)-1-((dimethylamino)methyl)-7,7-dimethylbicyclo[2.2.1]heptan-2-yl)carbamate (4a)**

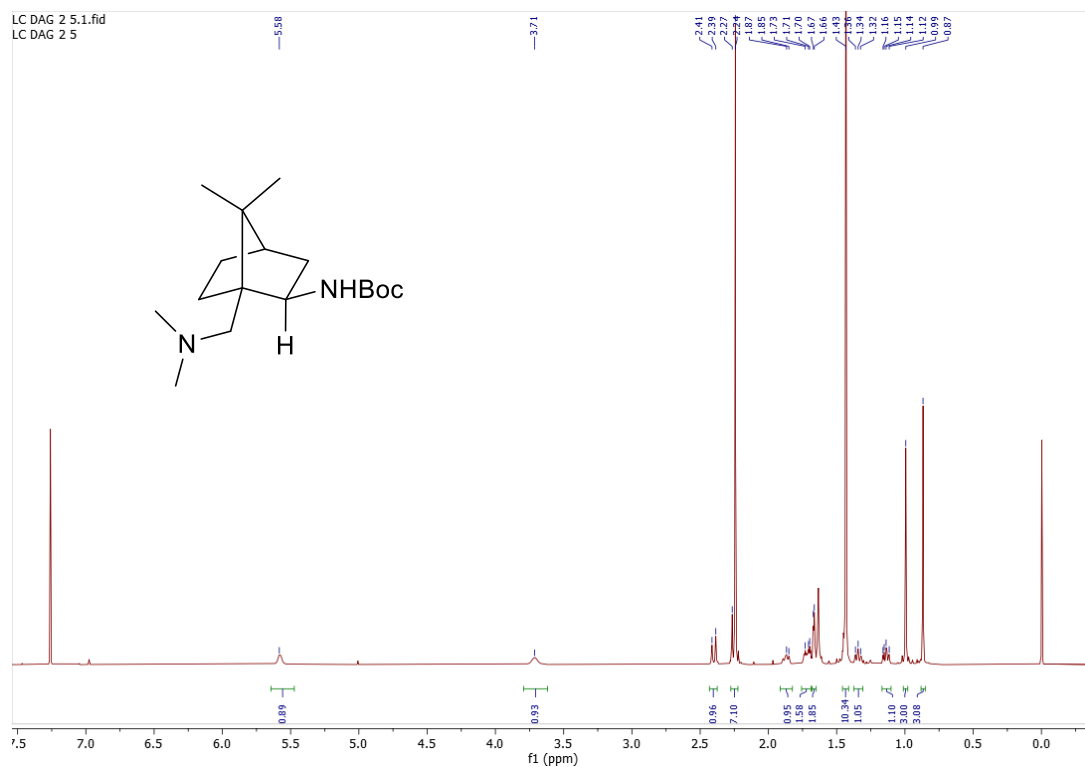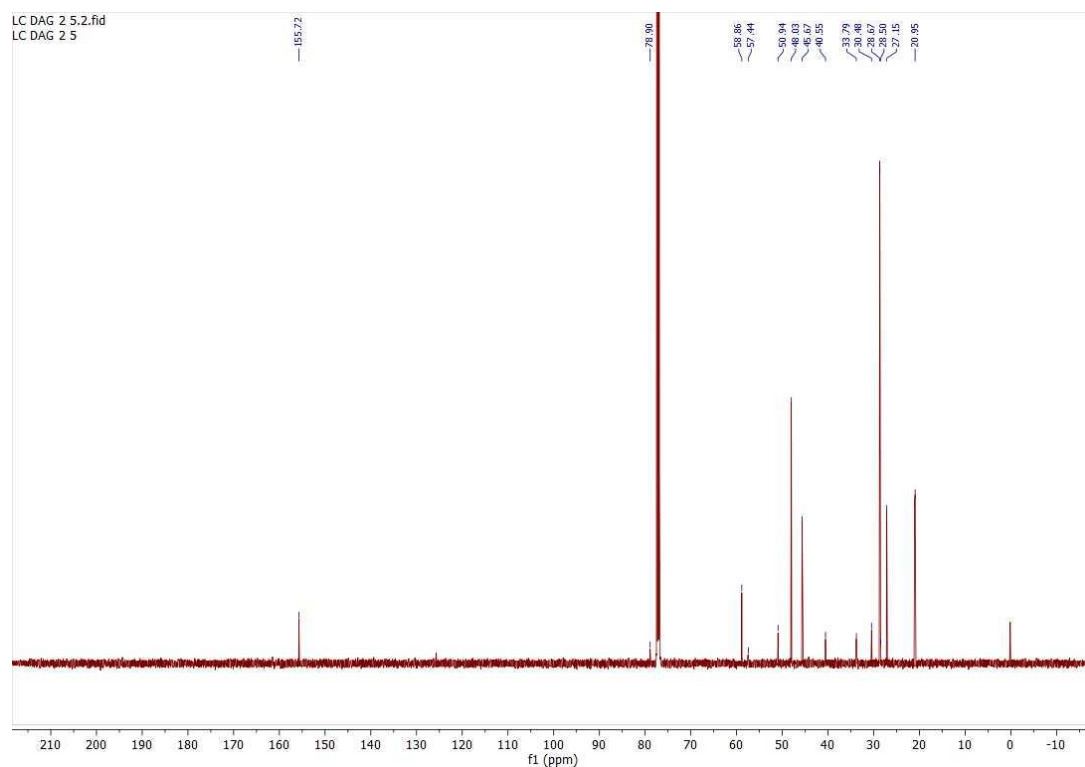



***tert*-Butyl ((1*S*,2*S*,4*R*)-7,7-dimethyl-1-(pyrrolidin-1-ylmethyl)bicyclo[2.2.1]heptan-2-yl)carbamate (3b)**

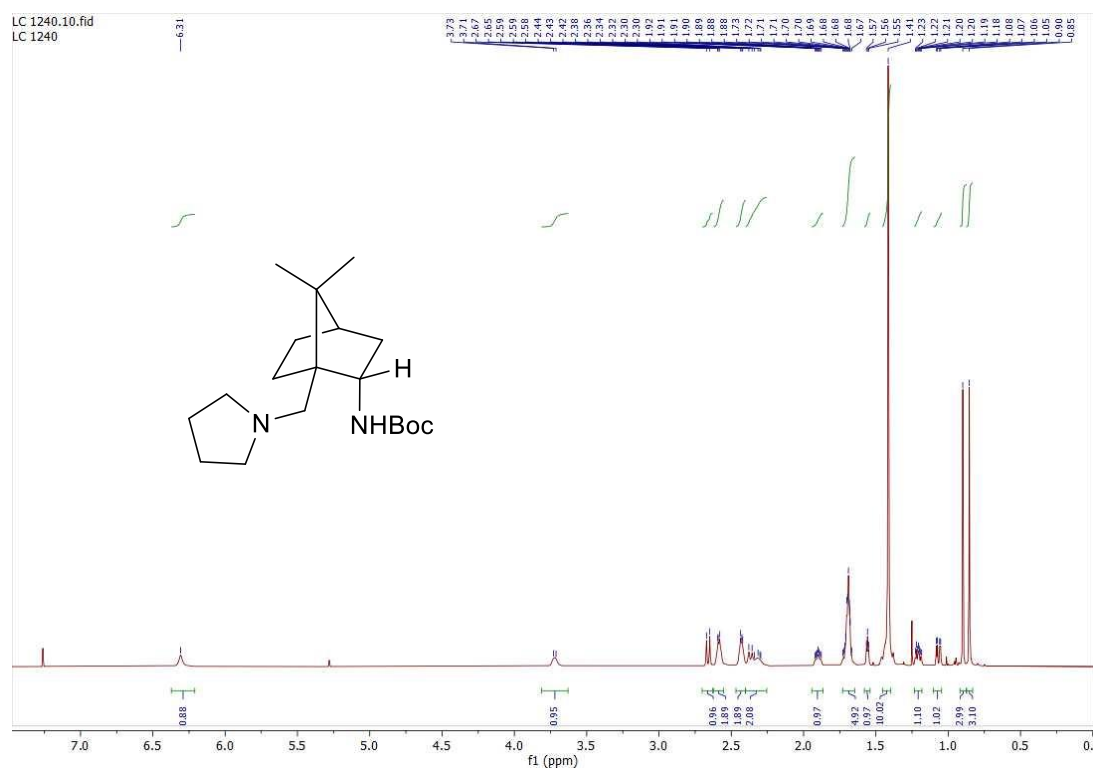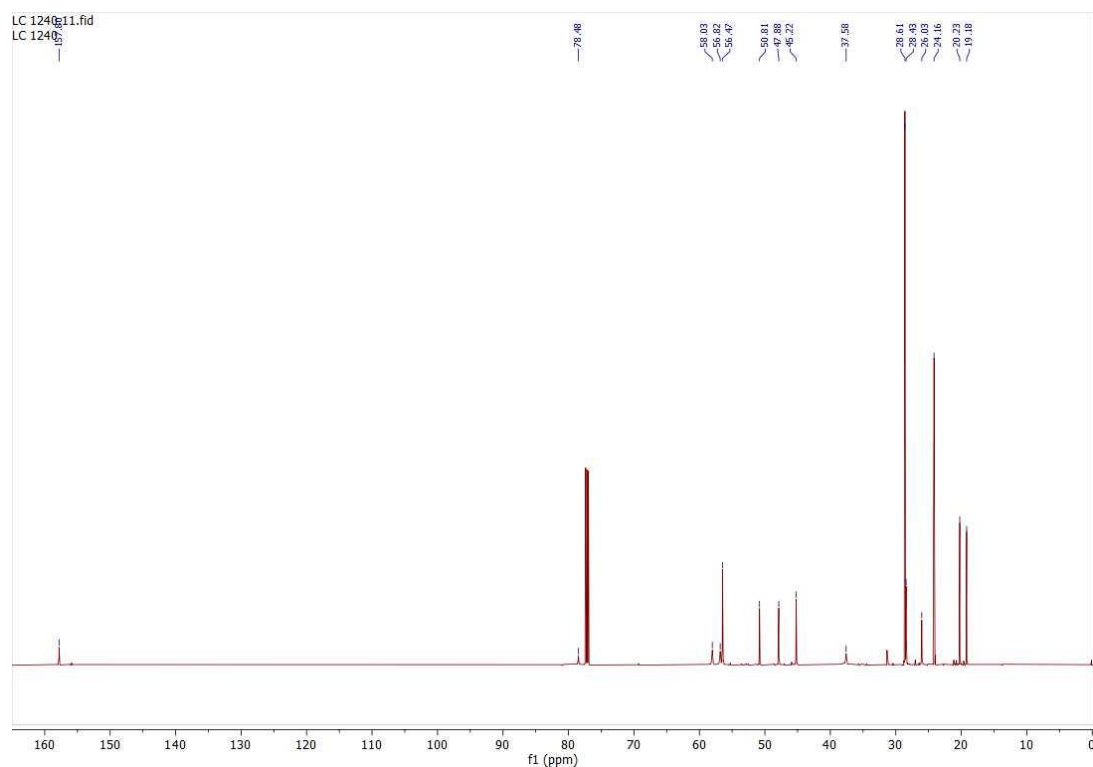

***N*-Benzyl-1-((1*S*,2*S*,4*R*)-2-((*tert*-butoxycarbonyl)amino)-7,7-dimethylbicyclo[2.2.1]heptan-1-yl)-*N,N*-dimethylmethanaminium bromide (5a)**

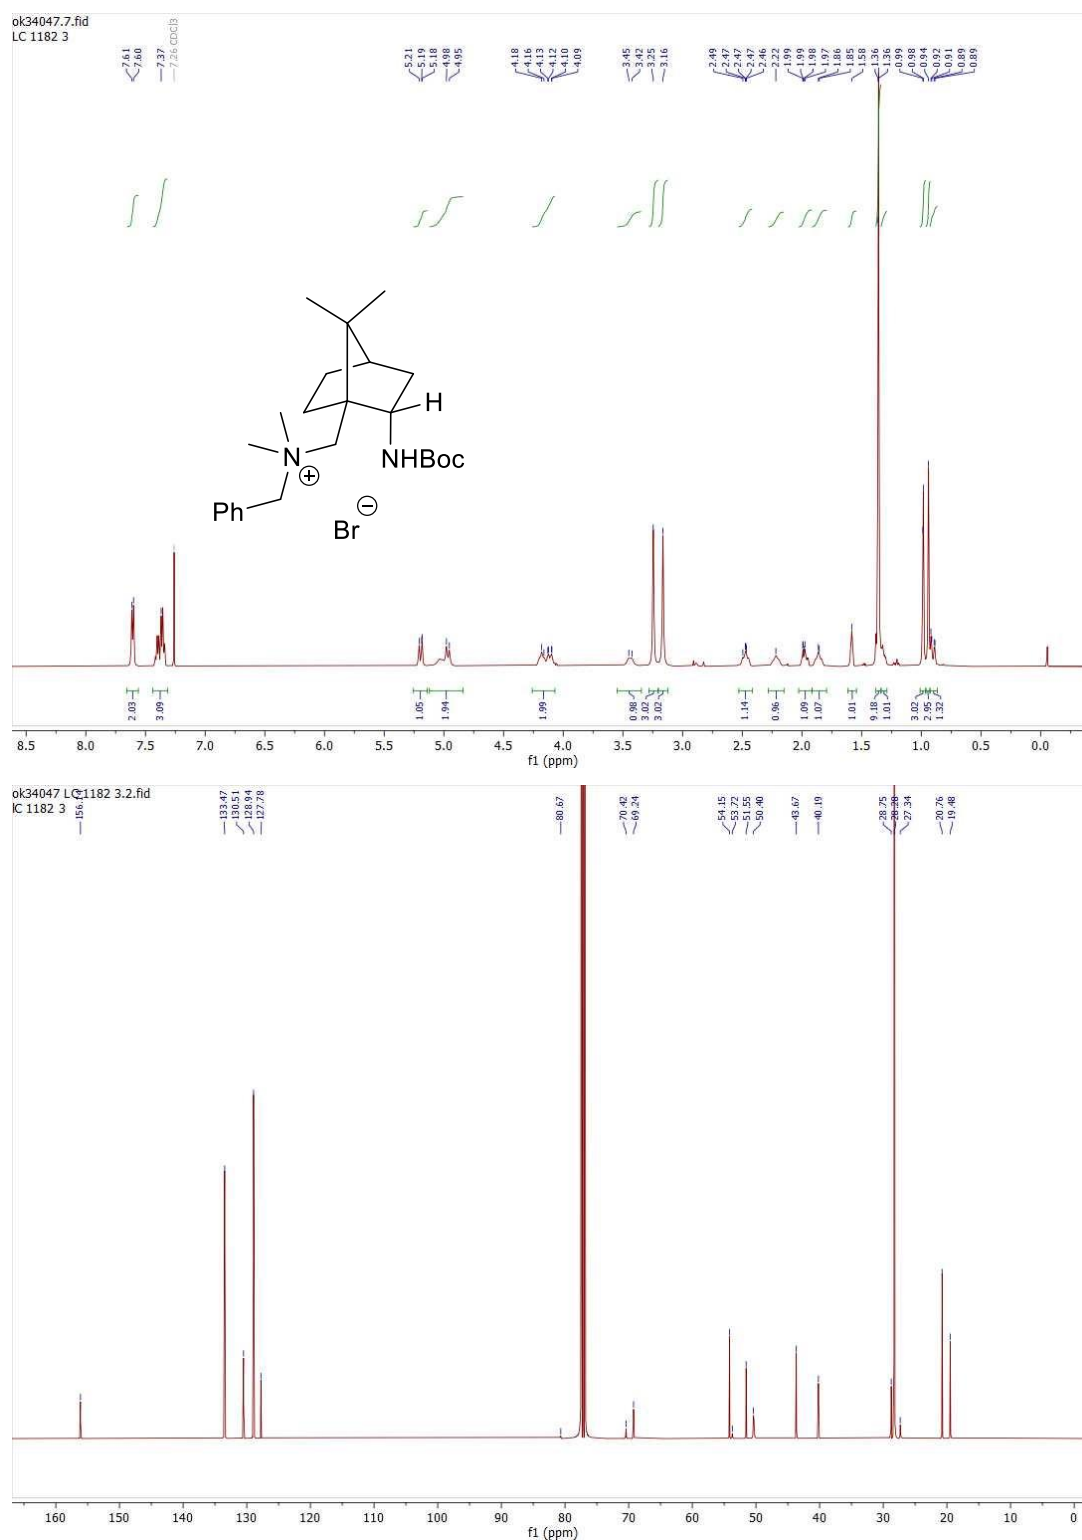

[illegible]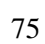

**1-Benzyl-1-(((1*S*,2*S*,4*R*)-2-((*tert*-butoxycarbonyl)amino)-7,7-dimethylbicyclo[2.2.1]heptan-1-yl)methyl)pyrrolidin-1-ium bromide (5b)**

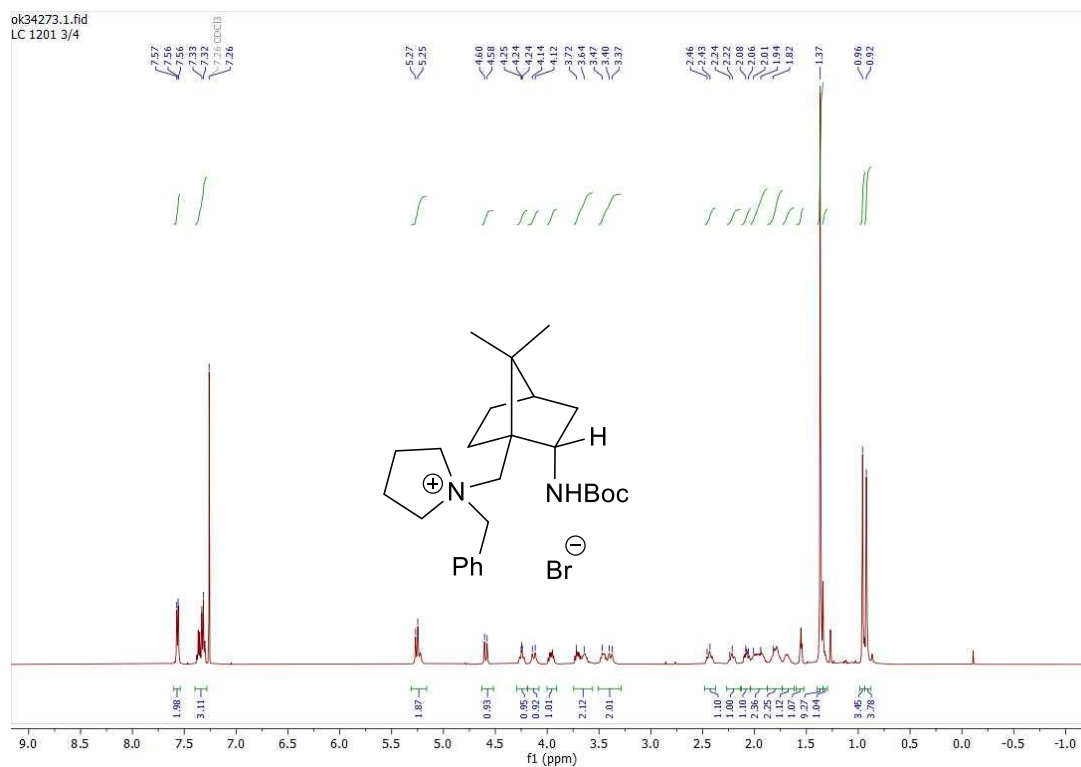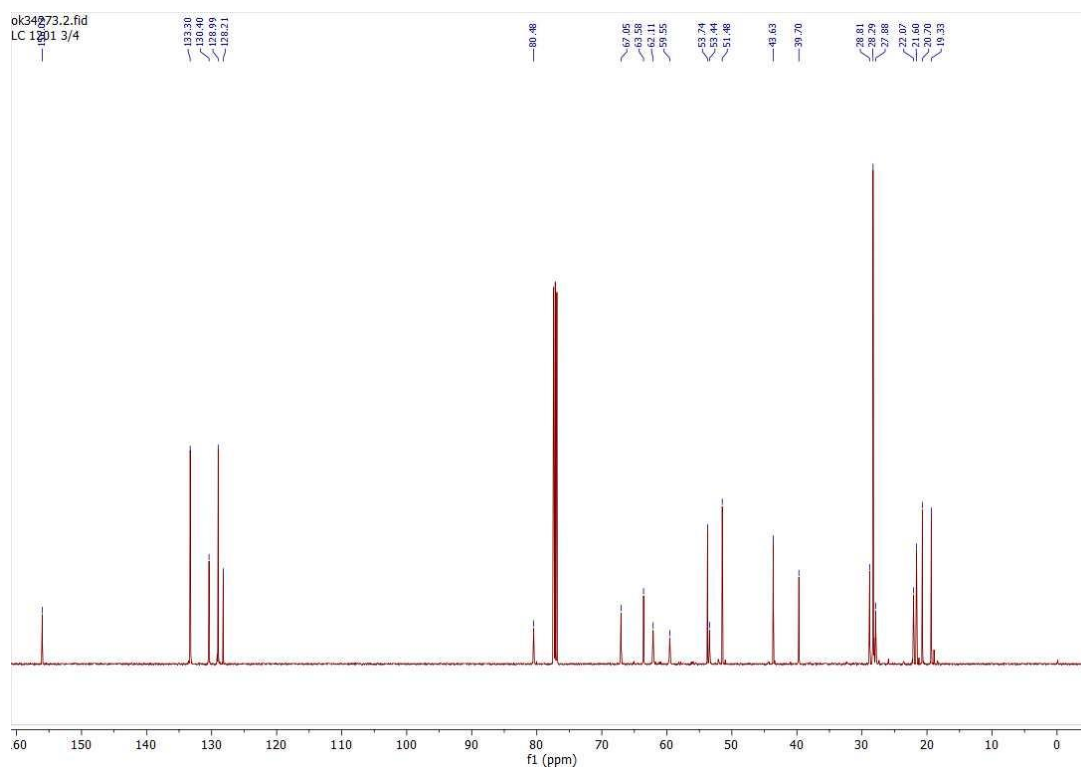

**(1*S*,2*S*,4*R*)-1-((Benzyldimethylammonio)methyl)-7,7-dimethylbicyclo[2.2.1]heptan-2-aminium 2,2,2-trifluoroacetate (7a)**

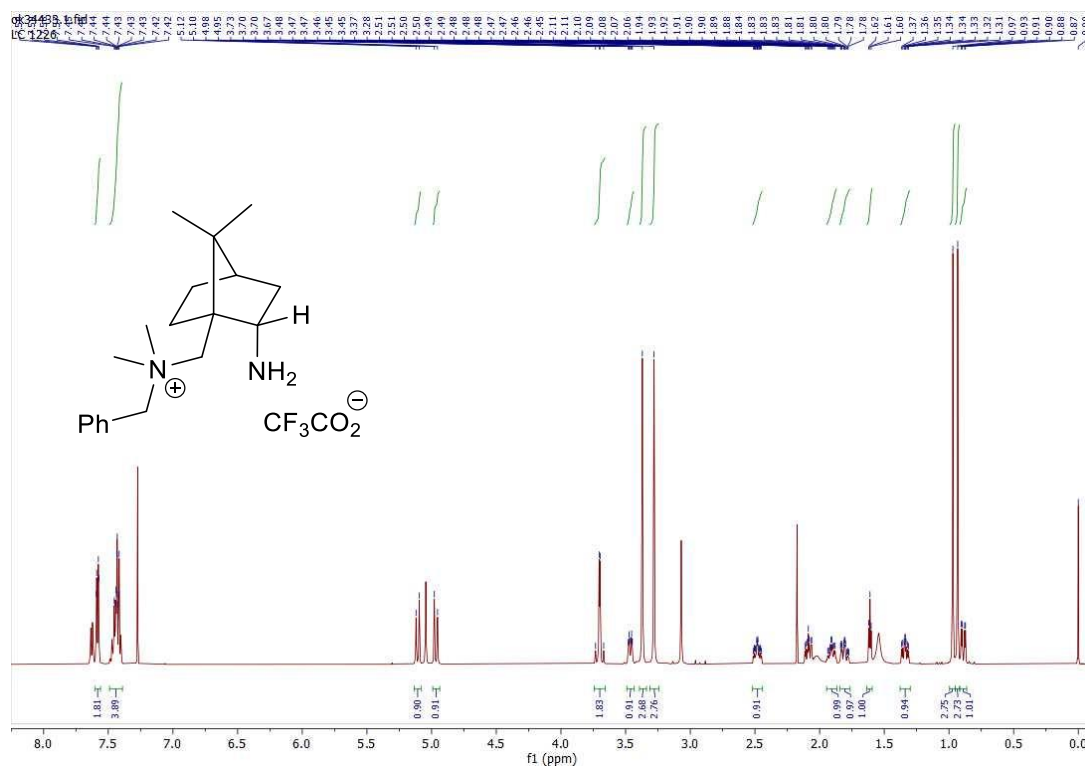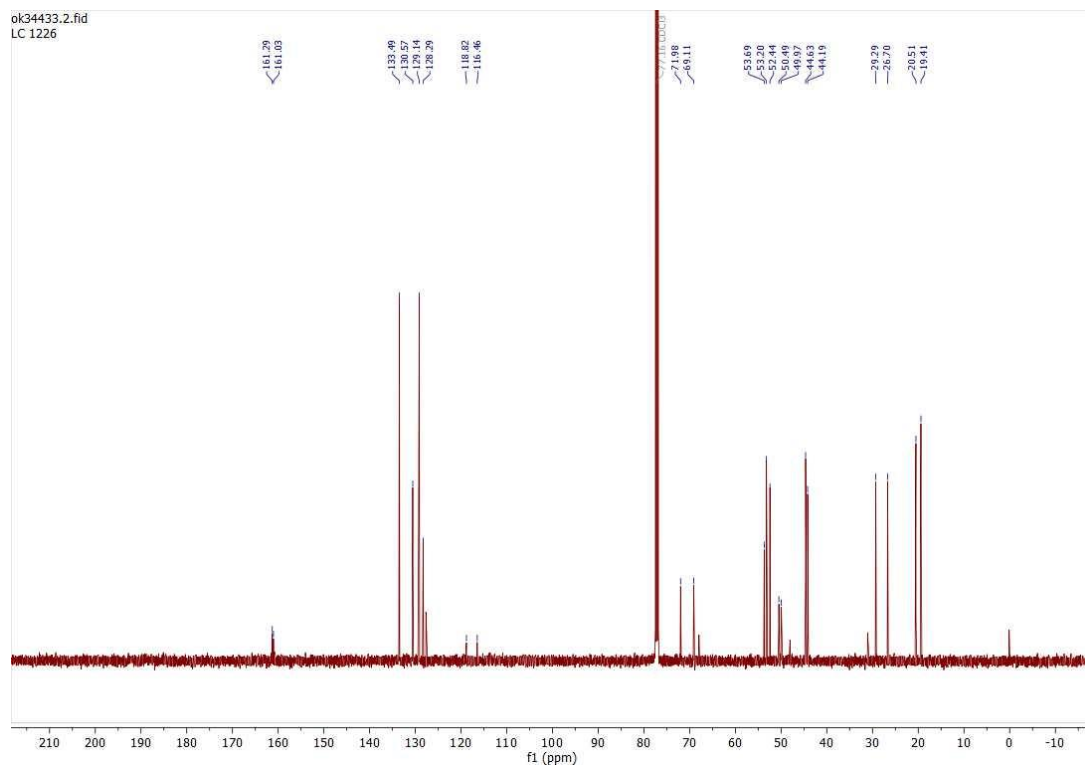

[illegible]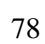

**1-(((1S,2S,4R)-2-Ammonio-7,7-dimethylbicyclo[2.2.1]heptan-1-yl)methyl)-1-benzylpyrrolidin-1-ium iodide (7b)**

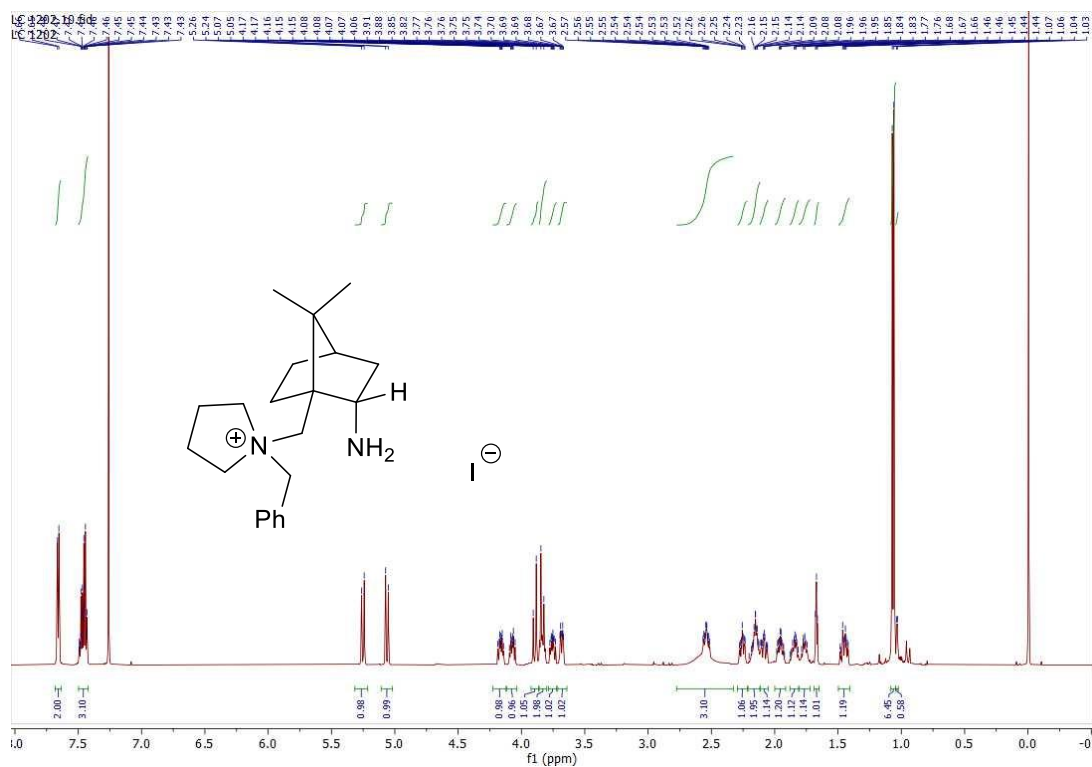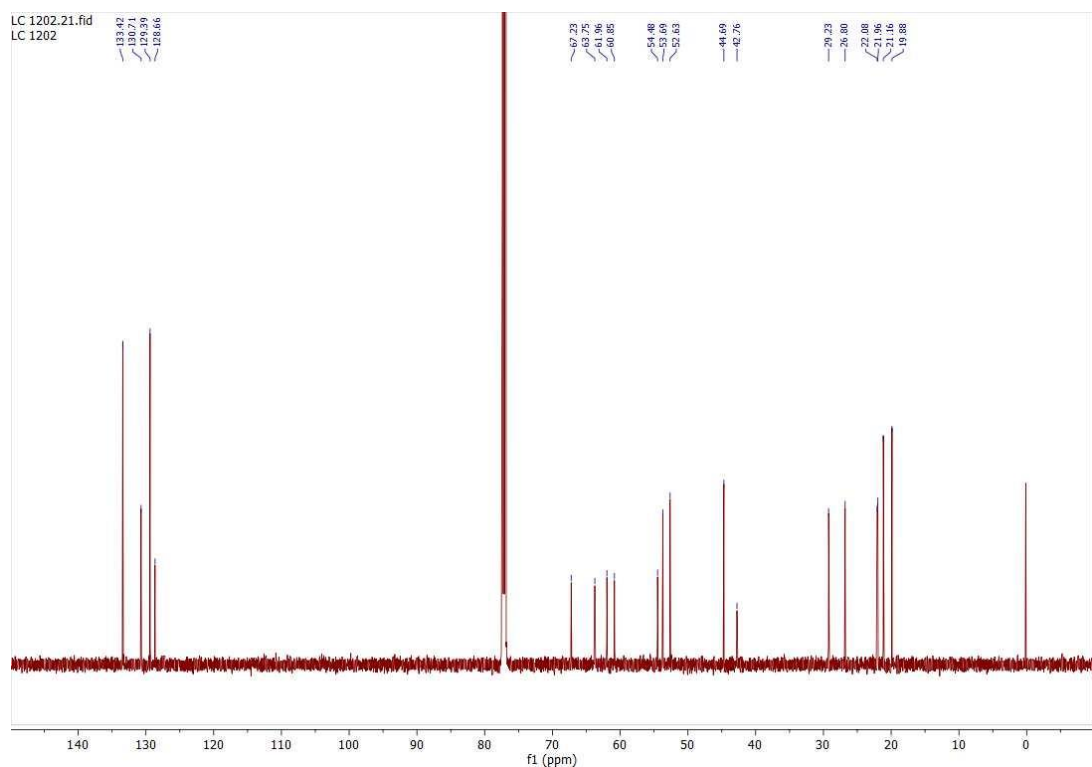

***N*-Benzyl-1-((1*R*,2*R*,4*R*)-2-(3-(3,5-bis(trifluoromethyl)phenyl)thioureido)-7,7-dimethylbicyclo[2.2.1]heptan-1-yl)-*N,N*-dimethylmethanaminium 2,2,2-trifluoroacetate**

**(I)**

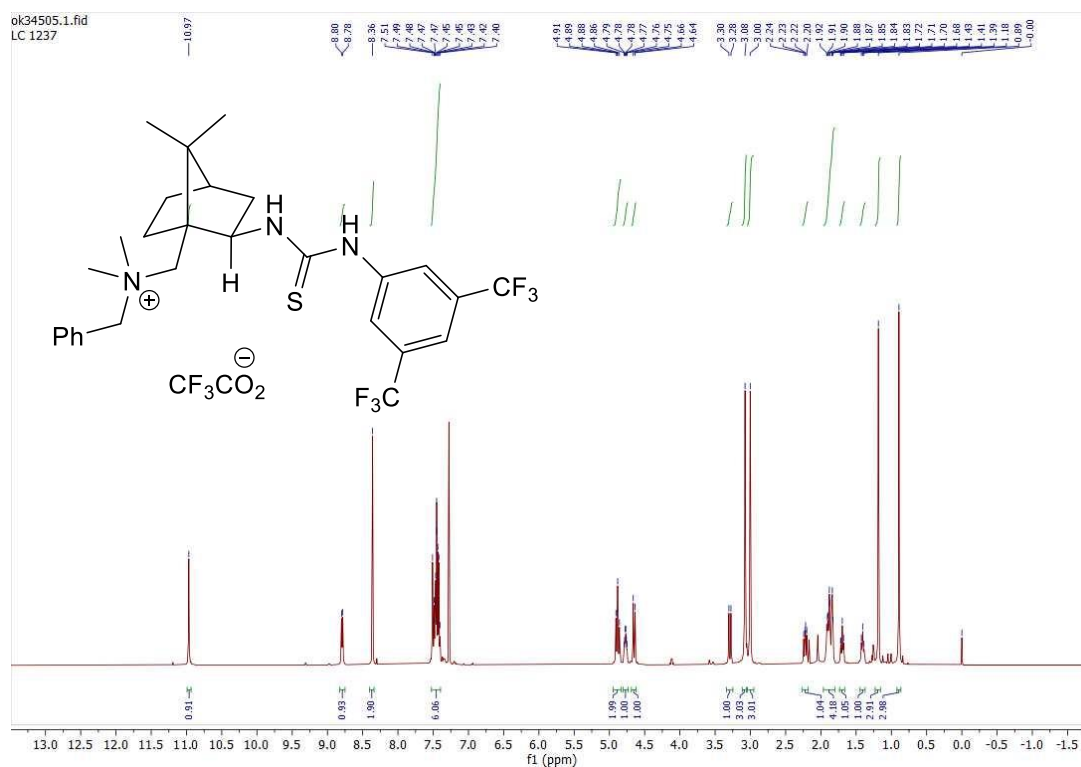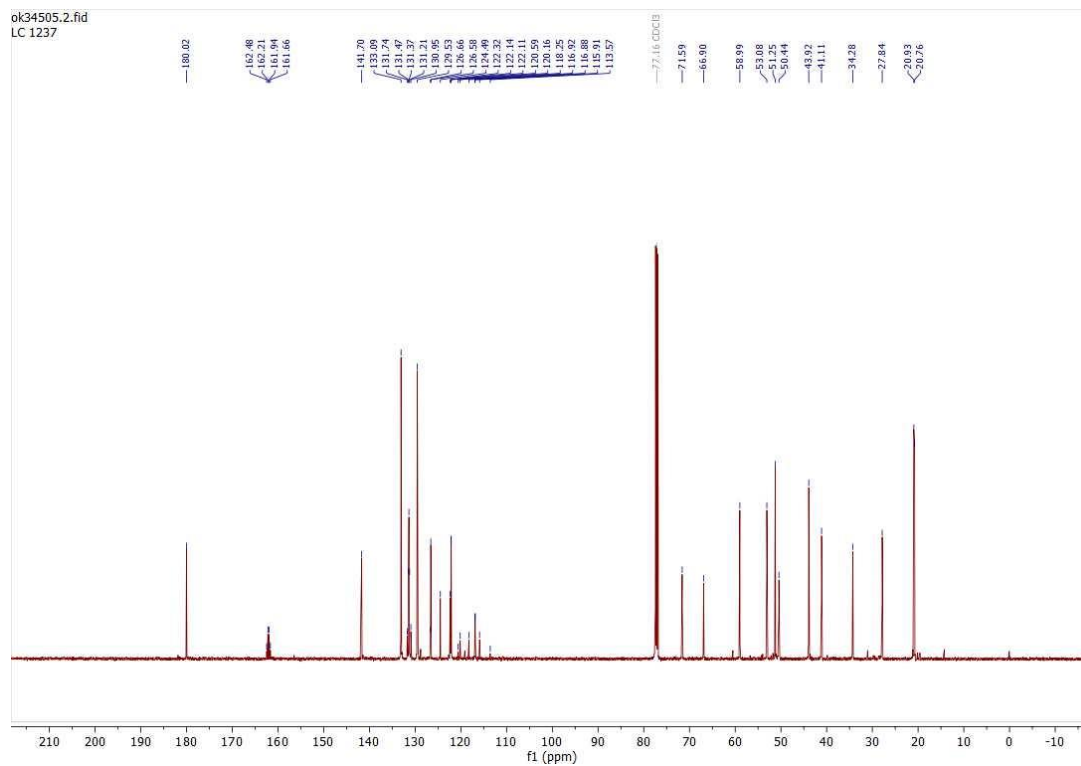



## NOESY

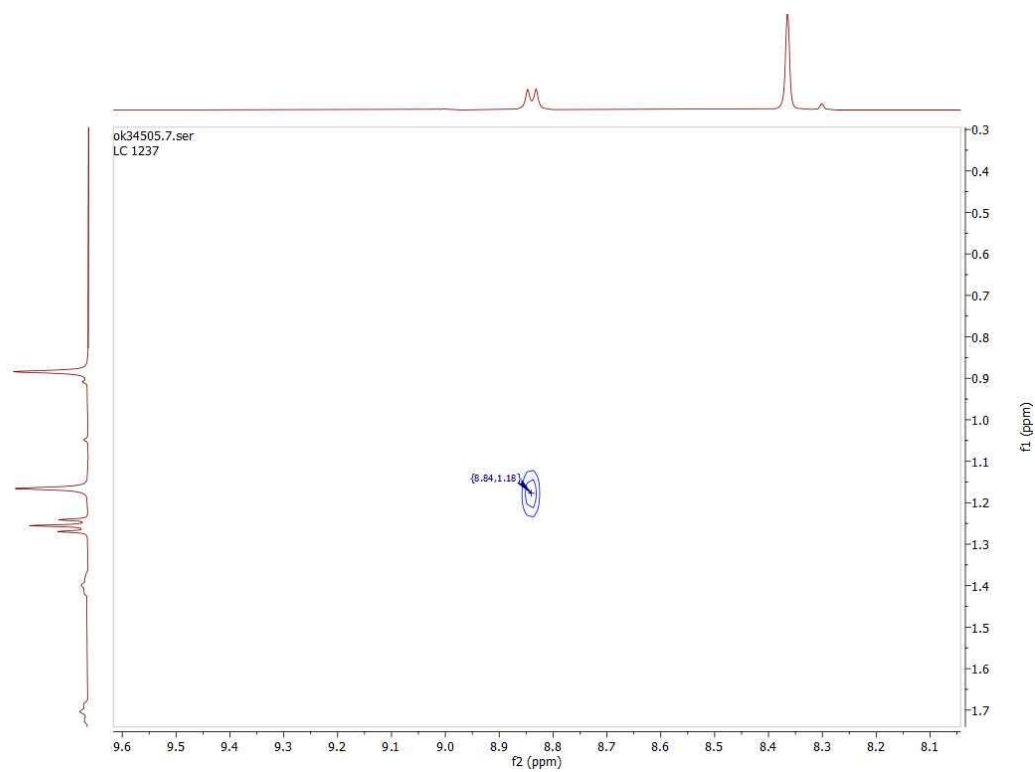

## $^{19}\text{F}$ -NMR

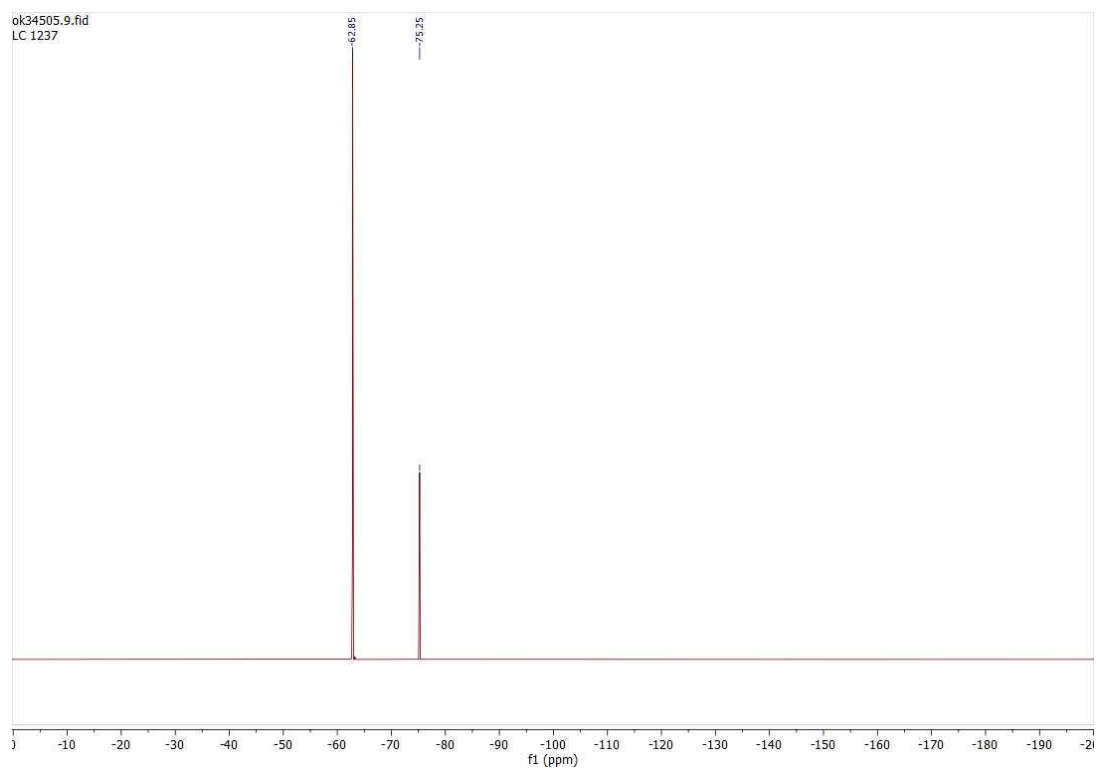

***N*-Benzyl-1-((1*R*,2*R*,4*R*)-2-(3-(3,5-bis(trifluoromethyl)phenyl)thioureido)-7,7-dimethylbicyclo[2.2.1]heptan-1-yl)-*N,N*-dimethylmethanaminium iodide (II)**

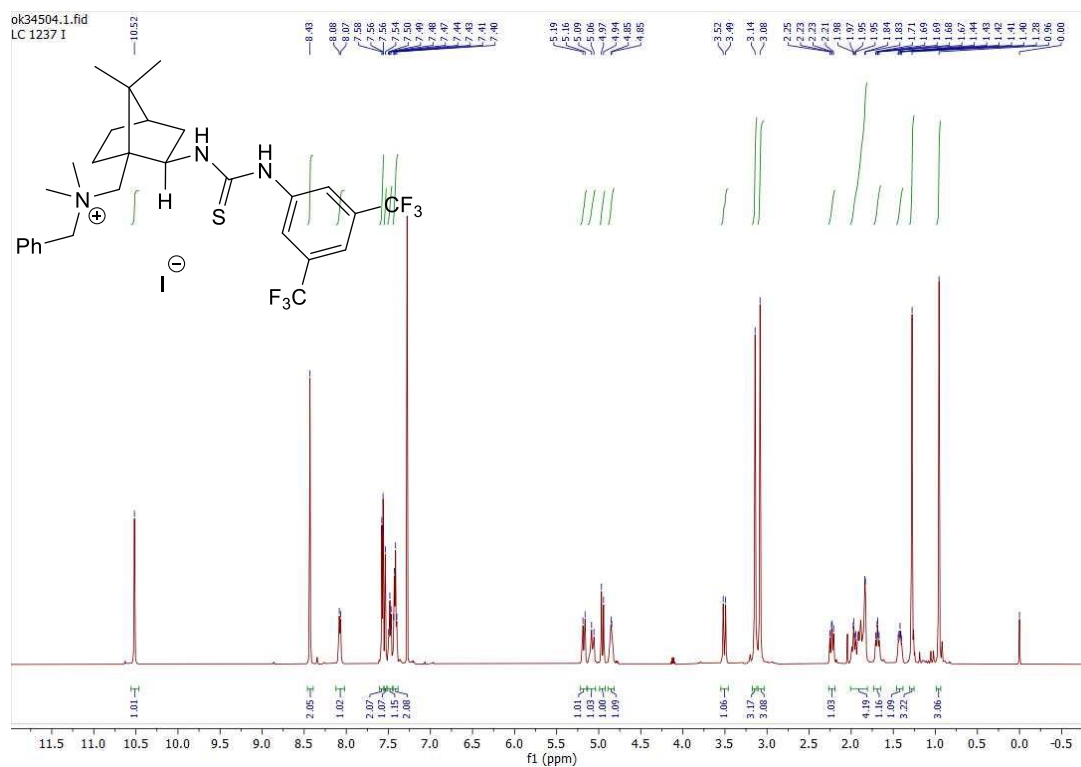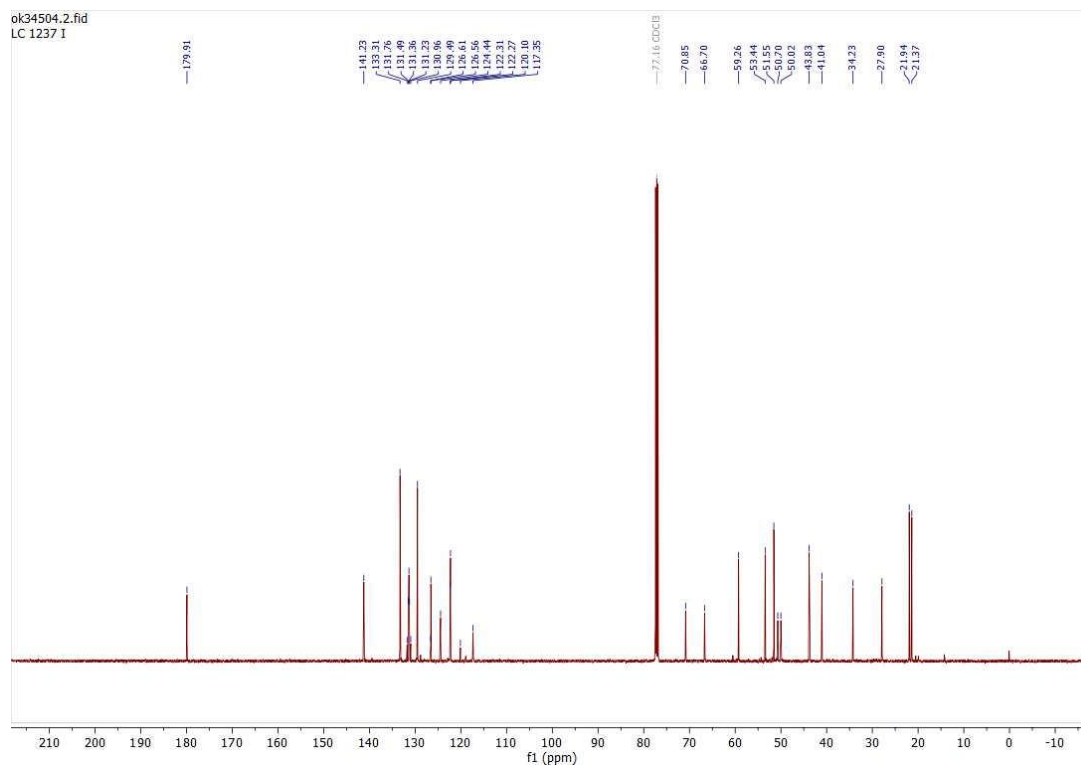

## NOESY

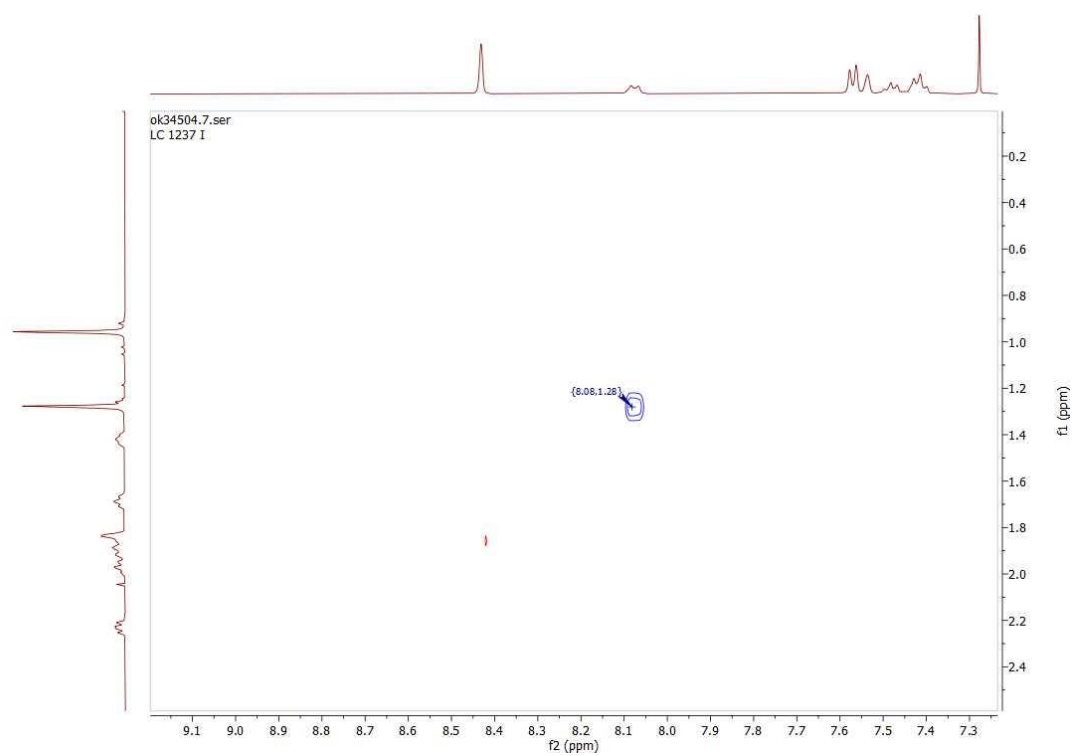

## $^{19}\text{F}$ -NMR

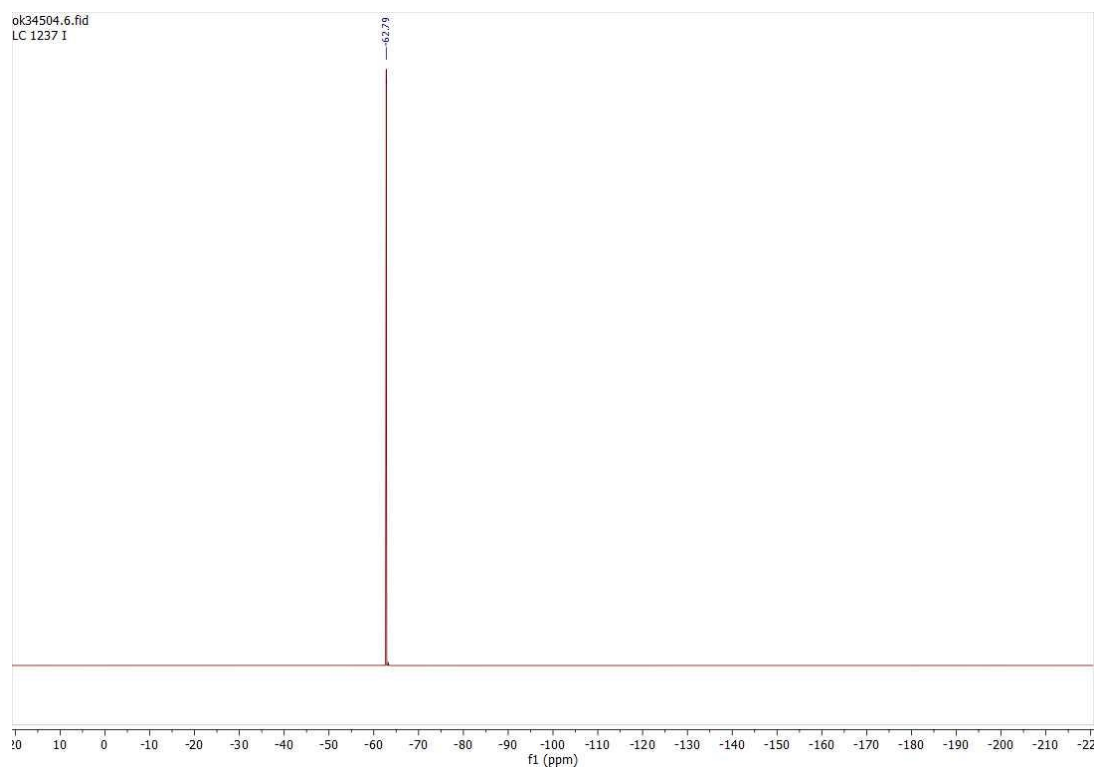

**1-Benzyl-1-(((1*S*,2*S*,4*R*)-2-(3-(3,5-bis(trifluoromethyl)phenyl)thioureido)-7,7-dimethylbicyclo[2.2.1]heptan-1-yl)methyl)pyrrolidin-1-ium iodide (III)**

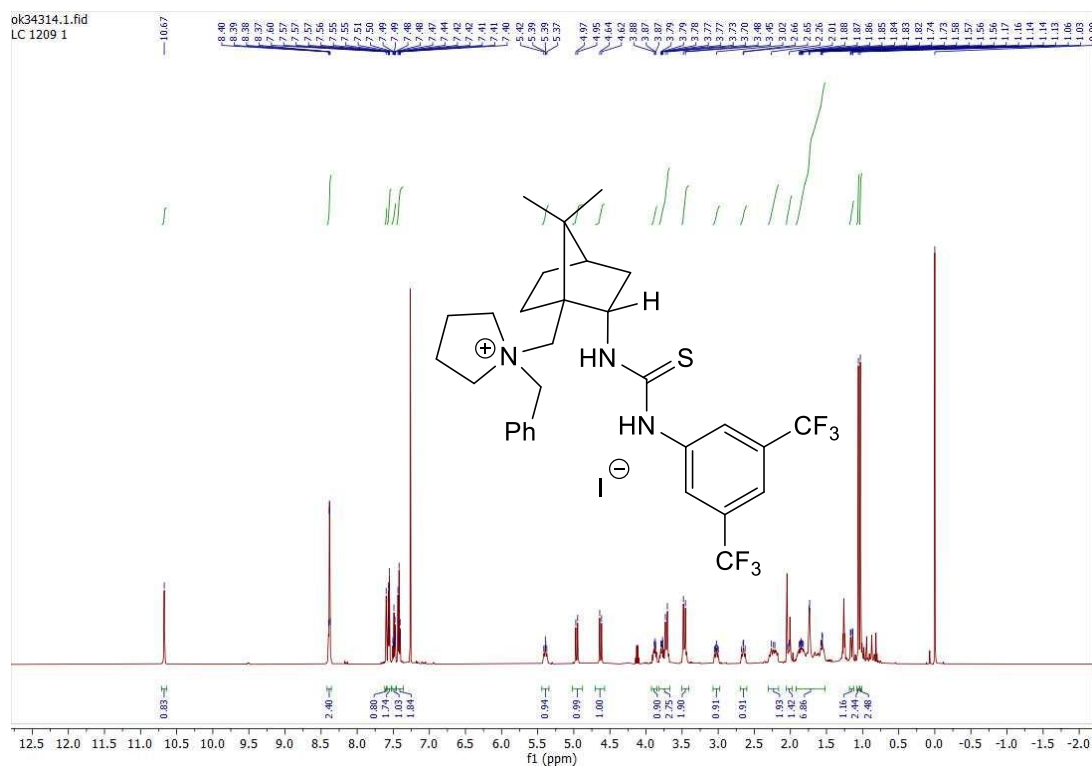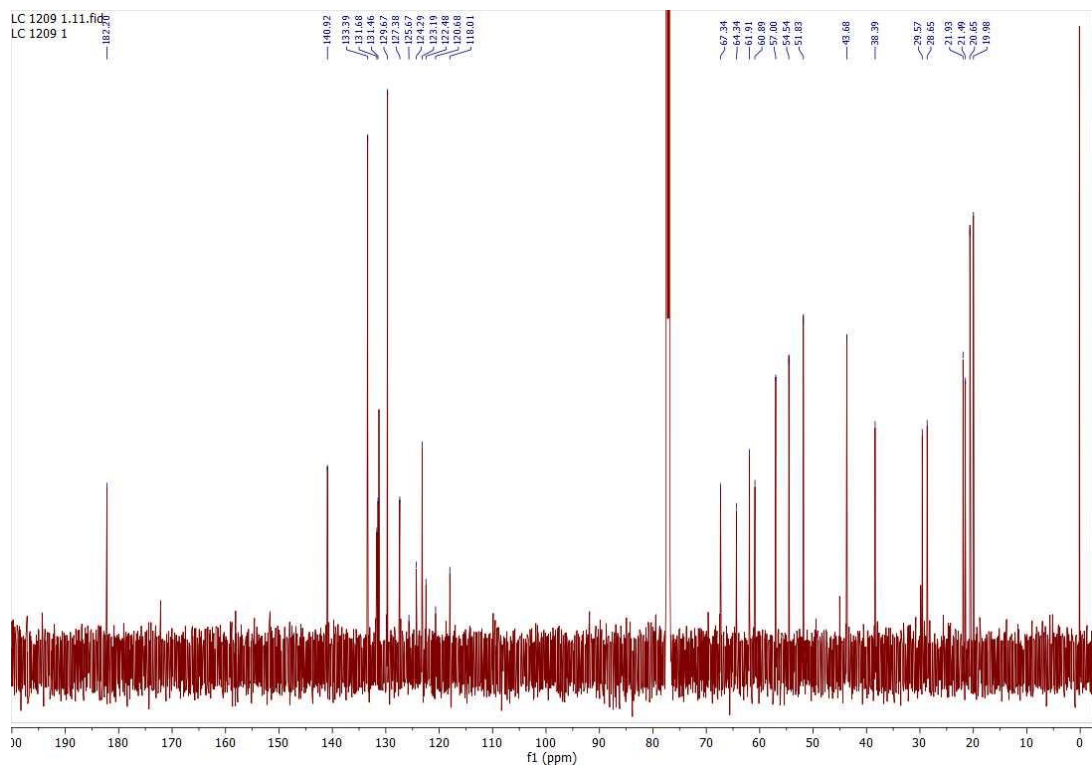

## NOESY

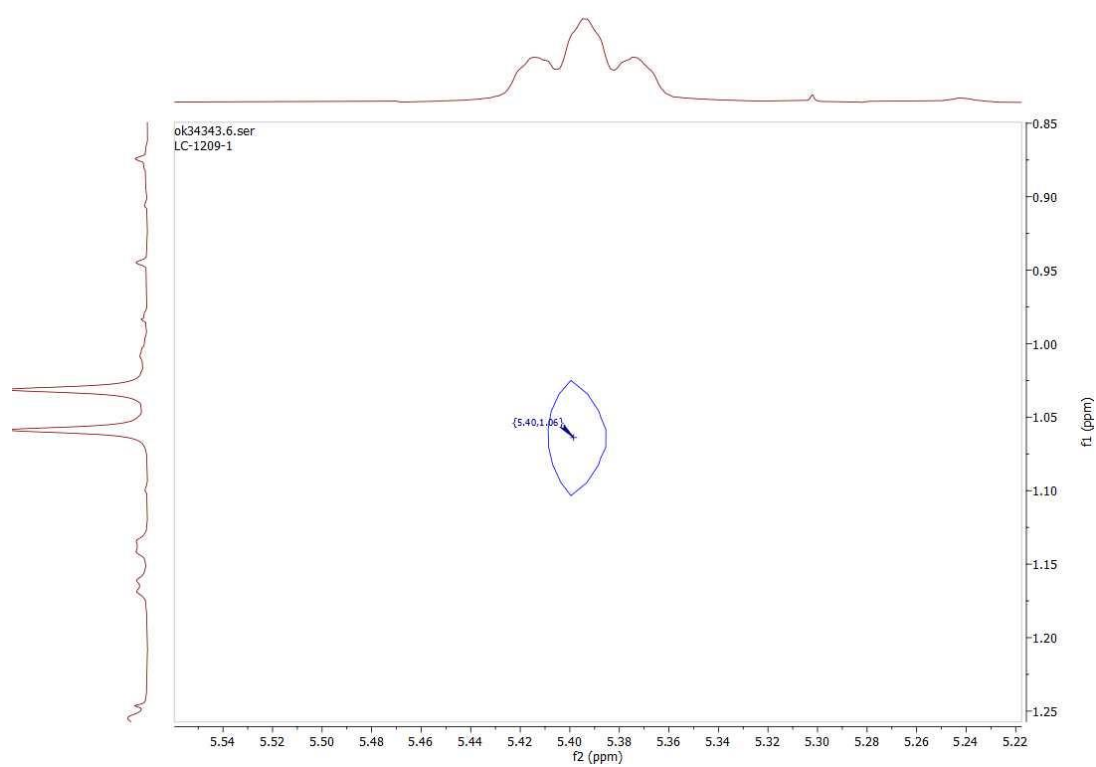

## $^{19}\text{F}$ -NMR

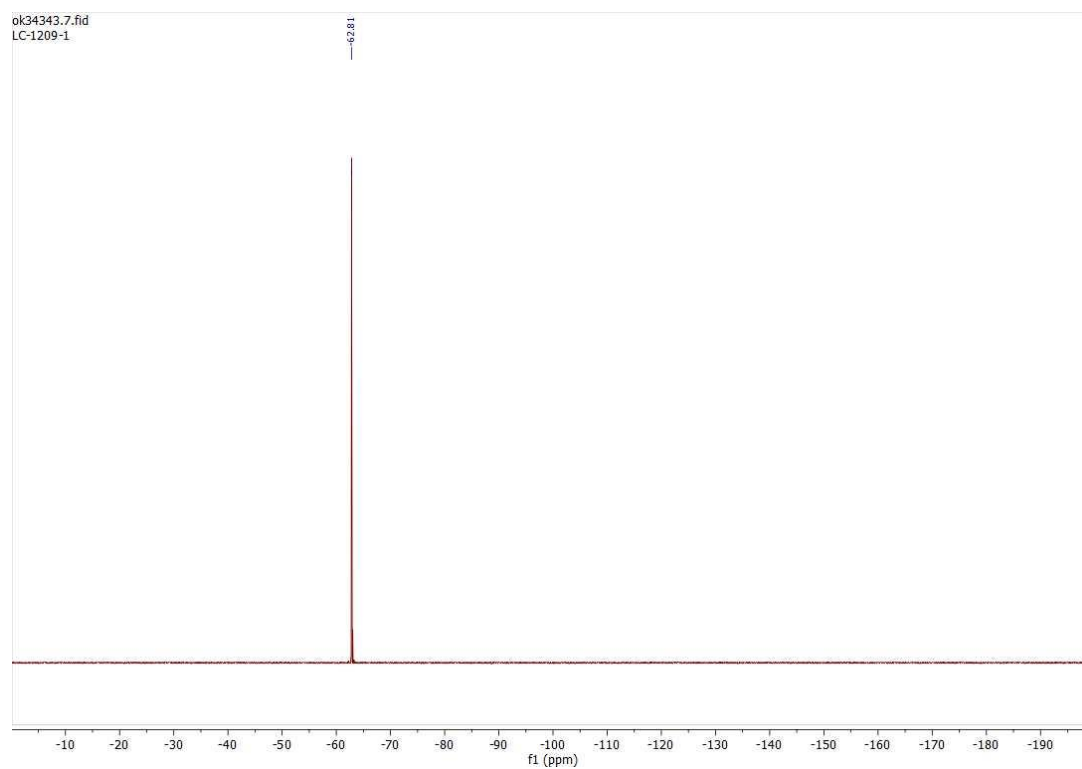

***N*-Benzyl-1-((1*R*,2*S*,4*R*)-2-(3-(3,5-bis(trifluoromethyl)phenyl)thioureido)-7,7-dimethylbicyclo[2.2.1]heptan-1-yl)-*N,N*-dimethylmethanaminium 2,2,2-trifluoroacetate (IV)**

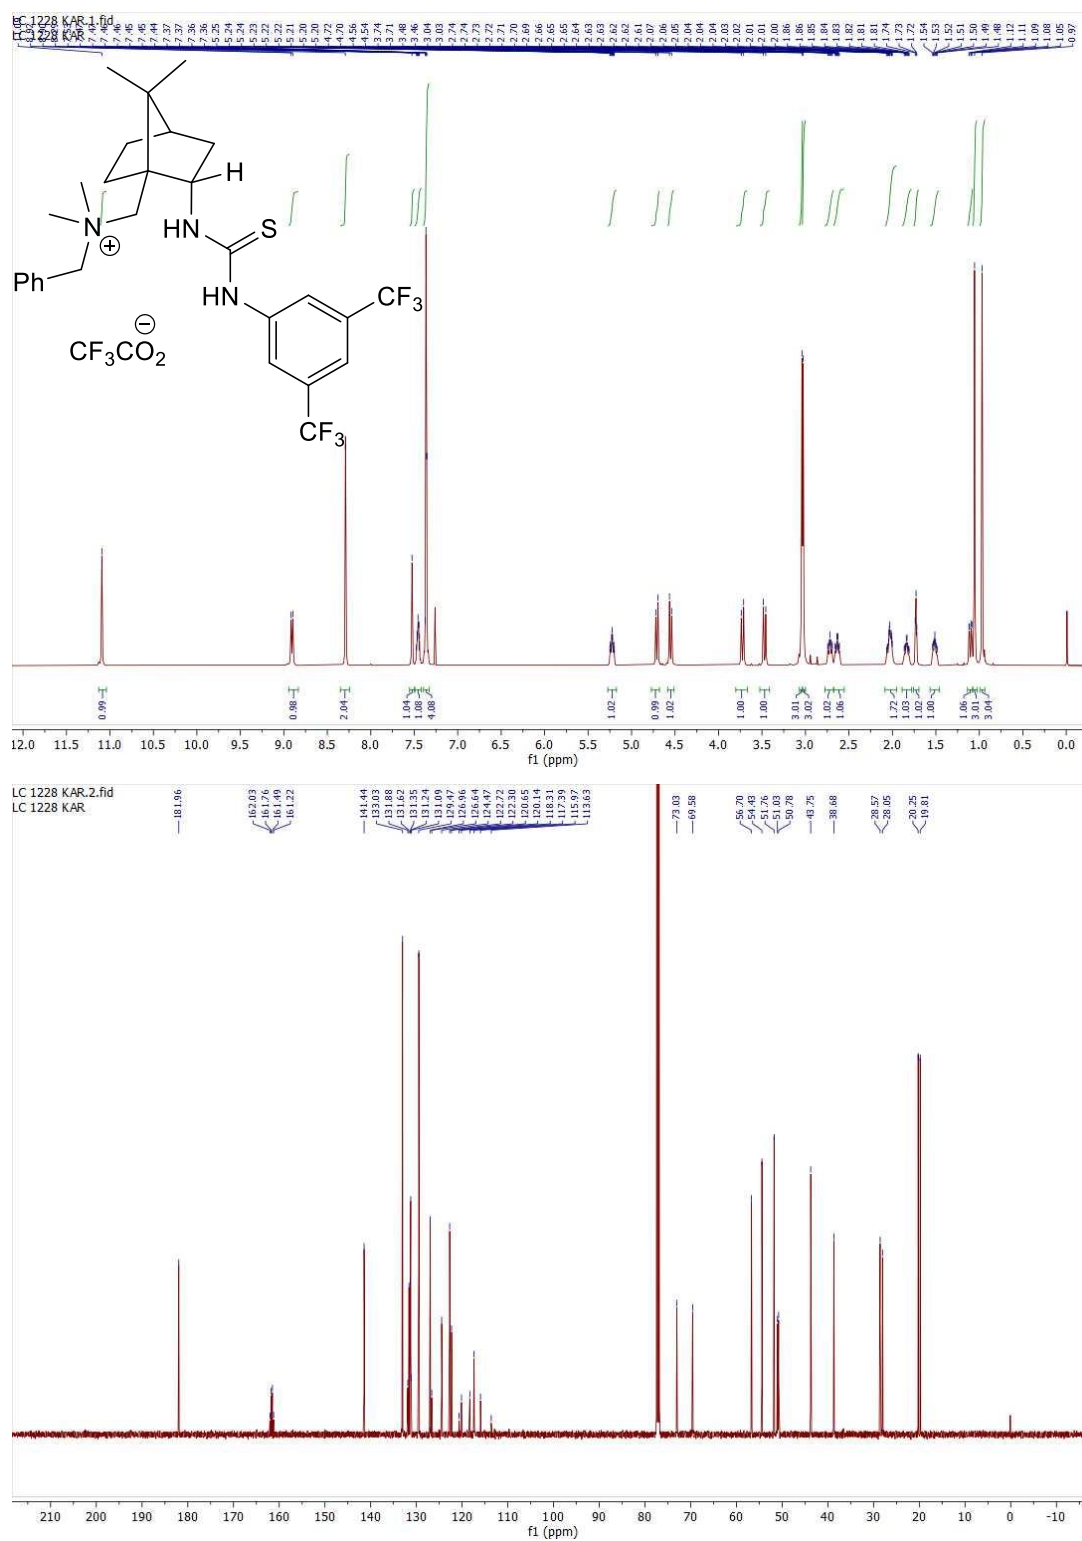

## NOESY

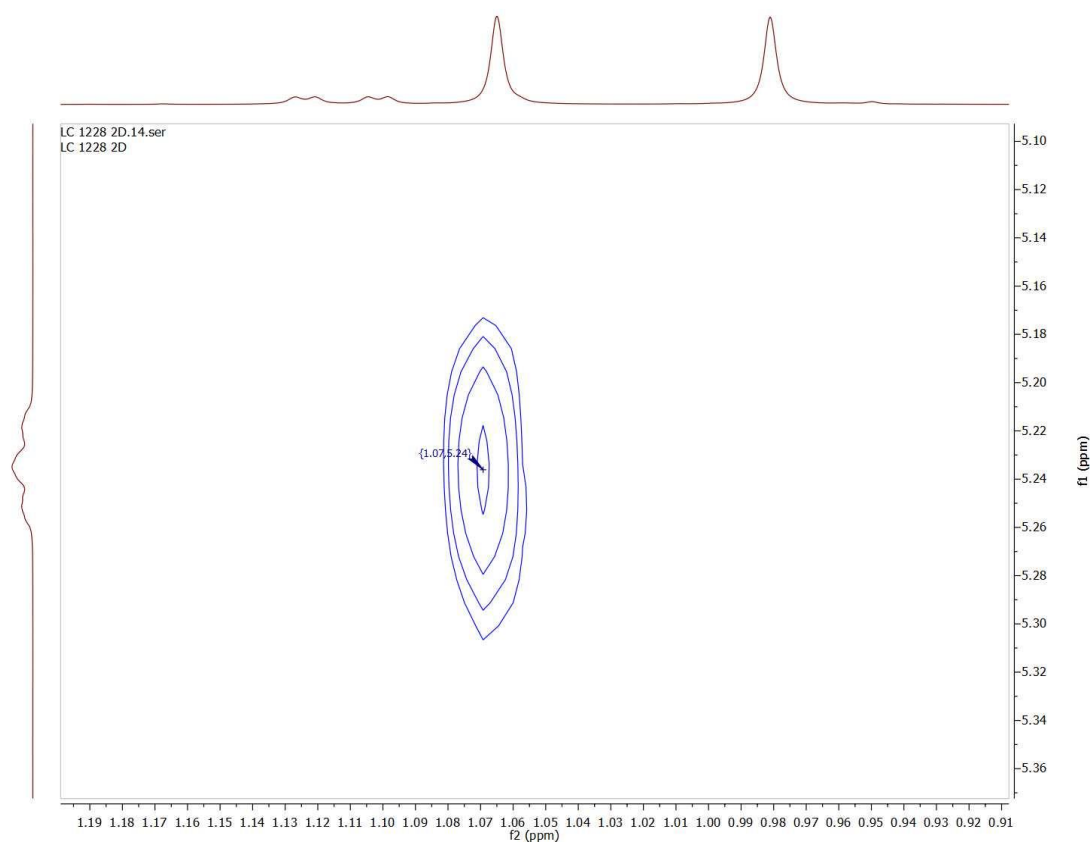

## $^{19}\text{F}$ -NMR

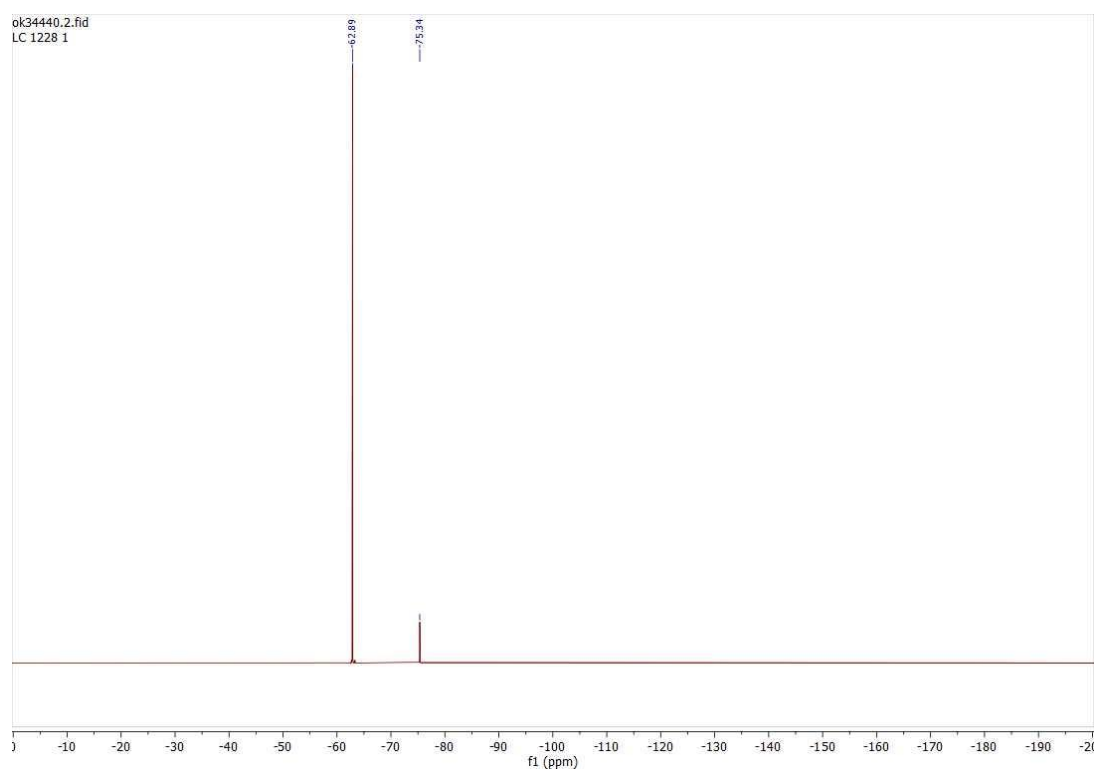

***N*-Benzyl-1-((1*R*,2*S*,4*R*)-2-(3-(3,5-bis(trifluoromethyl)phenyl)thioureido)-7,7-dimethylbicyclo[2.2.1]heptan-1-yl)-*N,N*-dimethylmethanaminium iodide (V)**

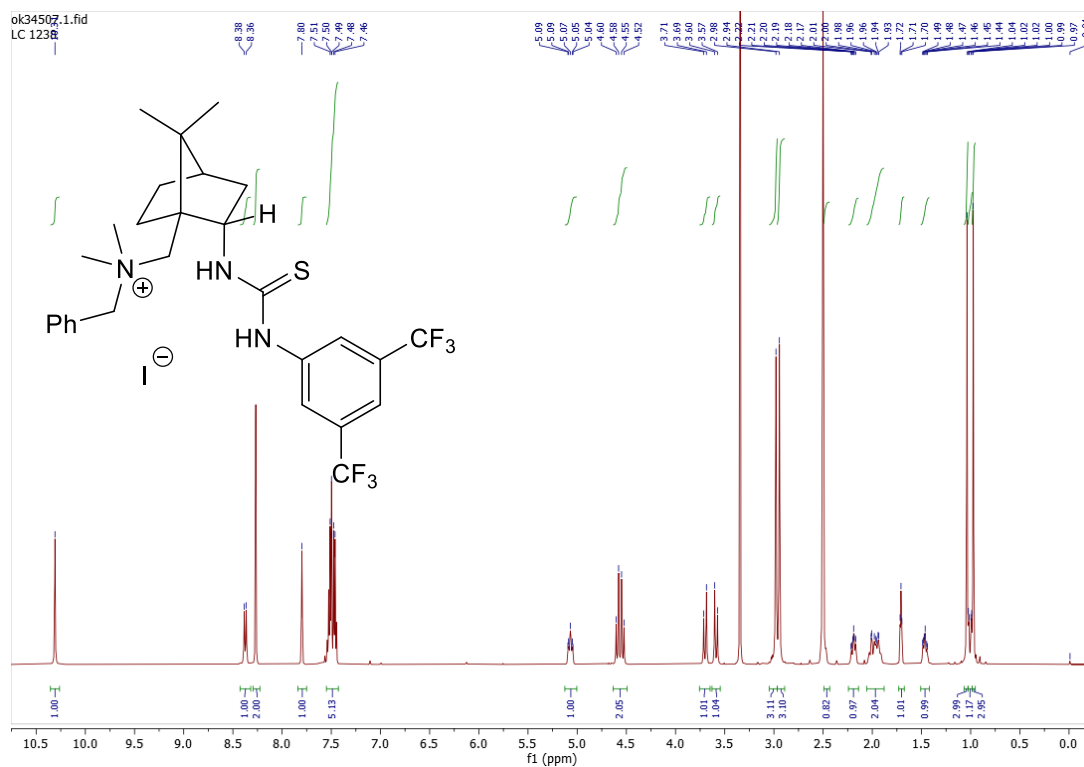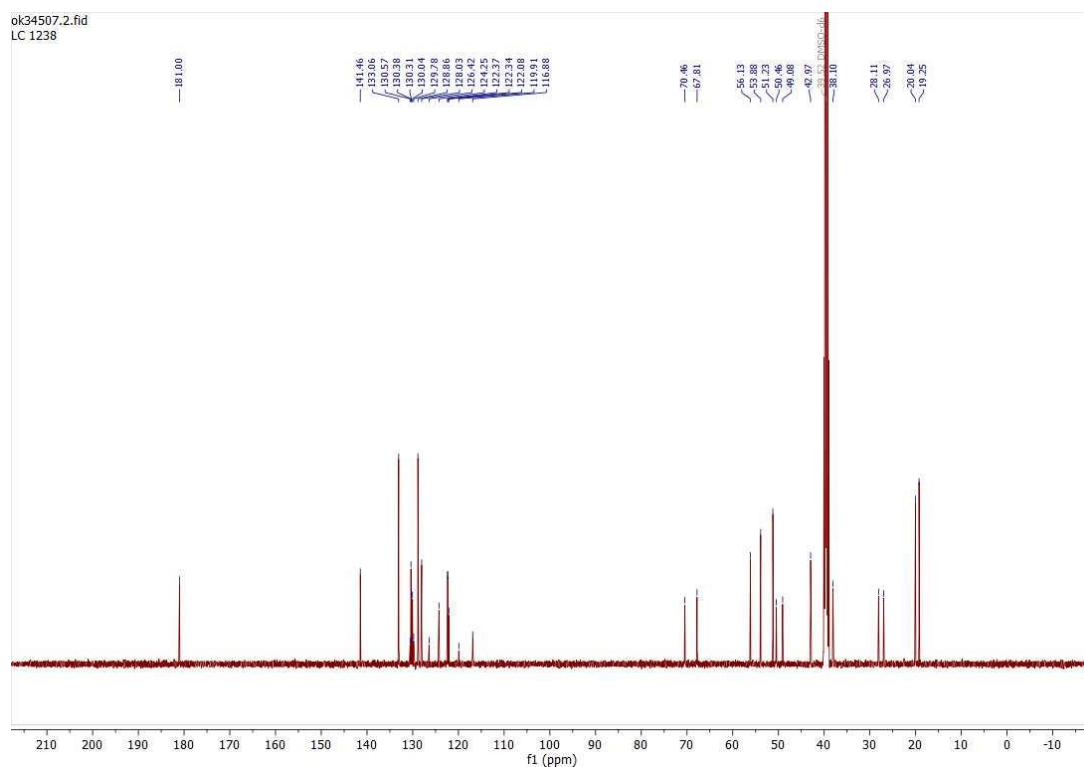



## NOESY

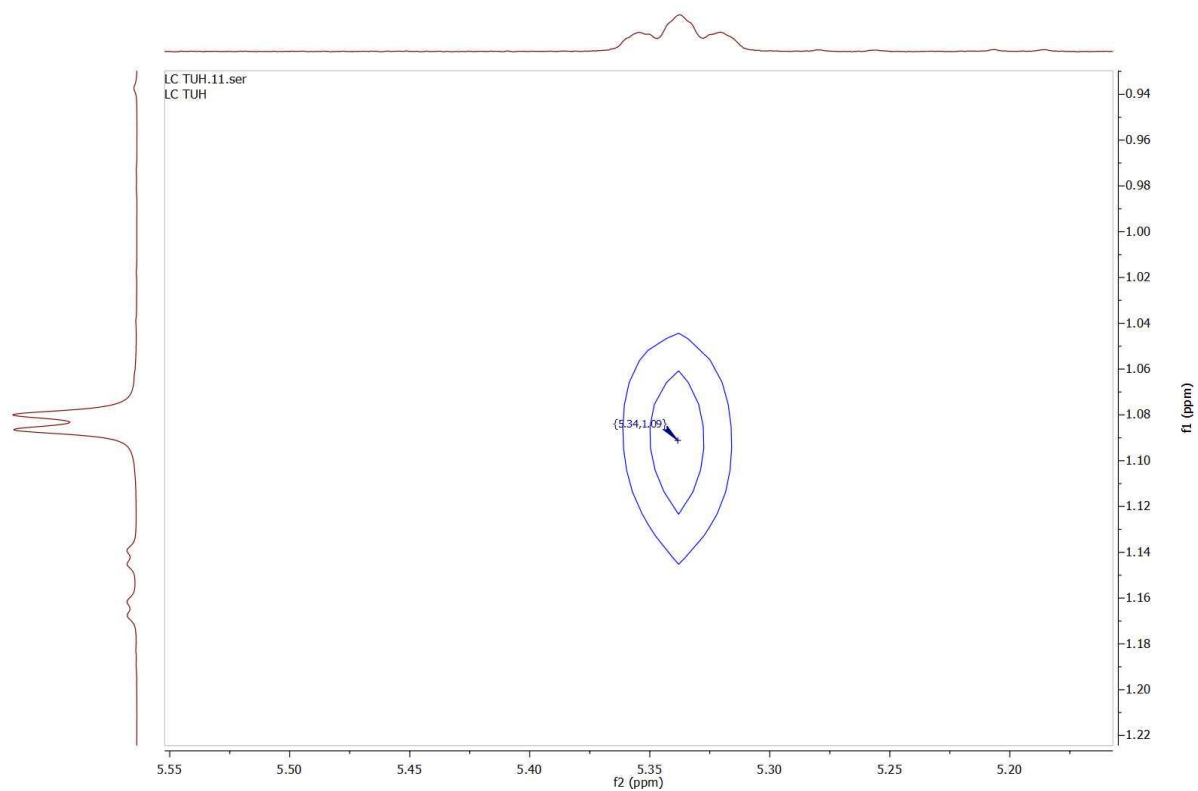

## <sup>19</sup>F-NMR

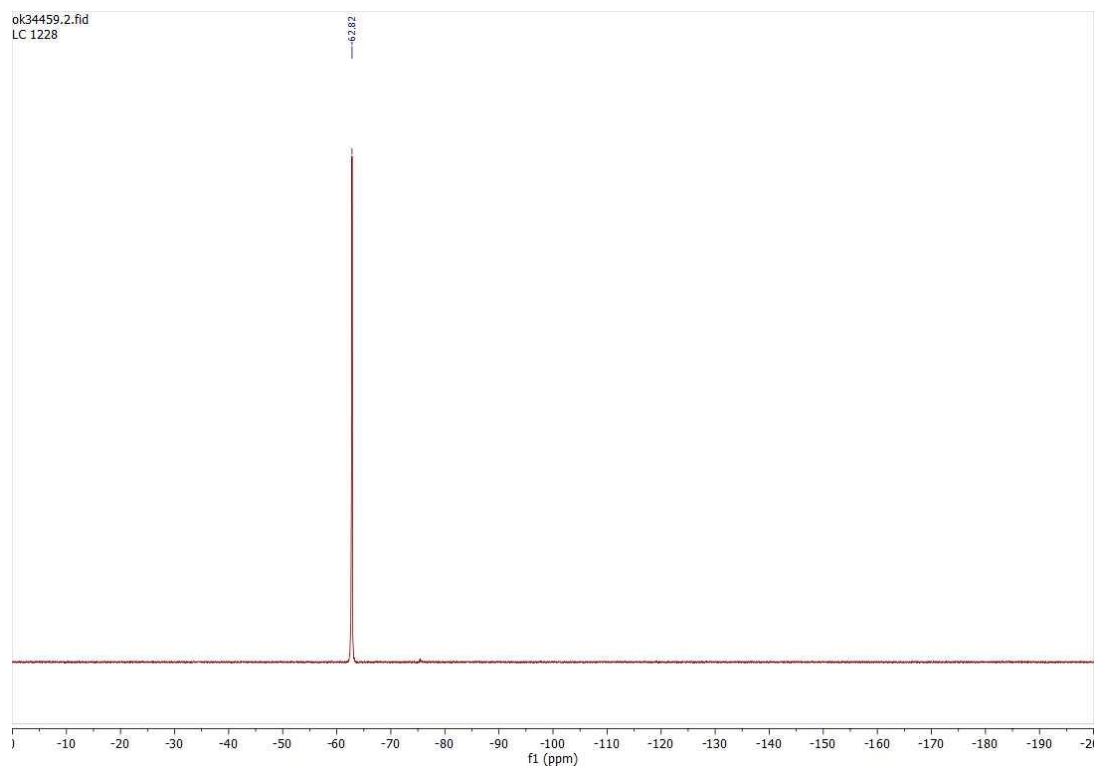

***N*-Benzyl-1-((1*R*,2*S*,4*R*)-7,7-dimethyl-2-(3-phenylthioureido)bicyclo[2.2.1]heptan-1-yl)-*N,N*-dimethylmethanaminium 2,2,2-trifluoroacetate (VI)**

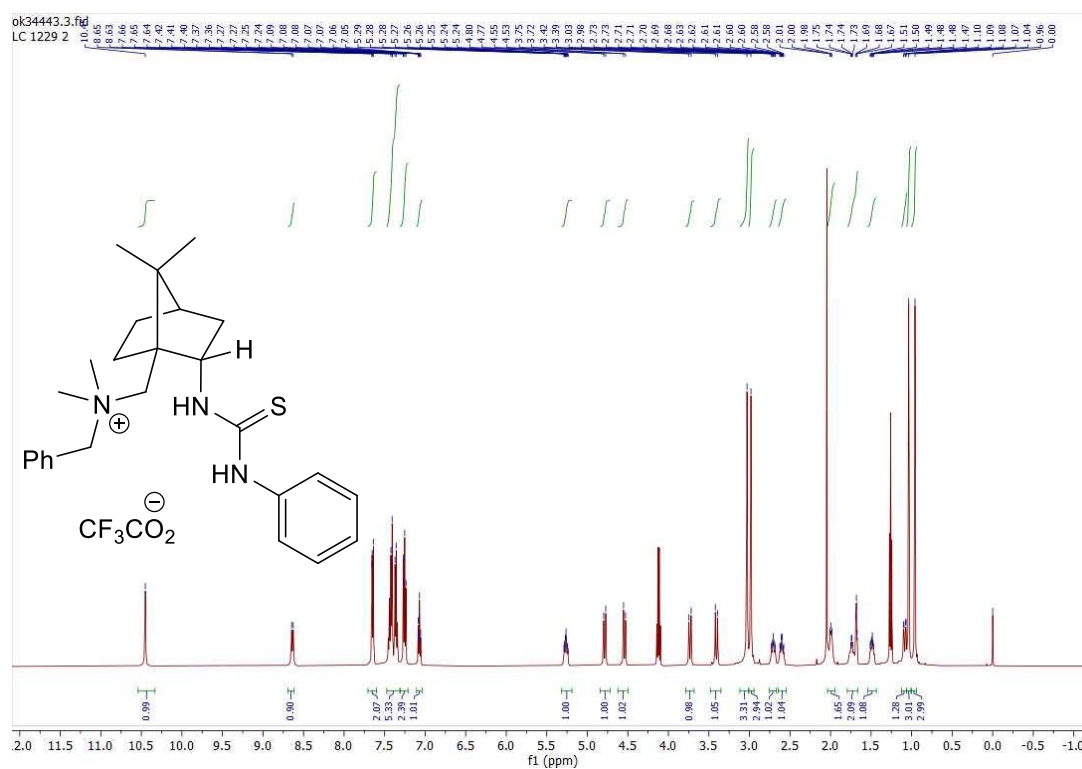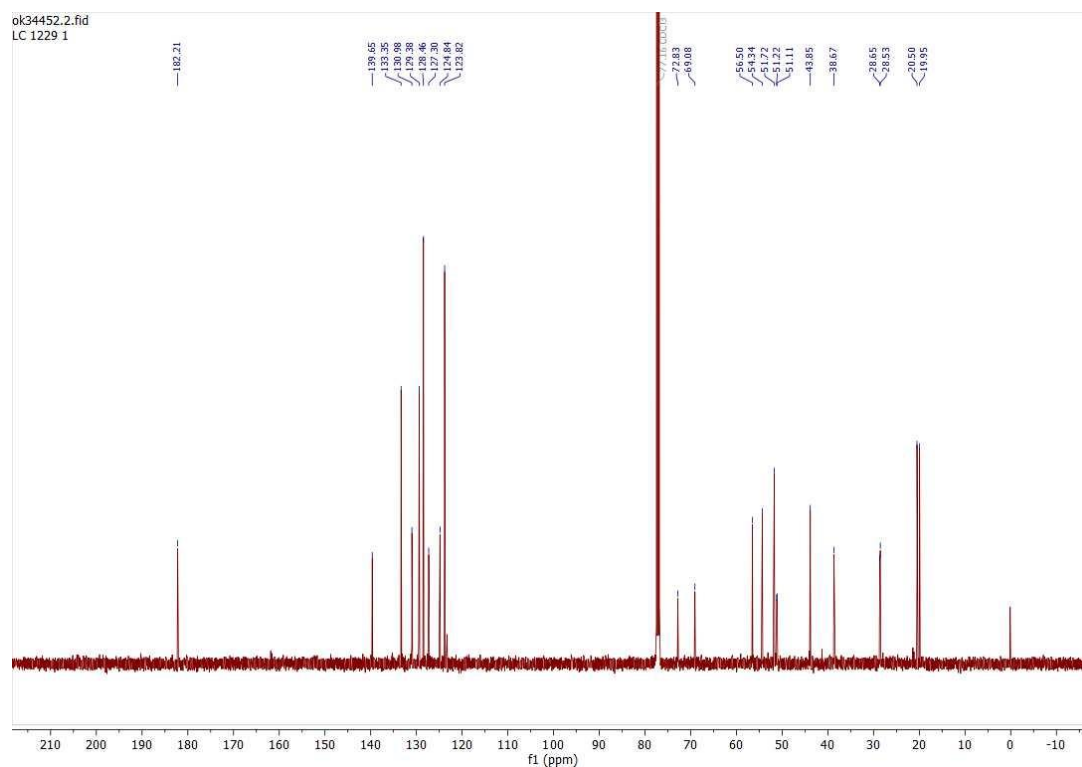

## NOESY

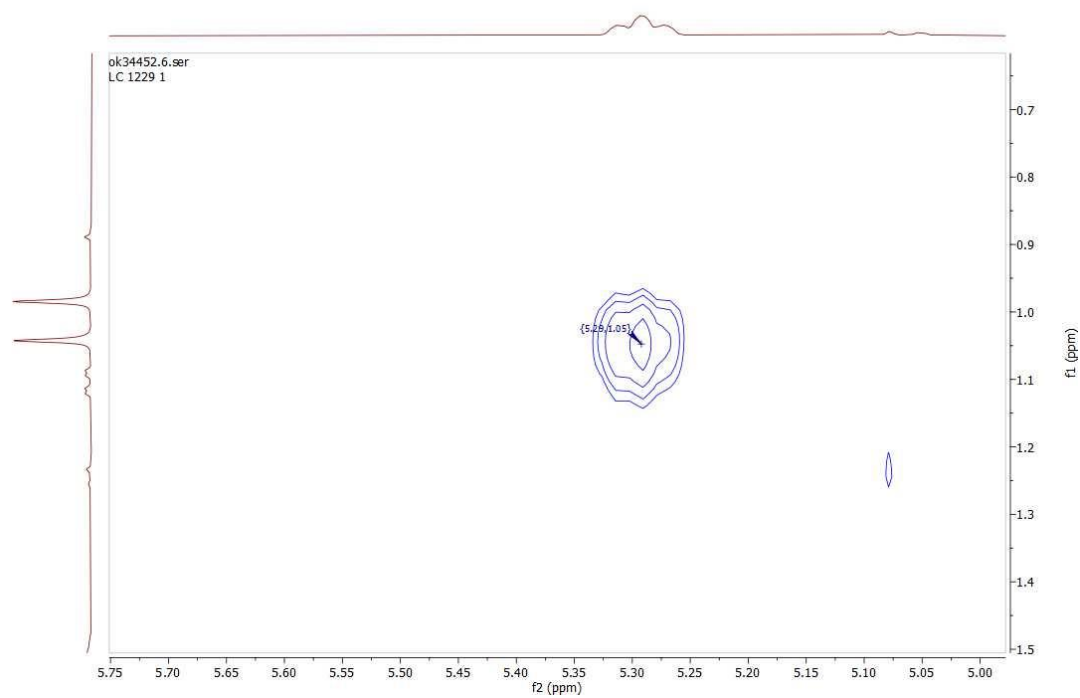

## $^{19}\text{F}$ -NMR

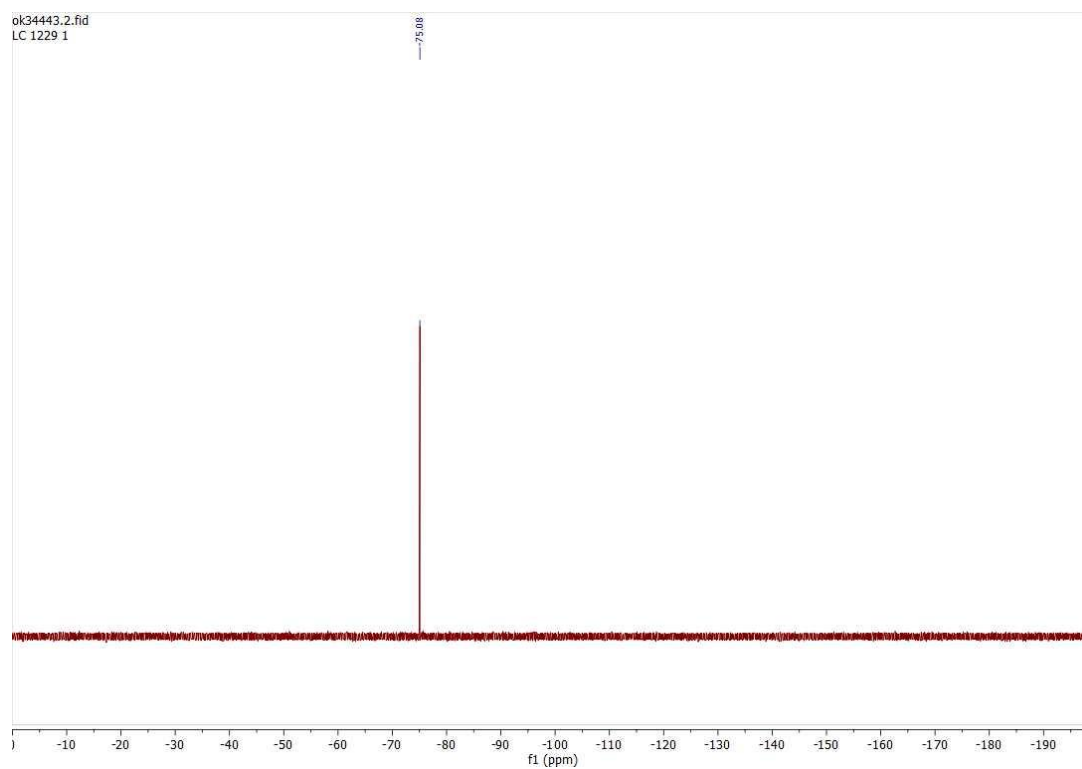

***N*-Benzyl-1-((1*R*,2*S*,4*R*)-7,7-dimethyl-2-(3-phenylureido)bicyclo[2.2.1]heptan-1-yl)-*N,N*-dimethylmethanaminium 2,2,2-trifluoroacetate (VII)**

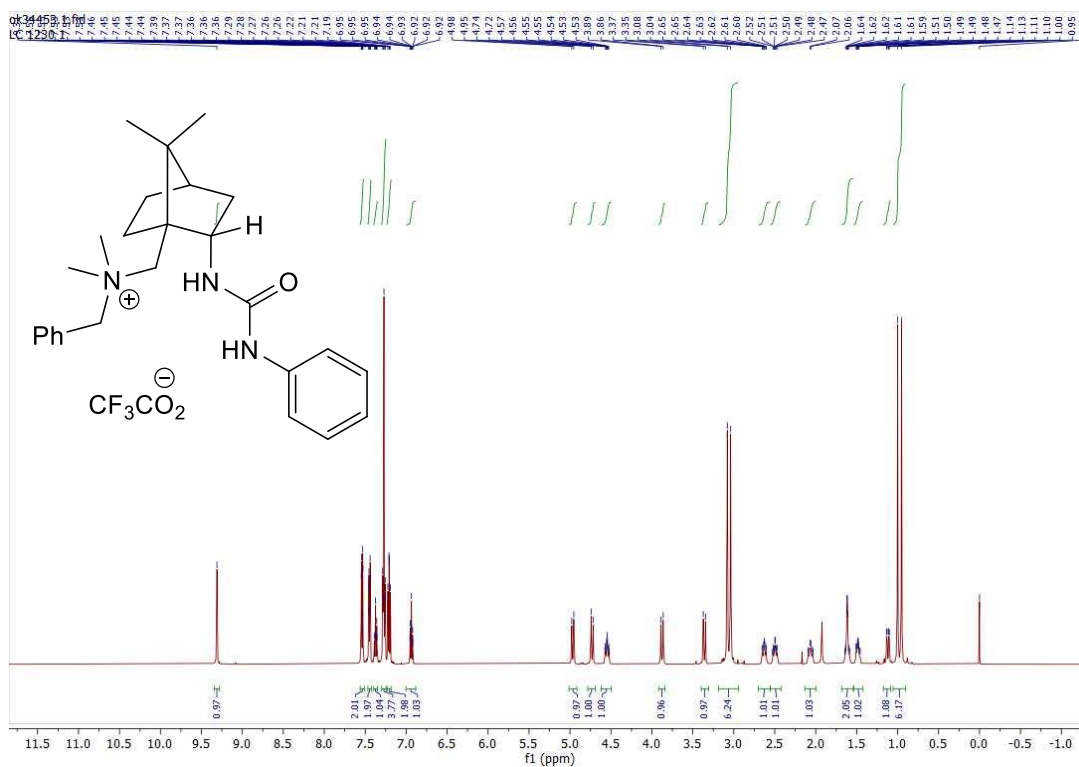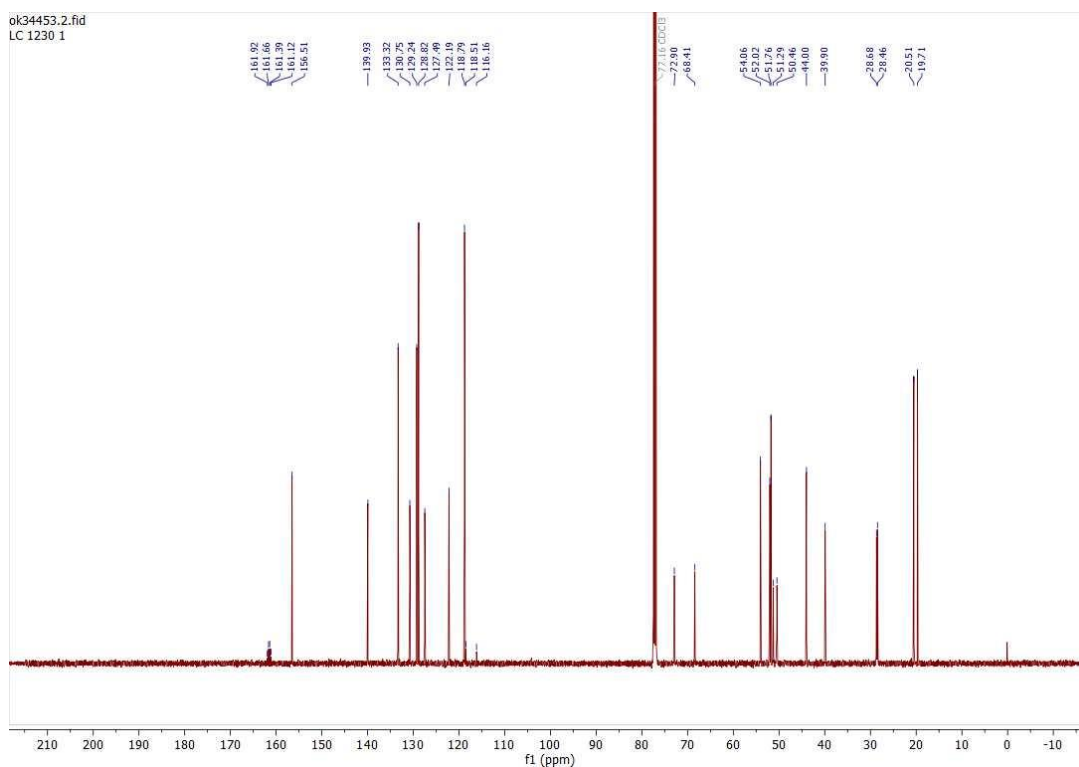

## NOESY

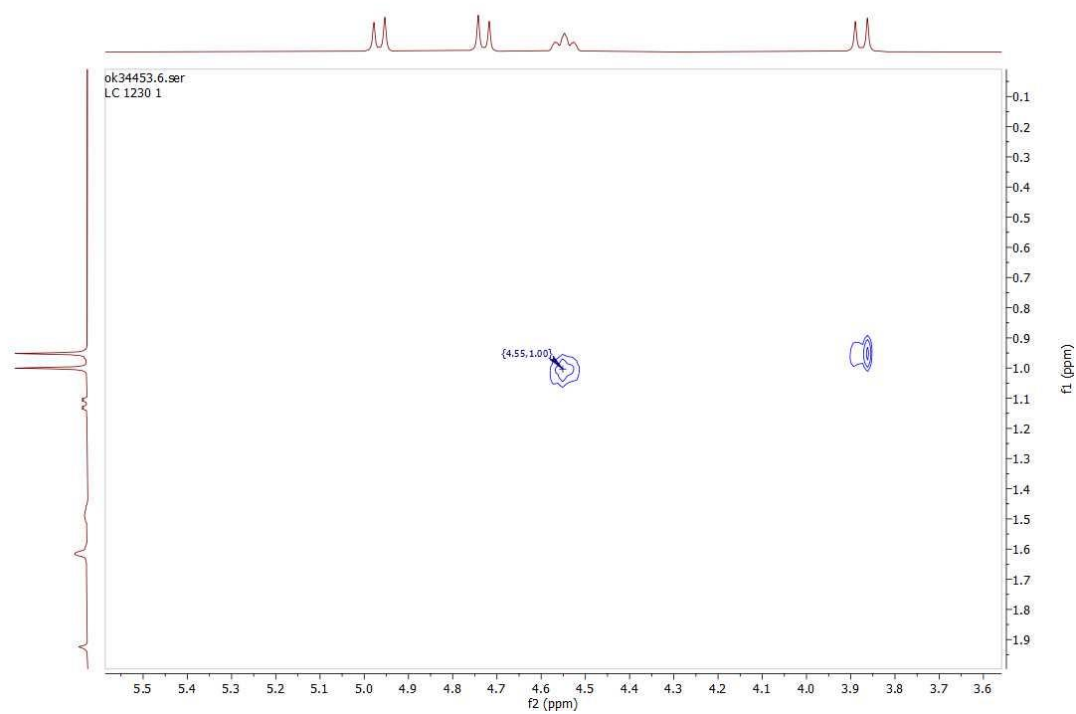

## <sup>19</sup>F-NMR

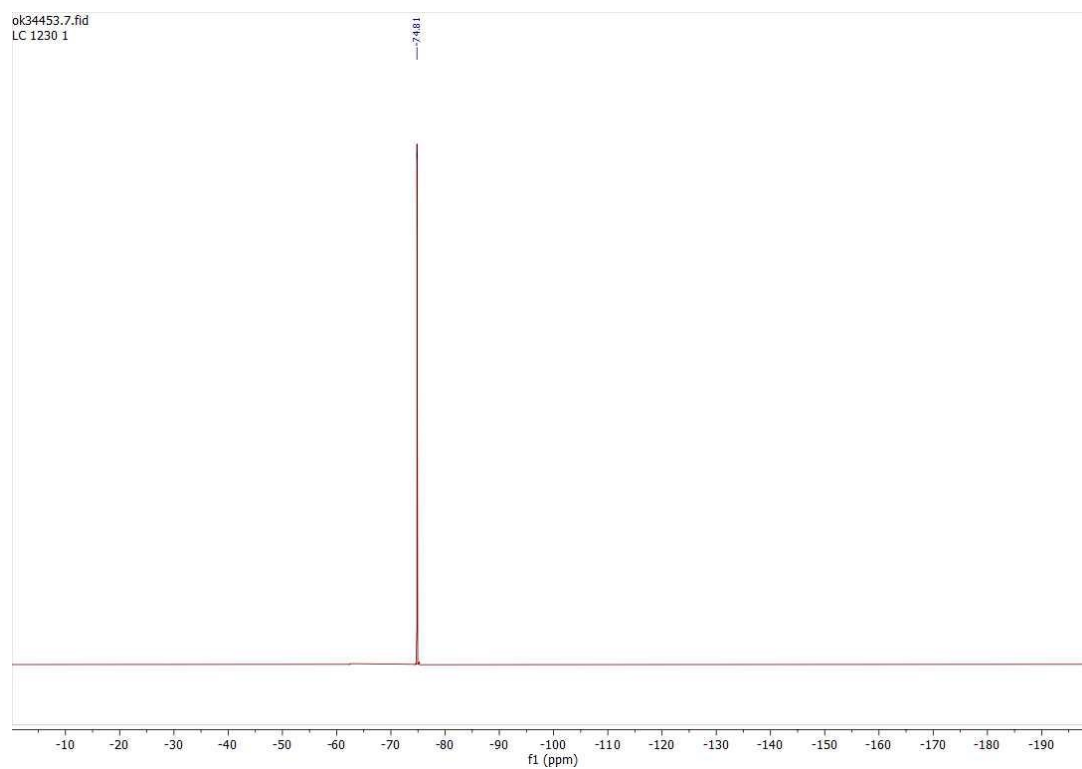

0K34413.1.fid  
LC 1219

Chemical structure of the compound is shown as an inset:

CN(C)(Cc1ccccc1)[C+]23CC4C(C(C)(C)C4)CC2C(=O)NC(=O)Nc5ccccc5.[I-]

<sup>1</sup>H NMR spectrum (ppm) with chemical shift values (δ) and integration values:

| Chemical Shift (ppm) | Integration |
|----------------------|-------------|
| 9.10                 | 1.01        |
| 7.42                 | 2.11        |
| 7.38                 | 2.08        |
| 7.33                 | 2.03        |
| 7.22                 | 2.03        |
| 7.21                 | 2.03        |
| 7.14                 | 1.95        |
| 7.09                 | 1.95        |
| 7.06                 | 1.95        |
| 7.03                 | 1.95        |
| 6.96                 | 1.95        |
| 6.93                 | 1.95        |
| 6.86                 | 0.99        |
| 6.83                 | 0.99        |
| 6.74                 | 0.99        |
| 5.00                 | 0.99        |
| 4.79                 | 0.99        |
| 4.62                 | 1.00        |
| 4.41                 | 1.00        |
| 4.11                 | 1.11        |
| 3.96                 | 1.11        |
| 3.80                 | 1.11        |
| 3.63                 | 1.11        |
| 3.36                 | 1.00        |
| 3.11                 | 6.15        |
| 2.74                 | 1.00        |
| 2.70                 | 1.00        |
| 2.54                 | 1.00        |
| 2.53                 | 1.00        |
| 2.52                 | 0.88        |
| 2.51                 | 1.94        |
| 2.50                 | 1.94        |
| 2.49                 | 1.94        |
| 2.26                 | 6.27        |
| 1.63                 | 1.11        |
| 1.62                 | 1.11        |
| 1.56                 | 1.11        |
| 1.55                 | 1.11        |
| 1.57                 | 1.11        |
| 1.52                 | 1.11        |
| 1.51                 | 1.11        |
| 1.50                 | 1.11        |
| 1.46                 | 1.11        |
| 1.35                 | 1.11        |
| 1.13                 | 1.11        |
| 1.12                 | 1.11        |
| 1.01                 | 1.11        |

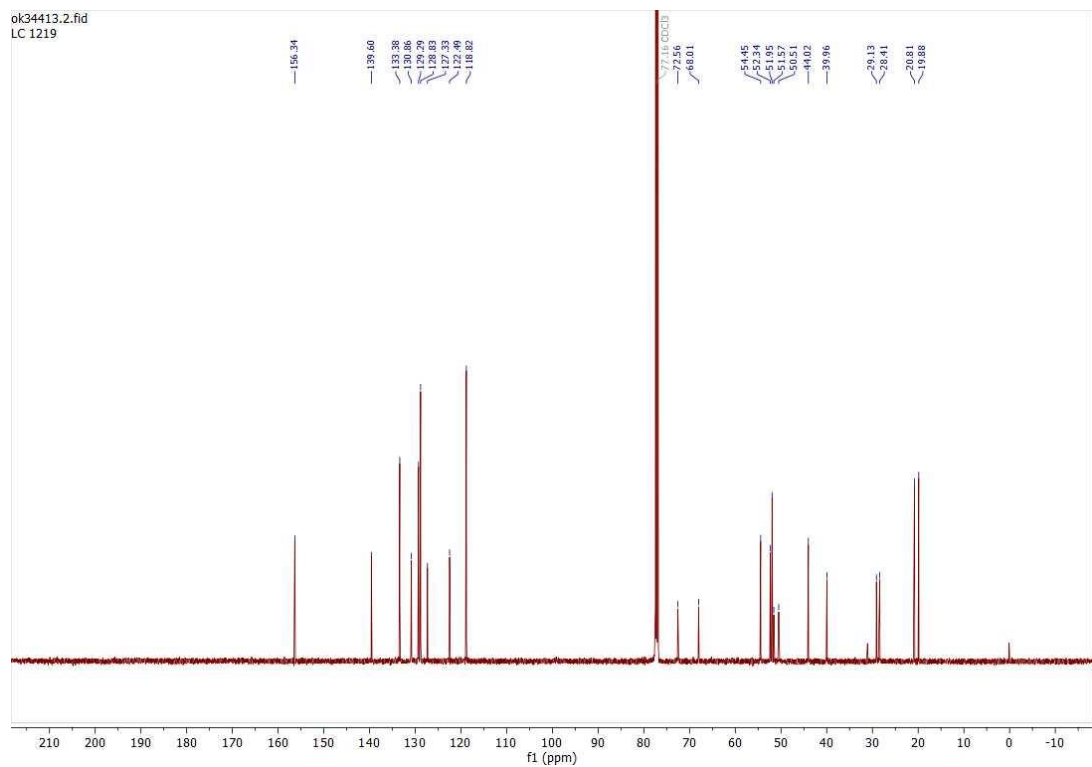

## NOESY

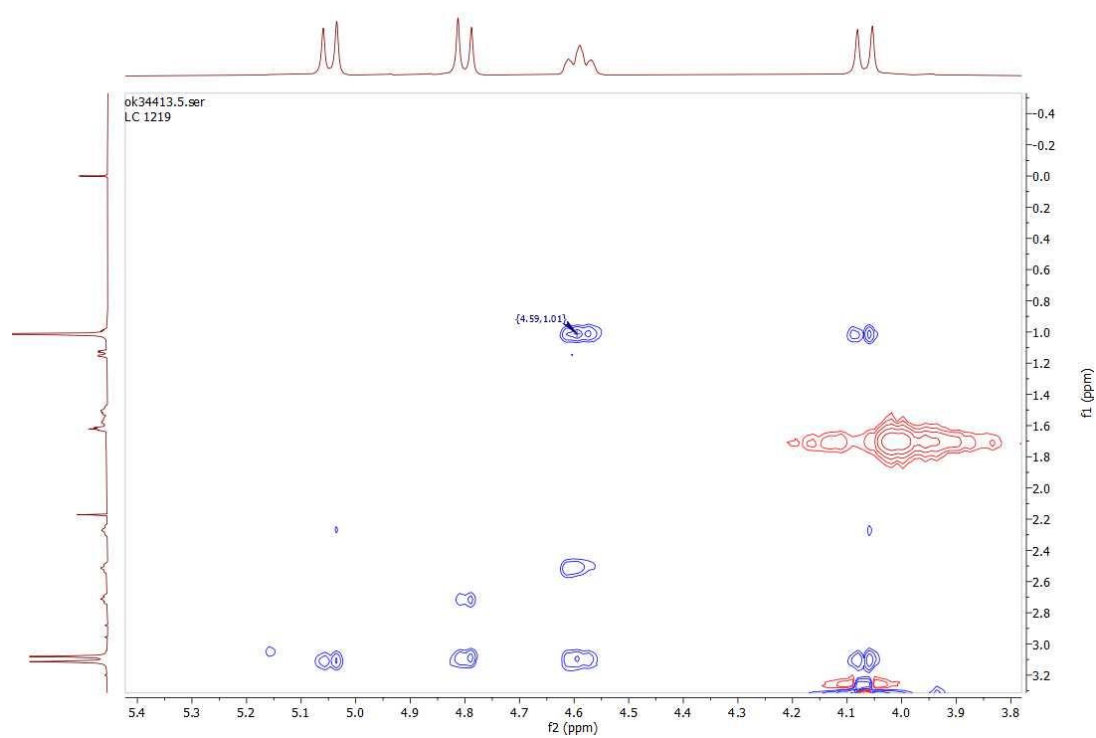

# NOESY

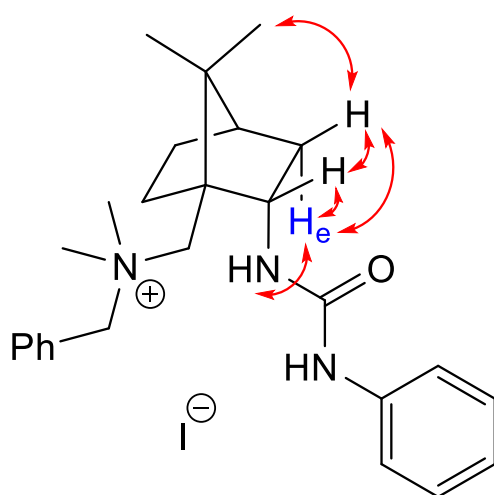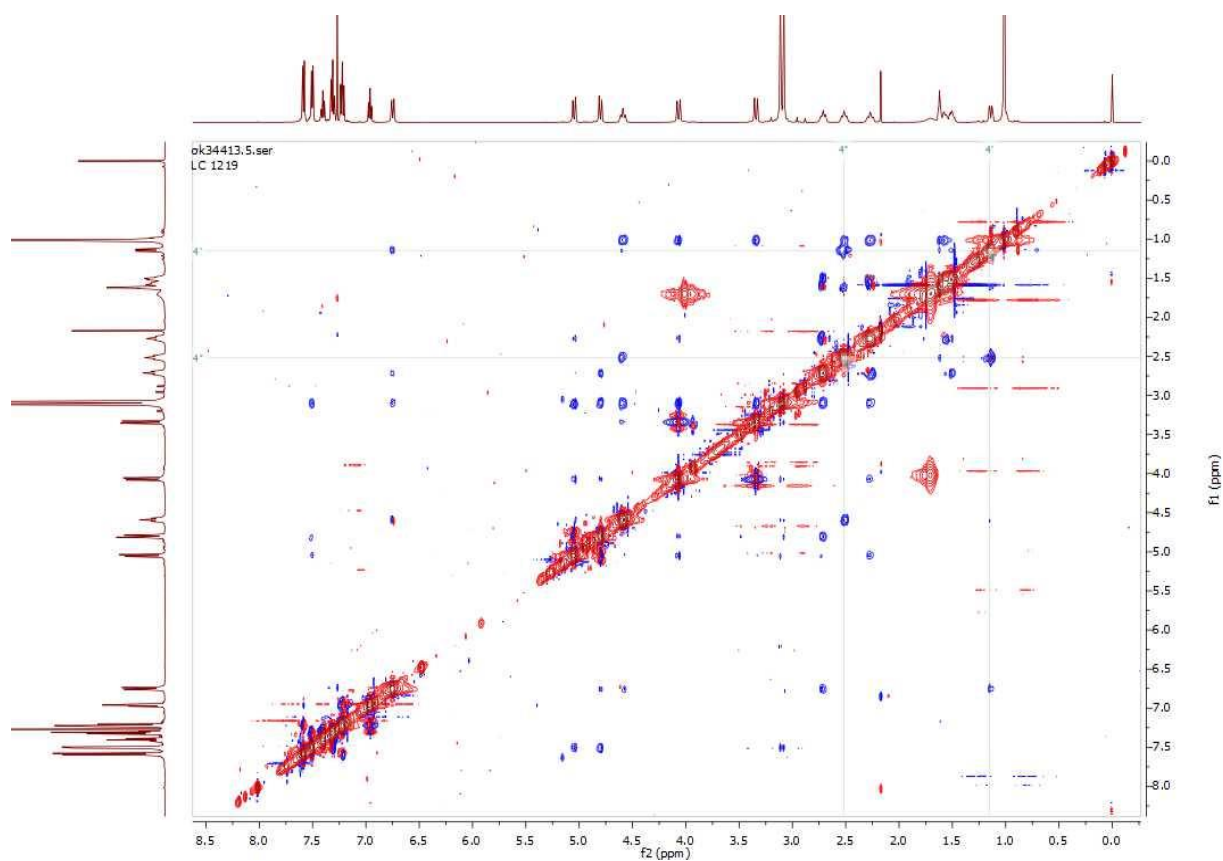



***N*-Benzyl-1-((1*R*,2*S*,4*R*)-2-((2-((3,5-bis(trifluoromethyl)phenyl)amino)-3,4-dioxocyclobut-1-en-1-yl)amino)-7,7-dimethylbicyclo[2.2.1]heptan-1-yl)-*N,N*-dimethylmethanaminium 2,2,2-trifluoroacetate (IX)**

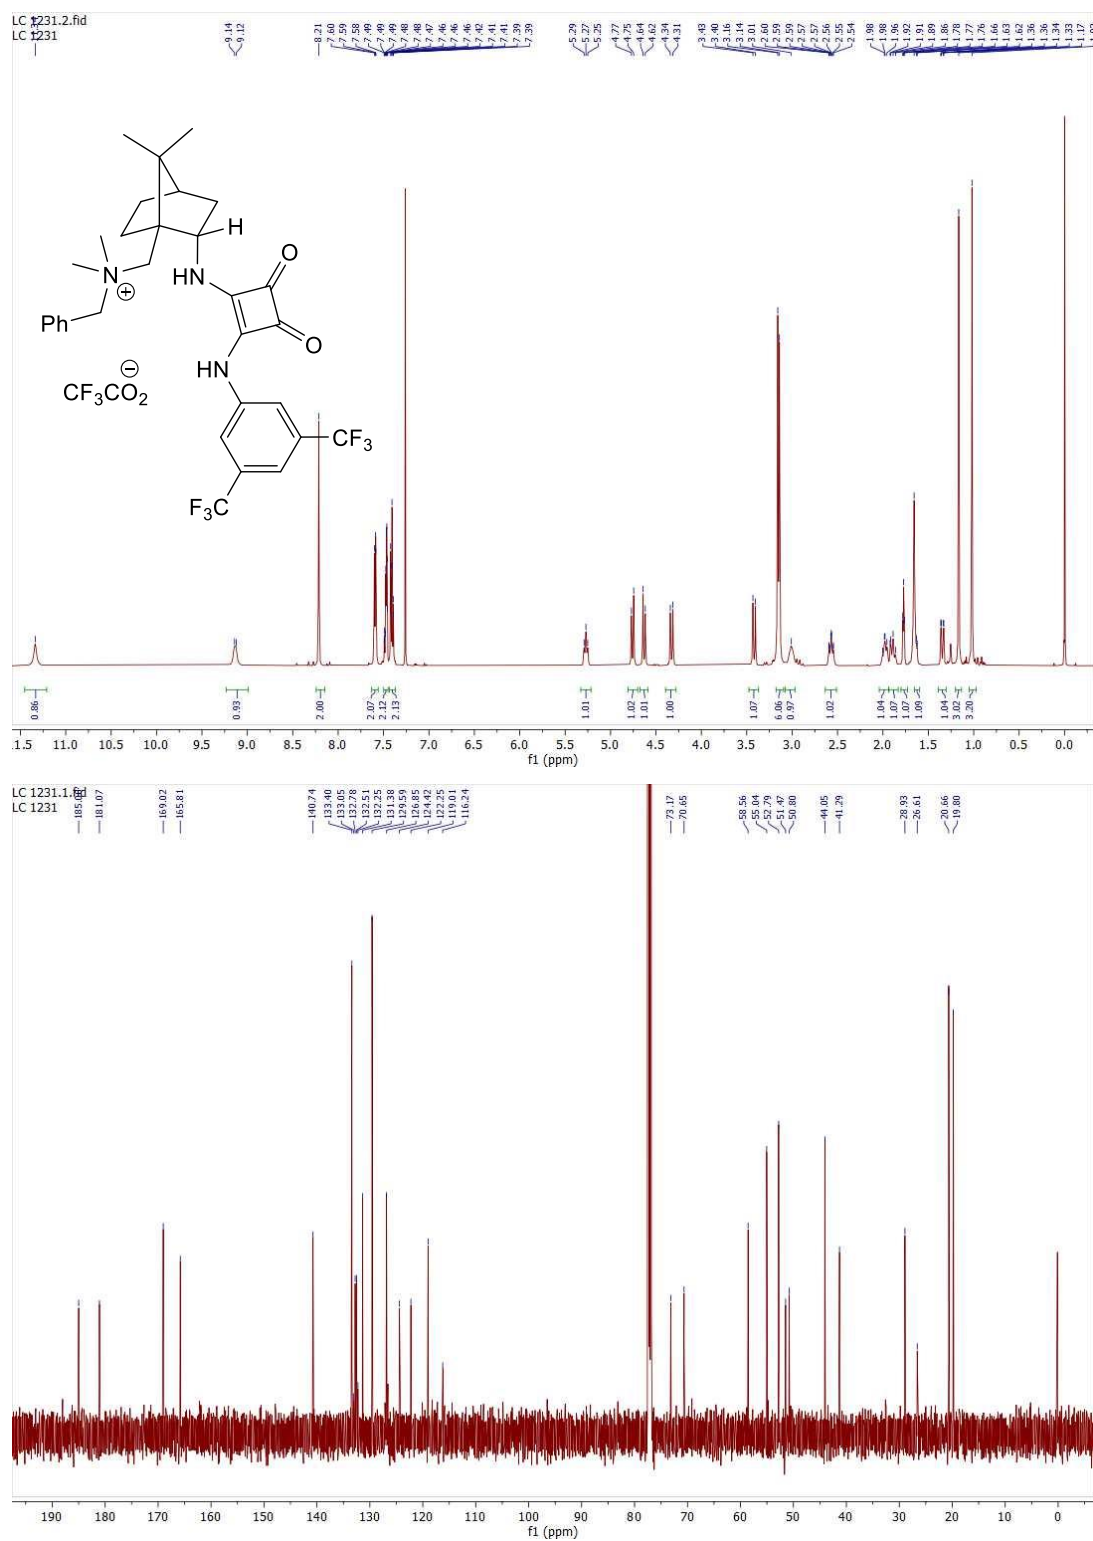

## NOESY

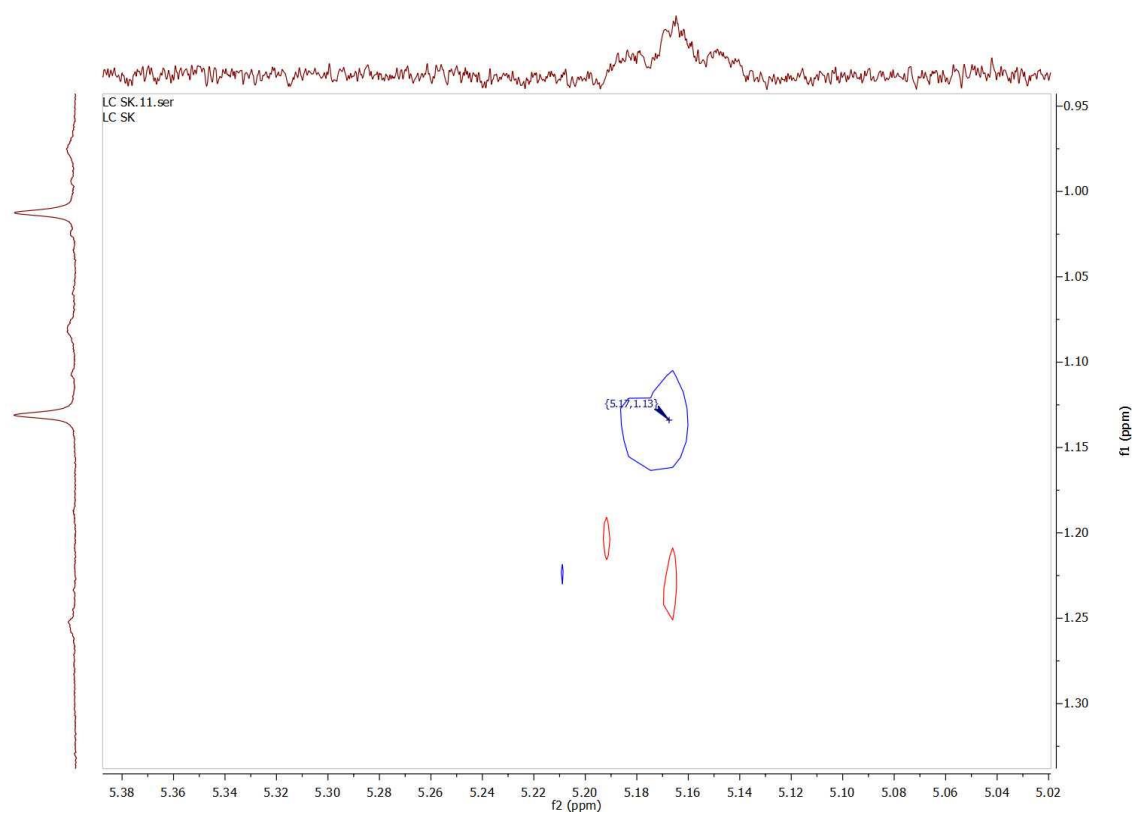

## $^{19}\text{F}$ -NMR

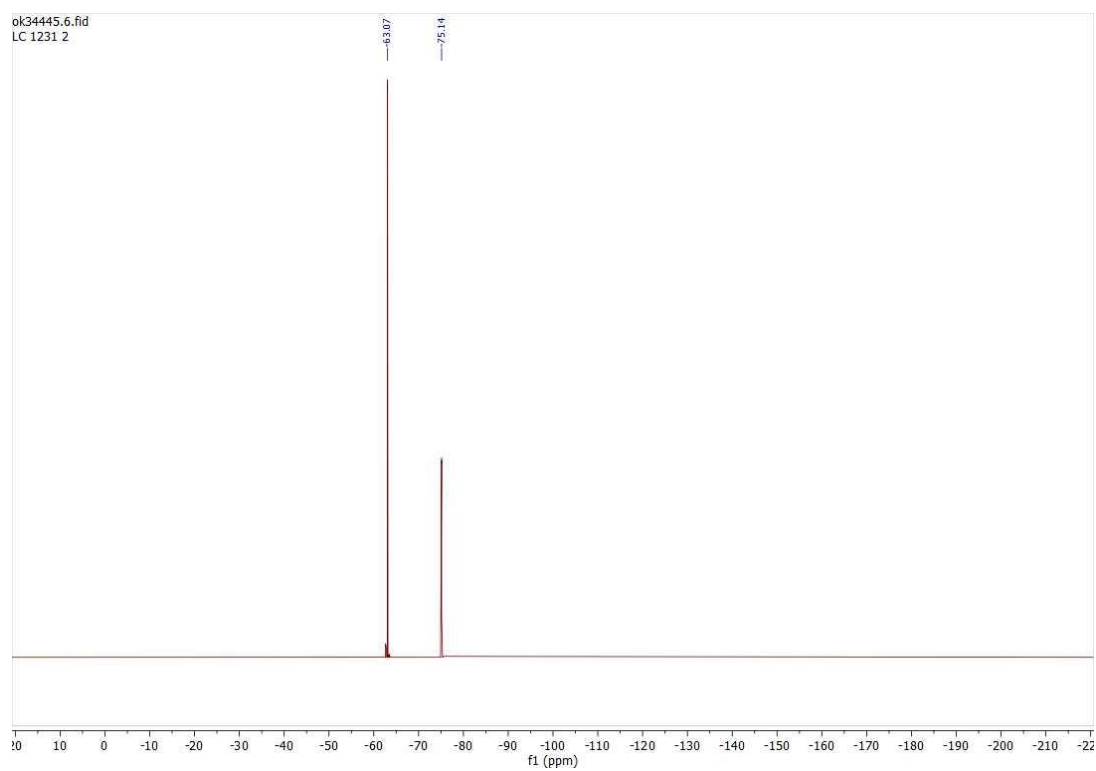

**1-benzyl-1-(((1*S*,2*S*,4*R*)-7,7-dimethyl-2-(3-phenylthioureido)bicyclo[2.2.1]heptan-1-yl)methyl)pyrrolidin-1-ium iodide (X)**

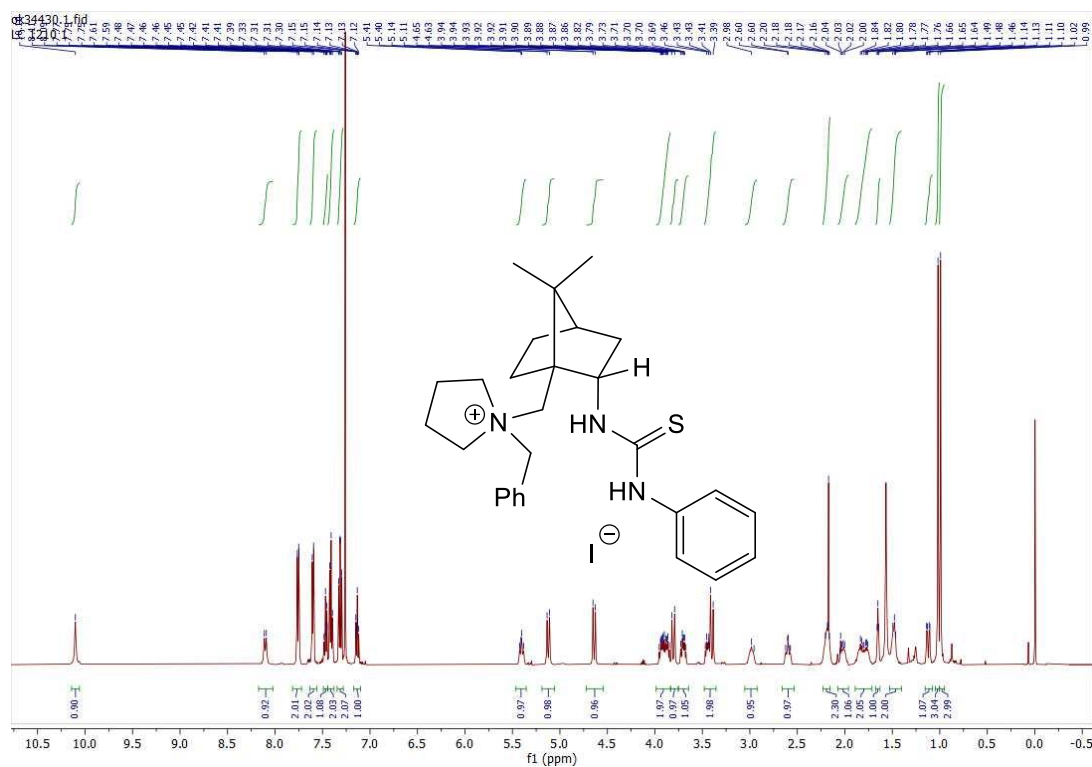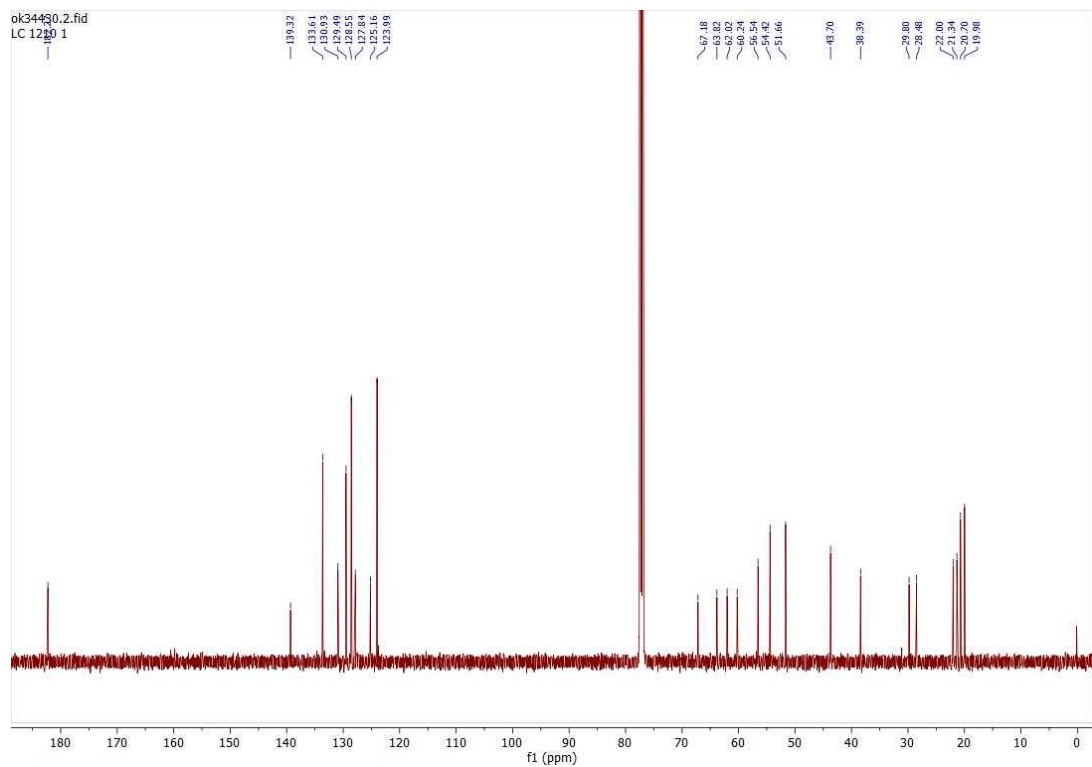

# NOESY

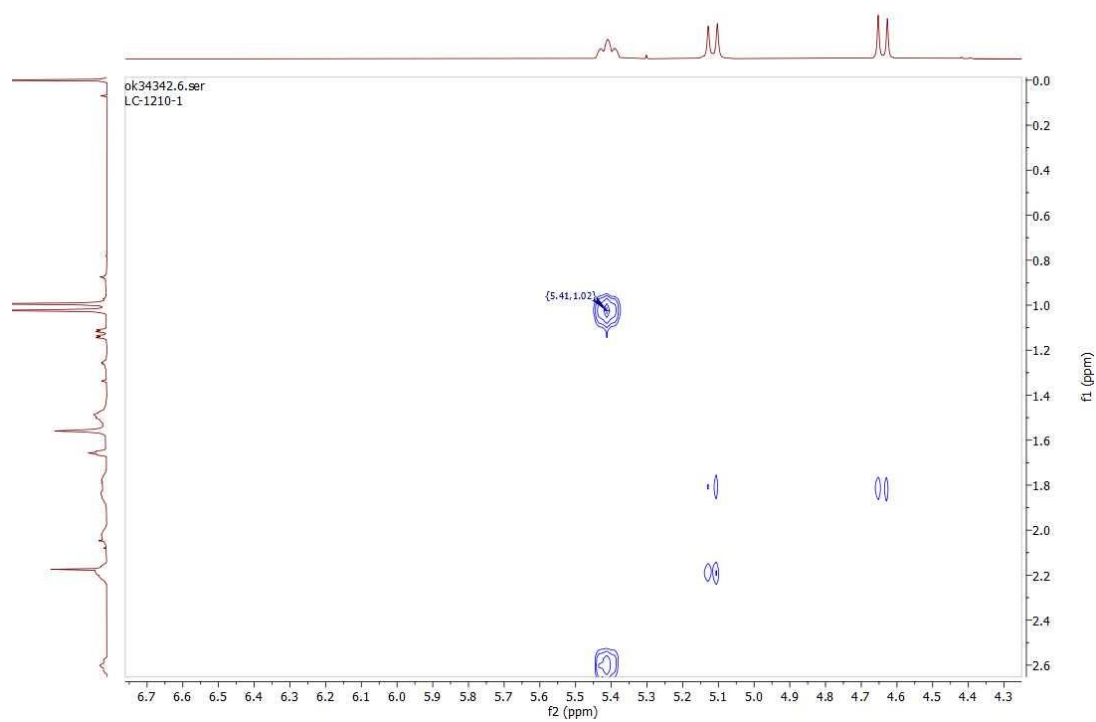

#### 4. Determination of the absolute configuration at the C-2 chiral center

**Table S7.** Correlation between the multiplicity of the H-C(3)-*endo* proton ( $H_e$ ) and the *endo* absolute configuration at the C-2 chiral center of compounds **1a**, **3b**, **5a**, **7a,b**, and **III–X**.<sup>[a]</sup>

| <div style="text-align: center;"> 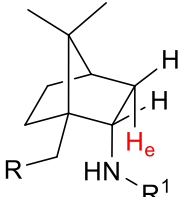 <p><math>H_e</math> appears as <i>dd</i><br/>between 0.67 and 1.35 ppm</p> <p><b>endo-isomers</b><br/><b>1a, 3b, 5a, 7a,b, and III–X</b></p> </div> |                      |                             |             |                      |                             |
|-------------------------------------------------------------------------------------------------------------------------------------------------------------------------------------------------------------------------------------------------------------------------|----------------------|-----------------------------|-------------|----------------------|-----------------------------|
| Compound                                                                                                                                                                                                                                                                | Chemical shift (ppm) | Multiplicity <sup>[b]</sup> | Compound    | Chemical shift (ppm) | Multiplicity <sup>[b]</sup> |
| <b>1a</b>                                                                                                                                                                                                                                                               | 0.67                 | <i>dd</i>                   | <b>I</b>    | -                    | -                           |
| <b>2a</b>                                                                                                                                                                                                                                                               | 1.06–1.13            | -                           | <b>II</b>   | -                    | -                           |
| <b>3a</b>                                                                                                                                                                                                                                                               | 1.04                 | <i>dd</i>                   | <b>III</b>  | 1.15                 | <i>dd</i>                   |
| <b>3b</b>                                                                                                                                                                                                                                                               | 1.07                 | <i>dd</i>                   | <b>IV</b>   | 1.10                 | <i>dd</i>                   |
| <b>4a</b>                                                                                                                                                                                                                                                               | -                    | -                           | <b>V</b>    | 1.02                 | <i>dd</i>                   |
| <b>5a</b>                                                                                                                                                                                                                                                               | 0.92                 | <i>dd</i>                   | <b>VI</b>   | 1.08                 | <i>dd</i>                   |
| <b>5b</b>                                                                                                                                                                                                                                                               | 0.91–0.96            | <sup>[c]</sup>              | <b>VII</b>  | 1.12                 | <i>dd</i>                   |
| <b>6a</b>                                                                                                                                                                                                                                                               | -                    | -                           | <b>VIII</b> | 1.14                 | <i>dd</i>                   |
| <b>7a</b>                                                                                                                                                                                                                                                               | 0.89                 | <i>dd</i>                   | <b>IX</b>   | 1.35                 | <i>dd</i>                   |
| <b>7b</b>                                                                                                                                                                                                                                                               | 1.03–1.06            | <sup>[c]</sup>              | <b>X</b>    | 1.12                 | <i>dd</i>                   |
| <b>8a</b>                                                                                                                                                                                                                                                               | -                    | -                           |             |                      |                             |

<sup>[a]</sup> Spectra were recorded in CDCl<sub>3</sub>. <sup>[b]</sup> *dd* = doublet of doublet. <sup>[c]</sup> The multiplicity could not be unambiguously determined due to the overlap with other signals.

## 5. Copies of HRMS reports of products

*tert*-Butyl ((1*S*,2*S*,4*R*)-1-((dimethylamino)methyl)-7,7-dimethylbicyclo[2.2.1]heptan-2-yl)carbamate (3a)

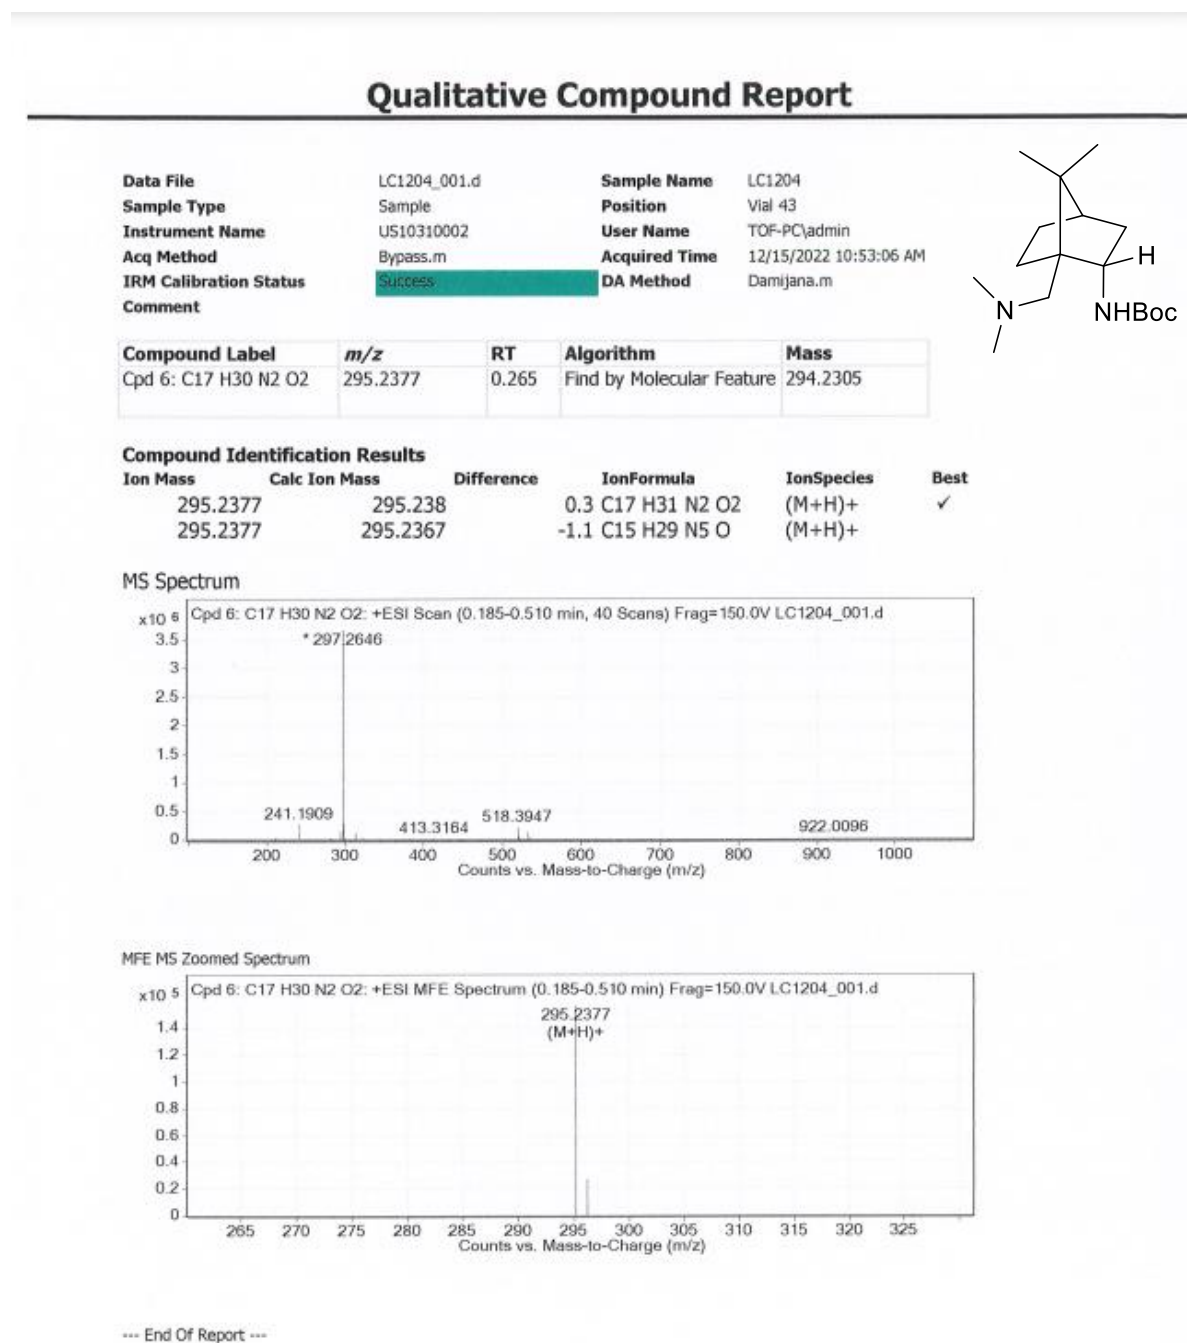

**tert-Butyl ((1S,2R,4R)-1-((dimethylamino)methyl)-7,7-dimethylbicyclo[2.2.1]heptan-2-yl)carbamate (4a)**

## Qualitative Compound Report

|                               |               |                      |                       |
|-------------------------------|---------------|----------------------|-----------------------|
| <b>Data File</b>              | LCDAG25_001.d | <b>Sample Name</b>   | LCDAG25               |
| <b>Sample Type</b>            | Sample        | <b>Position</b>      | Vial 17               |
| <b>Instrument Name</b>        | US10310002    | <b>User Name</b>     | TOF-PC\admin          |
| <b>Acq Method</b>             | Bypass.m      | <b>Acquired Time</b> | 1/10/2023 10:06:38 AM |
| <b>IRM Calibration Status</b> | Success       | <b>DA Method</b>     | Damijana.m            |
| <b>Comment</b>                |               |                      |                       |

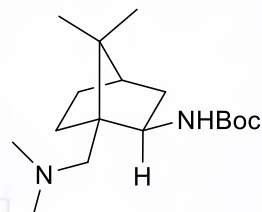

| Compound Label       | m/z      | RT    | Algorithm                 | Mass     |
|----------------------|----------|-------|---------------------------|----------|
| Cpd 4: C17 H32 N2 O2 | 297.2536 | 0.283 | Find by Molecular Feature | 296.2464 |

### Compound Identification Results

| Ion Mass | Calc Ion Mass | Difference | IonFormula    | IonSpecies | Best |
|----------|---------------|------------|---------------|------------|------|
| 297.2536 | 297.2537      | 0.1        | C17 H33 N2 O2 | (M+H)+     | ✓    |
| 297.2536 | 297.2523      | -1.2       | C15 H31 N5 O  | (M+H)+     |      |

### MS Spectrum

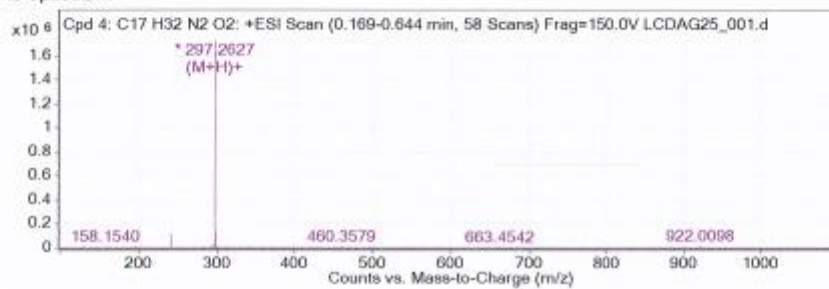

### MFE MS Zoomed Spectrum

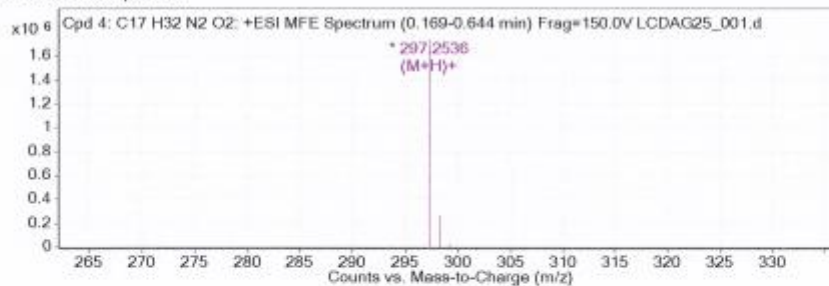

--- End Of Report ---





*tert*-Butyl ((1*S*,2*S*,4*R*)-7,7-dimethyl-1-(pyrrolidin-1-ylmethyl)bicyclo[2.2.1]heptan-2-yl)carbamate (3b)

## Qualitative Compound Report

|                               |              |                      |                       |
|-------------------------------|--------------|----------------------|-----------------------|
| <b>Data File</b>              | LC1192_001.d | <b>Sample Name</b>   | LC1192                |
| <b>Sample Type</b>            | Sample       | <b>Position</b>      | Vial 66               |
| <b>Instrument Name</b>        | US10310002   | <b>User Name</b>     | TOF-PC\admin          |
| <b>Acq Method</b>             | Bypass.m     | <b>Acquired Time</b> | 12/20/2022 2:12:08 PM |
| <b>IRM Calibration Status</b> | Success      | <b>DA Method</b>     | Damijana.m            |
| <b>Comment</b>                |              |                      |                       |

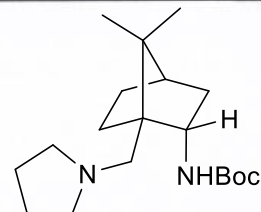

| Compound Label       | m/z      | RT    | Algorithm                 | Mass     |
|----------------------|----------|-------|---------------------------|----------|
| Cpd 2: C19 H34 N2 O2 | 323.2688 | 0.261 | Find by Molecular Feature | 322.2616 |

### Compound Identification Results

| Ion Mass | Calc Ion Mass | Difference | IonFormula        | IonSpecies | Best |
|----------|---------------|------------|-------------------|------------|------|
| 323.2688 | 323.2693      |            | 0.5 C19 H35 N2 O2 | (M+H)+     | ✓    |
| 323.2688 | 323.268       |            | -0.8 C17 H33 N5 O | (M+H)+     |      |

### MS Spectrum

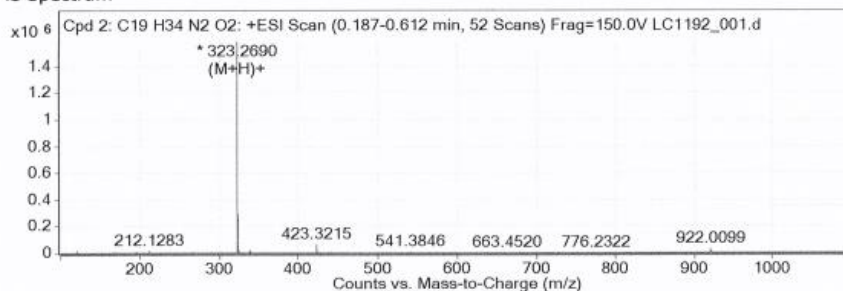

### MFE MS Zoomed Spectrum

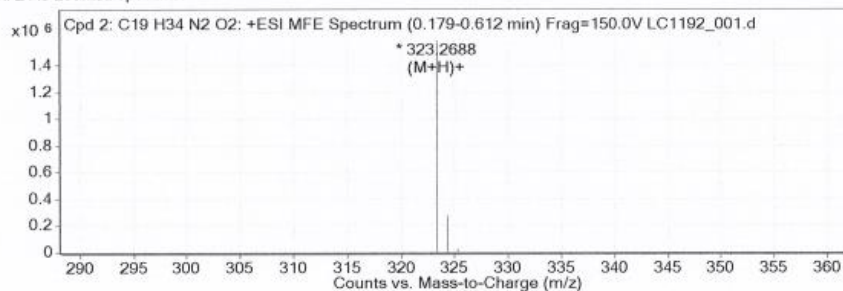

--- End Of Report ---

***N*-Benzyl-1-((1*S*,2*S*,4*R*)-2-((*tert*-butoxycarbonyl)amino)-7,7-dimethylbicyclo[2.2.1]heptan-1-yl)-*N,N*-dimethylmethanaminium bromide (5a)**

## Qualitative Compound Report

|                               |              |                      |                       |
|-------------------------------|--------------|----------------------|-----------------------|
| <b>Data File</b>              | LC1205_001.d | <b>Sample Name</b>   | LC1205                |
| <b>Sample Type</b>            | Sample       | <b>Position</b>      | Vial 65               |
| <b>Instrument Name</b>        | US10310002   | <b>User Name</b>     | TOF-PC\admin          |
| <b>Acq Method</b>             | Bypass.m     | <b>Acquired Time</b> | 12/20/2022 1:57:45 PM |
| <b>IRM Calibration Status</b> | Success      | <b>DA Method</b>     | Damijana.m            |
| <b>Comment</b>                |              |                      |                       |

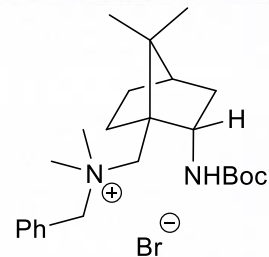

| Compound Label       | m/z      | RT    | Algorithm                 | Mass    |
|----------------------|----------|-------|---------------------------|---------|
| Cpd 2: C24 H38 N2 O2 | 387.3003 | 0.262 | Find by Molecular Feature | 386.293 |

### Compound Identification Results

| Ion Mass | Calc Ion Mass | Difference | IonFormula     | IonSpecies | Best |
|----------|---------------|------------|----------------|------------|------|
| 387.3003 | 387.3006      | 0.3        | C24 H39 N2 O2  | (M+H)+     | ✓    |
| 387.3003 | 387.2993      | -1         | C22 H37 N5 O   | (M+H)+     |      |
| 387.3003 | 387.3025      | 2.2        | C11 H37 N11 O4 | (M+H)+     |      |

### MS Spectrum

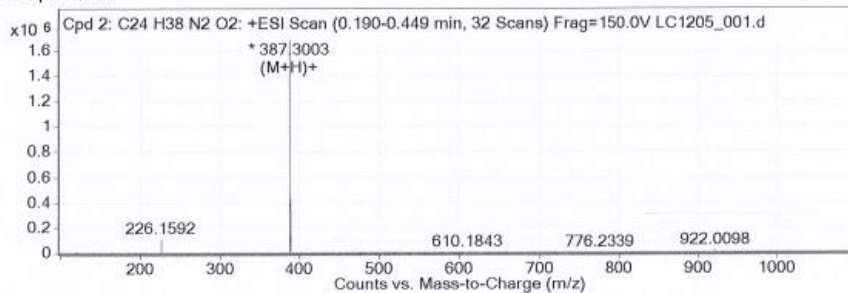

### MFE MS Zoomed Spectrum

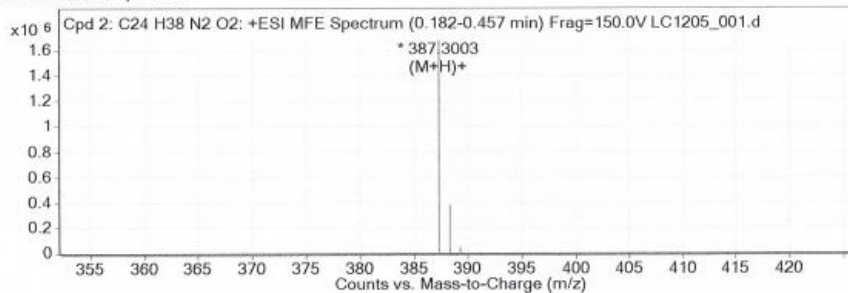

--- End Of Report ---

***N*-Benzyl-1-((1*S*,2*R*,4*R*)-2-((*tert*-butoxycarbonyl)amino)-7,7-dimethylbicyclo[2.2.1]heptan-1-yl)-*N,N*-dimethylmethanaminium bromide (6a)**

## Qualitative Compound Report

|                               |              |                      |                      |
|-------------------------------|--------------|----------------------|----------------------|
| <b>Data File</b>              | LC1157_001.d | <b>Sample Name</b>   | LC1157               |
| <b>Sample Type</b>            | Sample       | <b>Position</b>      | Vial 6               |
| <b>Instrument Name</b>        | US10310002   | <b>User Name</b>     | TOF-PC\admin         |
| <b>Acq Method</b>             | Bypass.m     | <b>Acquired Time</b> | 1/6/2023 11:10:57 AM |
| <b>IRM Calibration Status</b> | Success      | <b>DA Method</b>     | Damijana.m           |
| <b>Comment</b>                |              |                      |                      |

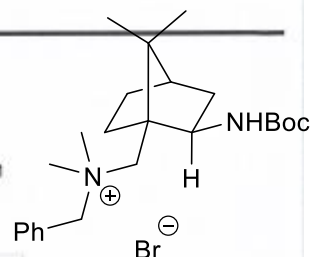

| Compound Label       | m/z      | RT    | Algorithm                 | Mass     |
|----------------------|----------|-------|---------------------------|----------|
| Cpd 5: C24 H38 N2 O2 | 387.3004 | 0.273 | Find by Molecular Feature | 386.2931 |

### Compound Identification Results

| Ion Mass | Calc Ion Mass | Difference | IonFormula     | IonSpecies | Best |
|----------|---------------|------------|----------------|------------|------|
| 387.3004 | 387.3006      | 0.2        | C24 H39 N2 O2  | (M+H)+     | ✓    |
| 387.3004 | 387.2993      | -1.1       | C22 H37 N5 O   | (M+H)+     |      |
| 387.3004 | 387.3025      | 2          | C11 H37 N11 O4 | (M+H)+     |      |

### MS Spectrum

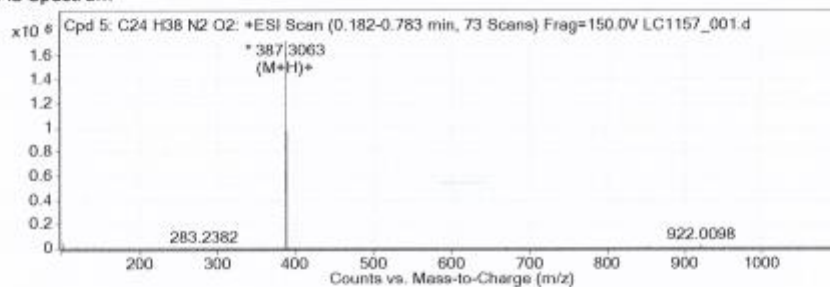

### MFE MS Zoomed Spectrum

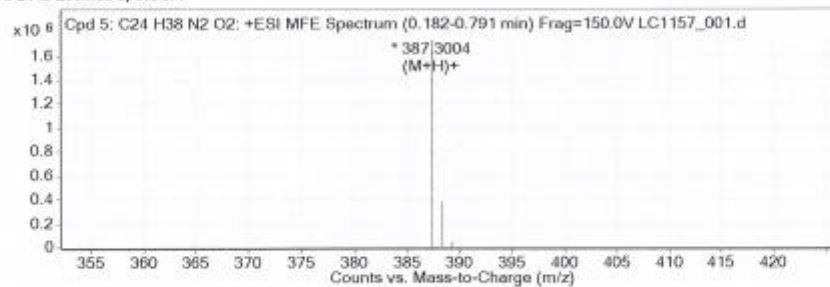

--- End Of Report ---



**1-Benzyl-1-(((1S,2S,4R)-2-((*tert*-butoxycarbonyl)amino)-7,7-dimethylbicyclo[2.2.1]heptan-1-yl)methyl)pyrrolidin-1-ium bromide (5b)**

## Qualitative Compound Report

|                               |              |                      |                        |
|-------------------------------|--------------|----------------------|------------------------|
| <b>Data File</b>              | LC1195_002.d | <b>Sample Name</b>   | LC1195                 |
| <b>Sample Type</b>            | Sample       | <b>Position</b>      | Vial 42                |
| <b>Instrument Name</b>        | US10310002   | <b>User Name</b>     | TOF-PC\admin           |
| <b>Acq Method</b>             | Bypass.m     | <b>Acquired Time</b> | 12/15/2022 10:59:08 AM |
| <b>IRM Calibration Status</b> | Success      | <b>DA Method</b>     | Damijana.m             |
| <b>Comment</b>                |              |                      |                        |

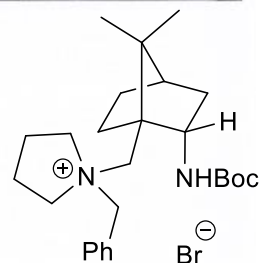

| Compound Label       | m/z      | RT    | Algorithm                 | Mass     |
|----------------------|----------|-------|---------------------------|----------|
| Cpd 2: C26 H40 N2 O2 | 413.3159 | 0.258 | Find by Molecular Feature | 412.3088 |

### Compound Identification Results

| Ion Mass | Calc Ion Mass | Difference | IonFormula     | IonSpecies | Best |
|----------|---------------|------------|----------------|------------|------|
| 413.3159 | 413.3163      | 0.3        | C26 H41 N2 O2  | (M+H)+     | ✓    |
| 413.3159 | 413.3149      | -1         | C24 H39 N5 O   | (M+H)+     |      |
| 413.3159 | 413.3181      | 2.2        | C13 H39 N11 O4 | (M+H)+     |      |

### MS Spectrum

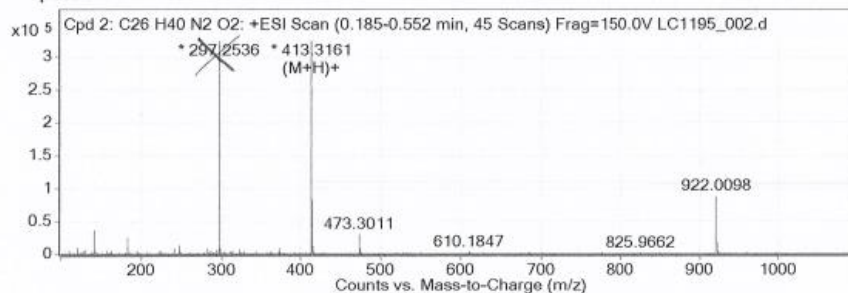

### MFE MS Zoomed Spectrum

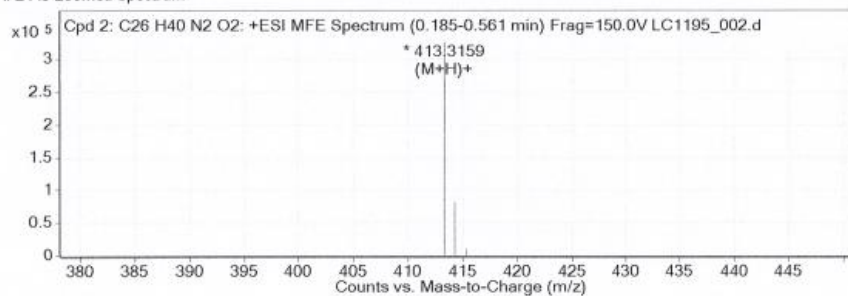

--- End Of Report ---

**(1*S*,2*S*,4*R*)-1-((Benzyldimethylammonio)methyl)-7,7-dimethylbicyclo[2.2.1]heptan-2-aminium 2,2,2-trifluoroacetate (7a)**

## Qualitative Compound Report

|                               |               |                      |                        |
|-------------------------------|---------------|----------------------|------------------------|
| <b>Data File</b>              | LC 1226_001.d | <b>Sample Name</b>   | LC 1226                |
| <b>Sample Type</b>            | Sample        | <b>Position</b>      | Vial 3                 |
| <b>Instrument Name</b>        | US10310002    | <b>User Name</b>     | TOF-PC\admin           |
| <b>Acq Method</b>             | Bypass.m      | <b>Acquired Time</b> | 12/13/2022 12:57:29 PM |
| <b>IRM Calibration Status</b> | Success       | <b>DA Method</b>     | Damijana.m             |
| <b>Comment</b>                |               |                      |                        |

| Compound Label    | m/z      | RT    | Algorithm                 | Mass     |
|-------------------|----------|-------|---------------------------|----------|
| Cpd 3: C19 H30 N2 | 287.2483 | 0.259 | Find by Molecular Feature | 286.2409 |

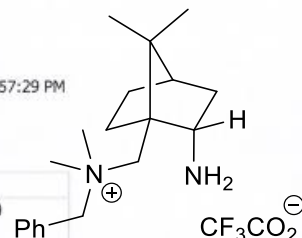

### Compound Identification Results

| Ion Mass | Calc Ion Mass | Difference | IonFormula | IonSpecies | Best |
|----------|---------------|------------|------------|------------|------|
| 287.2483 | 287.2482      | -0.1       | C19 H31 N2 | (M+H)+     | ✓    |

### MS Spectrum

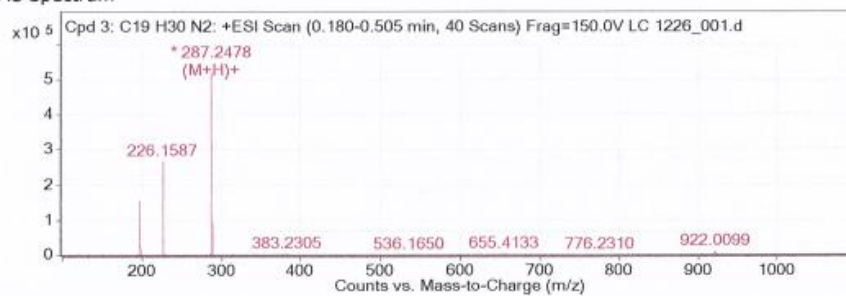

### MFE MS Zoomed Spectrum

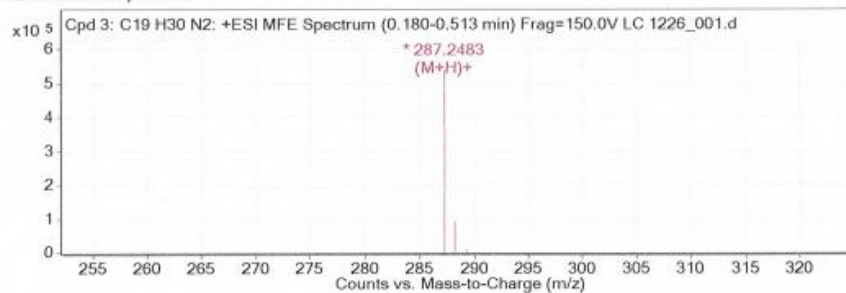

--- End Of Report ---

**(1S,2R,4R)-1-((Benzyldimethylammonio)methyl)-7,7-dimethylbicyclo[2.2.1]heptan-2-aminium 2,2,2-trifluoroacetate (8a)**

## Qualitative Compound Report

|                               |              |                      |                      |
|-------------------------------|--------------|----------------------|----------------------|
| <b>Data File</b>              | LC1159_001.d | <b>Sample Name</b>   | LC1159               |
| <b>Sample Type</b>            | Sample       | <b>Position</b>      | Vial 19              |
| <b>Instrument Name</b>        | US10310002   | <b>User Name</b>     | TOF-PC\admin         |
| <b>Acq Method</b>             | Bypass.m     | <b>Acquired Time</b> | 3/2/2021 11:35:10 AM |
| <b>IRM Calibration Status</b> | Success      | <b>DA Method</b>     | Damijana.m           |
| <b>Comment</b>                |              |                      |                      |

| Compound Label    | m/z      | RT   | Algorithm                 | Mass     |
|-------------------|----------|------|---------------------------|----------|
| Cpd 3: C19 H30 N2 | 287.2477 | 0.25 | Find by Molecular Feature | 286.2405 |

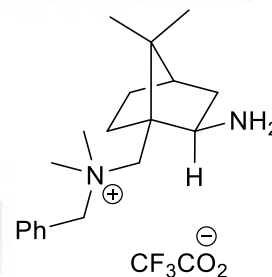

### Compound Identification Results

| Ion Mass | Calc Ion Mass | Difference | IonFormula | IonSpecies | Best |
|----------|---------------|------------|------------|------------|------|
| 287.2477 | 287.2482      | 0.5        | C19 H31 N2 | (M+H)+     | ✓    |

### MS Spectrum

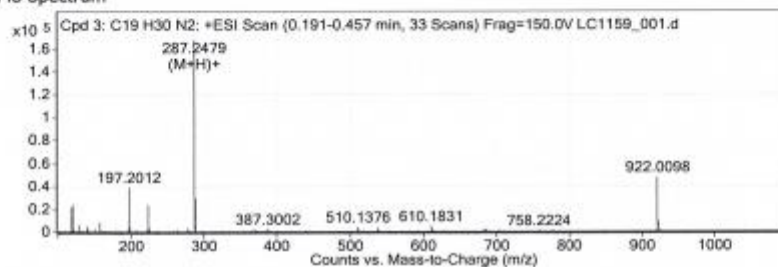

### MFE MS Zoomed Spectrum

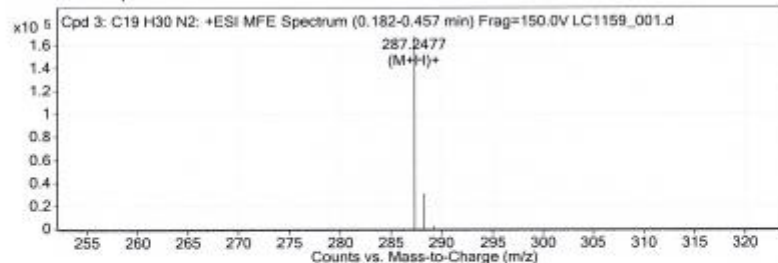

--- End Of Report ---



**1-(((1S,2S,4R)-2-Ammonio-7,7-dimethylbicyclo[2.2.1]heptan-1-yl)methyl)-1-benzylpyrrolidin-1-ium iodide (7b)**

## Qualitative Compound Report

|                               |              |                      |                       |
|-------------------------------|--------------|----------------------|-----------------------|
| <b>Data File</b>              | LC1202_001.d | <b>Sample Name</b>   | LC1202                |
| <b>Sample Type</b>            | Sample       | <b>Position</b>      | Vial 67               |
| <b>Instrument Name</b>        | US10310002   | <b>User Name</b>     | TOF-PC\admin          |
| <b>Acq Method</b>             | Bypass.m     | <b>Acquired Time</b> | 12/20/2022 2:14:32 PM |
| <b>IRM Calibration Status</b> | Success      | <b>DA Method</b>     | Damijana.m            |
| <b>Comment</b>                |              |                      |                       |

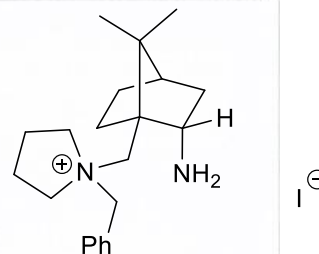

| Compound Label    | m/z      | RT    | Algorithm                 | Mass     |
|-------------------|----------|-------|---------------------------|----------|
| Cpd 4: C21 H32 N2 | 313.2635 | 0.261 | Find by Molecular Feature | 312.2564 |

### Compound Identification Results

| Ion Mass | Calc Ion Mass | Difference | IonFormula | IonSpecies | Best |
|----------|---------------|------------|------------|------------|------|
| 313.2635 | 313.2638      | 0.3        | C21 H33 N2 | (M+H)+     | ✓    |

### MS Spectrum

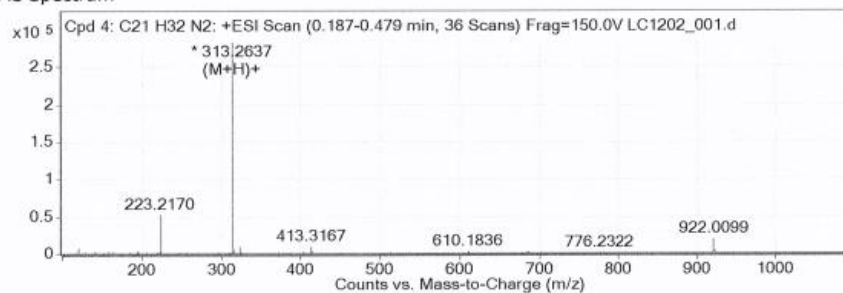

### MFE MS Zoomed Spectrum

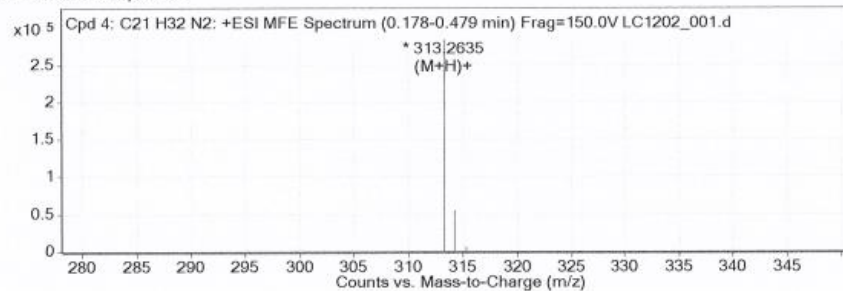

--- End Of Report ---



***N*-Benzyl-1-((1*R*,2*R*,4*R*)-2-(3-(3,5-bis(trifluoromethyl)phenyl)thioureido)-7,7-dimethylbicyclo[2.2.1]heptan-1-yl)-*N,N*-dimethylmethanaminium 2,2,2-trifluoroacetate (I)**

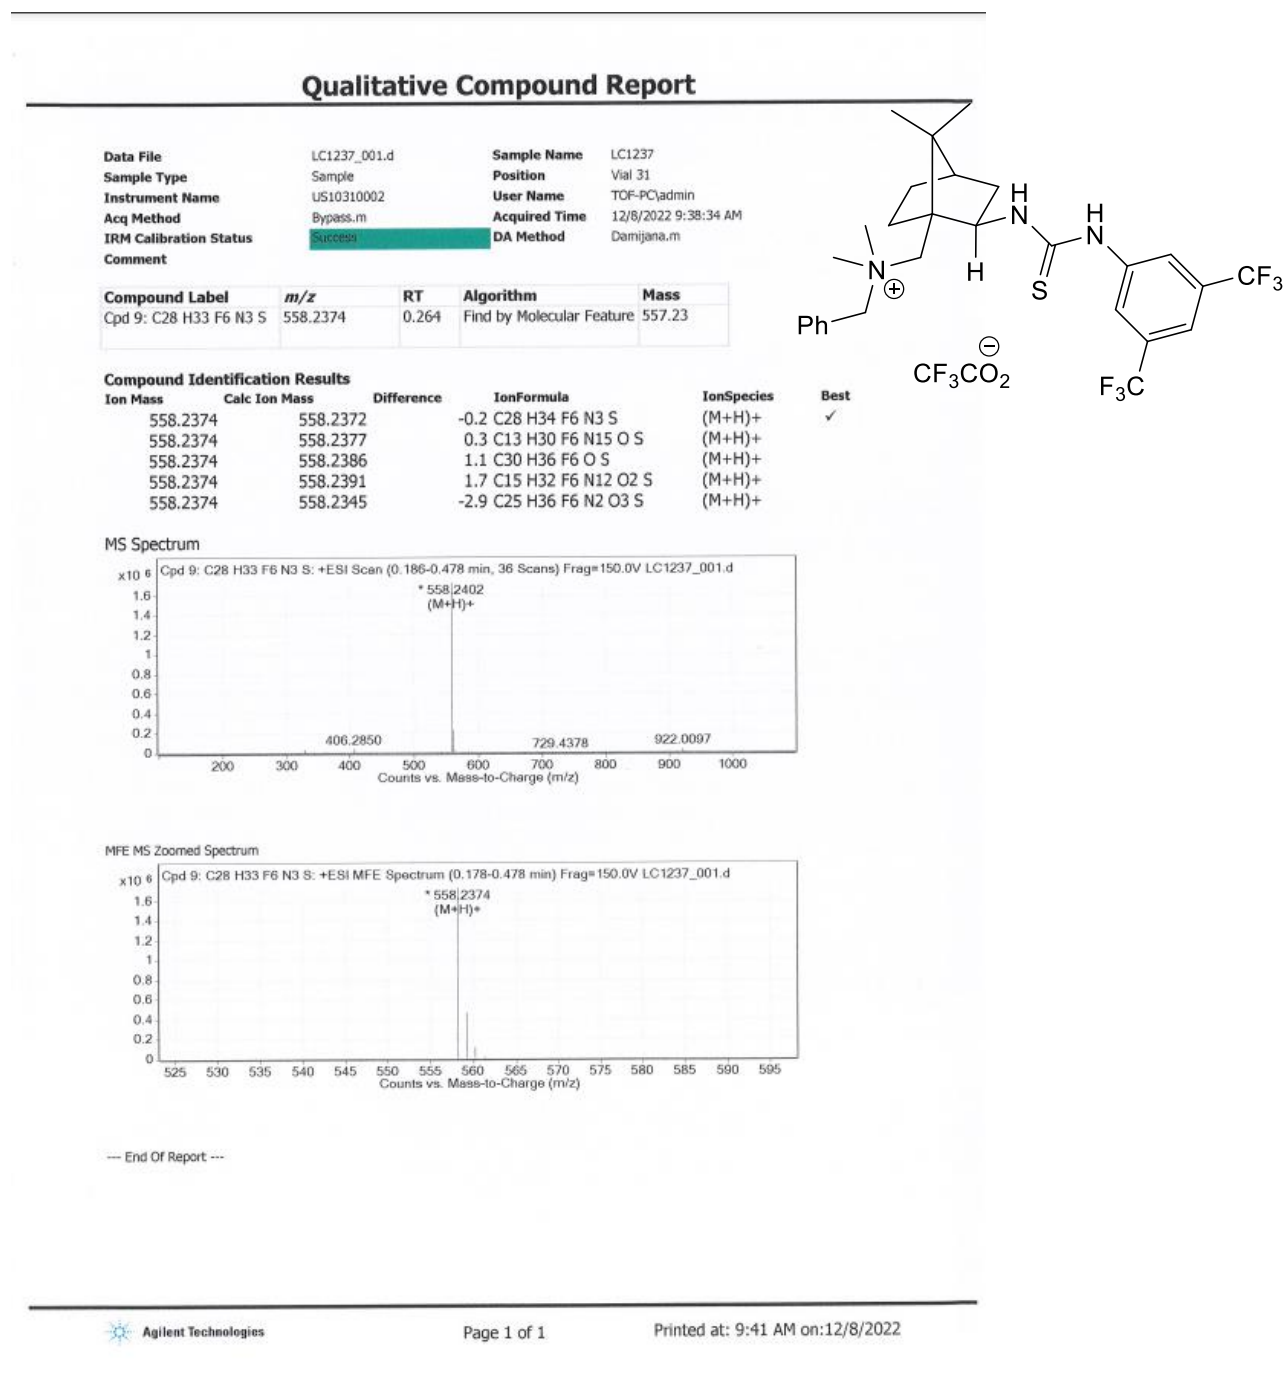

***N*-Benzyl-1-((1*R*,2*R*,4*R*)-2-(3-(3,5-bis(trifluoromethyl)phenyl)thioureido)-7,7-dimethylbicyclo[2.2.1]heptan-1-yl)-*N,N*-dimethylmethanaminium iodide (II)**

## Qualitative Compound Report

|                               |                |                      |                      |
|-------------------------------|----------------|----------------------|----------------------|
| <b>Data File</b>              | LC1237 1_001.d | <b>Sample Name</b>   | LC1237 1             |
| <b>Sample Type</b>            | Sample         | <b>Position</b>      | Vial 32              |
| <b>Instrument Name</b>        | US10310002     | <b>User Name</b>     | TOF-PC\admin         |
| <b>Acq Method</b>             | Bypass.m       | <b>Acquired Time</b> | 12/8/2022 9:43:33 AM |
| <b>IRM Calibration Status</b> | Success        | <b>DA Method</b>     | Damijana.m           |
| <b>Comment</b>                |                |                      |                      |

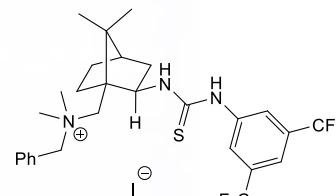

| Compound Label         | m/z      | RT    | Algorithm                 | Mass     |
|------------------------|----------|-------|---------------------------|----------|
| Cpd 4: C28 H33 F6 N3 S | 558.2365 | 0.259 | Find by Molecular Feature | 557.2294 |

### Compound Identification Results

| Ion Mass | Calc Ion Mass | Difference | IonFormula          | IonSpecies | Best |
|----------|---------------|------------|---------------------|------------|------|
| 558.2365 | 558.2372      | 0.8        | C28 H34 F6 N3 S     | (M+H)+     | ✓    |
| 558.2365 | 558.2377      | 1.3        | C13 H30 F6 N15 O S  | (M+H)+     |      |
| 558.2365 | 558.2345      | -1.9       | C25 H36 F6 N2 O3 S  | (M+H)+     |      |
| 558.2365 | 558.2386      | 2.1        | C30 H36 F6 O S      | (M+H)+     |      |
| 558.2365 | 558.2391      | 2.6        | C15 H32 F6 N12 O2 S | (M+H)+     |      |

### MS Spectrum

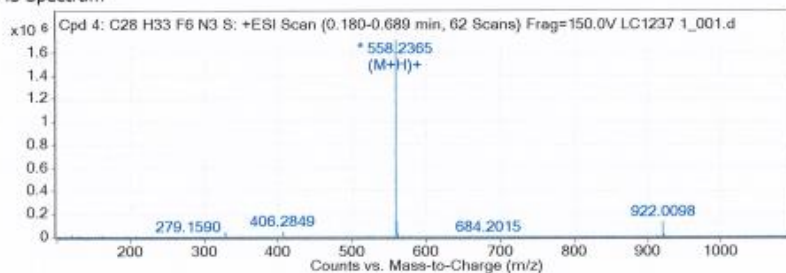

### MFE MS Zoomed Spectrum

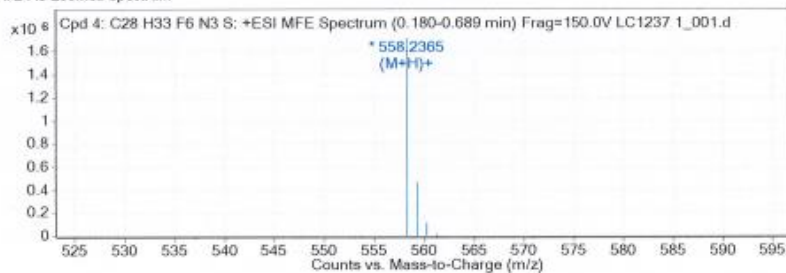

--- End Of Report ---

**1-Benzyl-1-(((1*S*,2*S*,4*R*)-2-(3-(3,5-bis(trifluoromethyl)phenyl)thioureido)-7,7-dimethylbicyclo[2.2.1]heptan-1-yl)methyl)pyrrolidin-1-ium iodide (III)**

### Qualitative Compound Report

|                               |                 |                      |                      |
|-------------------------------|-----------------|----------------------|----------------------|
| <b>Data File</b>              | LC 1209 1_001.d | <b>Sample Name</b>   | LC 1209 1            |
| <b>Sample Type</b>            | Sample          | <b>Position</b>      | Vial 45              |
| <b>Instrument Name</b>        | US10310002      | <b>User Name</b>     | TOF-PC\admin         |
| <b>Acq Method</b>             | Bypass.m        | <b>Acquired Time</b> | 4/21/2021 2:53:30 PM |
| <b>IRM Calibration Status</b> | Success         | <b>DA Method</b>     | Damijana.m           |
| <b>Comment</b>                |                 |                      |                      |

| Compound Label         | m/z      | RT    | Algorithm                 | Mass    |
|------------------------|----------|-------|---------------------------|---------|
| Cpd 1: C30 H35 F6 N3 S | 584.2519 | 0.258 | Find by Molecular Feature | 583.245 |

#### Compound Identification Results

| Ion Mass | Calc Ion Mass | Difference | IonFormula          | IonSpecies |
|----------|---------------|------------|---------------------|------------|
| 584.2519 | 584.252       | 0.1        | C14 H36 F6 N11 O5 S | (M+H)+     |
| 584.2519 | 584.252       | 0.1        | C13 H30 F6 N18 S    | (M+H)+     |
| 584.2519 | 584.2529      | 1          | C30 H36 F6 N3 S     | (M+H)+     |
| 584.2519 | 584.2534      | 1.5        | C15 H32 F6 N15 O S  | (M+H)+     |
| 584.2519 | 584.2534      | 1.5        | C16 H38 F6 N8 O6 S  | (M+H)+     |
| 584.2519 | 584.2502      | -1.7       | C27 H38 F6 N2 O3 S  | (M+H)+     |
| 584.2519 | 584.2542      | 2.3        | C32 H38 F6 O S      | (M+H)+     |
| 584.2519 | 584.2547      | 2.8        | C17 H34 F6 N12 O2 S | (M+H)+     |

#### MS Spectrum

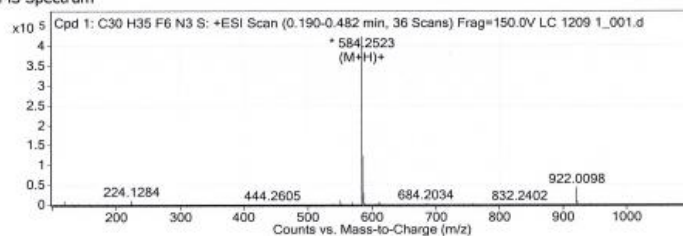

#### MFE MS Zoomed Spectrum

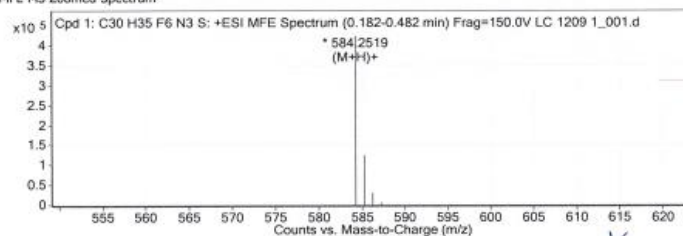

--- End Of Report ---

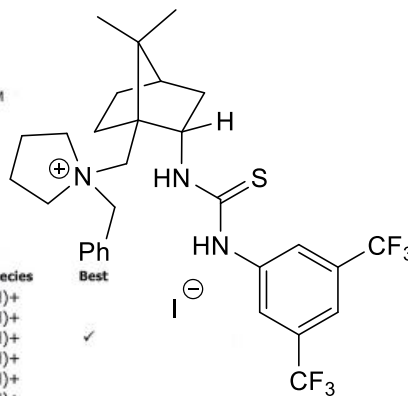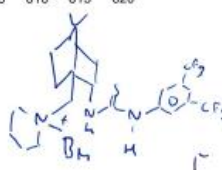

***N*-Benzyl-1-((1*R*,2*S*,4*R*)-2-(3-(3,5-bis(trifluoromethyl)phenyl)thioureido)-7,7-dimethylbicyclo[2.2.1]heptan-1-yl)-*N,N*-dimethylmethanaminium 2,2,2-trifluoroacetate (IV)**

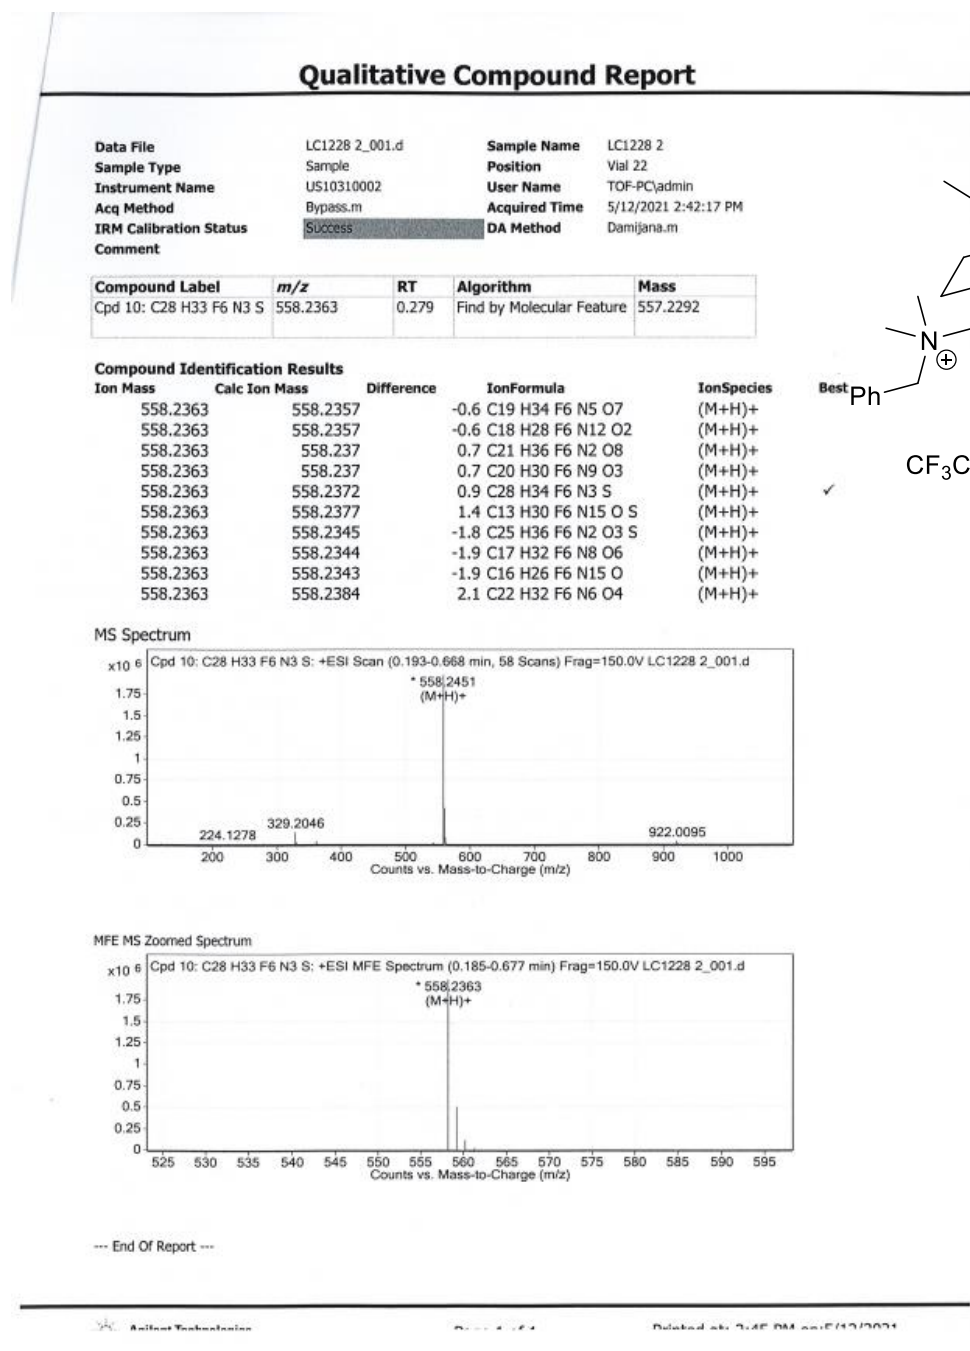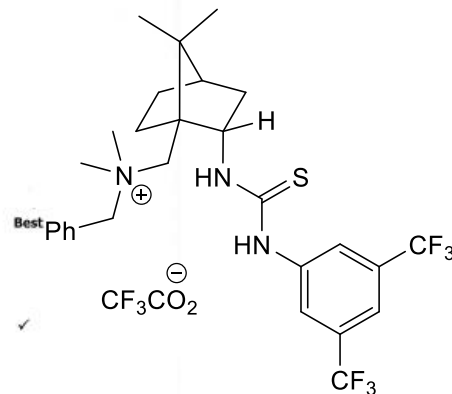

***N*-Benzyl-1-((1*R*,2*S*,4*R*)-2-(3-(3,5-bis(trifluoromethyl)phenyl)thioureido)-7,7-dimethylbicyclo[2.2.1]heptan-1-yl)-*N,N*-dimethylmethanaminium iodide (V)**

## Qualitative Compound Report

|                               |                |                      |                      |
|-------------------------------|----------------|----------------------|----------------------|
| <b>Data File</b>              | LC1228 I_001.d | <b>Sample Name</b>   | LC1228 I             |
| <b>Sample Type</b>            | Sample         | <b>Position</b>      | Vial 16              |
| <b>Instrument Name</b>        | US10310002     | <b>User Name</b>     | TOF-PC\admin         |
| <b>Acq Method</b>             | Bypass.m       | <b>Acquired Time</b> | 5/12/2021 2:25:31 PM |
| <b>IRM Calibration Status</b> | Success        | <b>DA Method</b>     | Damijana.m           |
| <b>Comment</b>                |                |                      |                      |

| Compound Label         | m/z      | RT    | Algorithm                 | Mass     |
|------------------------|----------|-------|---------------------------|----------|
| Cpd 1: C28 H33 F6 N3 S | 558.2368 | 0.259 | Find by Molecular Feature | 557.2296 |

### Compound Identification Results

| Ion Mass | Calc Ion Mass | Difference | IonFormula         | IonSpecies | Best |
|----------|---------------|------------|--------------------|------------|------|
| 558.2368 | 558.2368      | 0          | C18 H32 F8 N9 S    | (M+H)+     |      |
| 558.2368 | 558.237       | 0.2        | C23 H33 F7 N6 S    | (M+H)+     |      |
| 558.2368 | 558.2372      | 0.4        | C28 H34 F6 N3 S    | (M+H)+     | ✓    |
| 558.2368 | 558.2377      | 0.9        | C13 H30 F6 N15 O S | (M+H)+     |      |
| 558.2368 | 558.2357      | -1.1       | C22 H37 F7 N2 O4 S | (M+H)+     |      |
| 558.2368 | 558.238       | 1.2        | C15 H33 F9 N9 O S  | (M+H)+     |      |
| 558.2368 | 558.2382      | 1.4        | C20 H34 F8 N6 O S  | (M+H)+     |      |
| 558.2368 | 558.2384      | 1.6        | C25 H35 F7 N3 O S  | (M+H)+     |      |
| 558.2368 | 558.2386      | 1.8        | C30 H36 F6 O S     | (M+H)+     |      |
| 558.2368 | 558.2345      | -2.2       | C25 H36 F6 N2 O3 S | (M+H)+     |      |

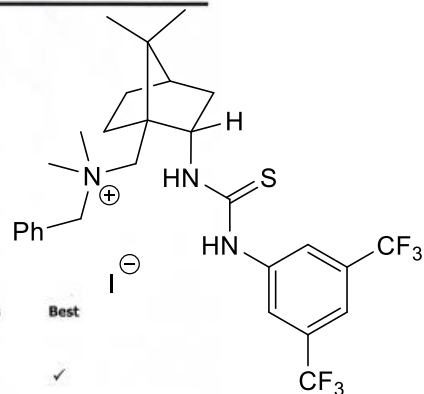

### MS Spectrum

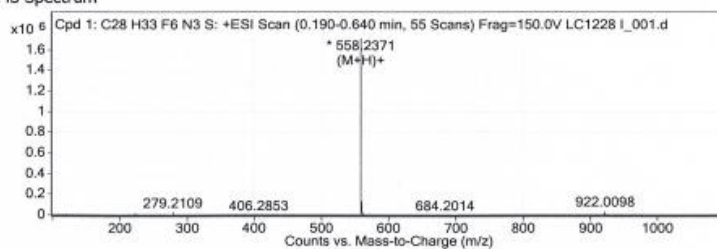

### MFE MS Zoomed Spectrum

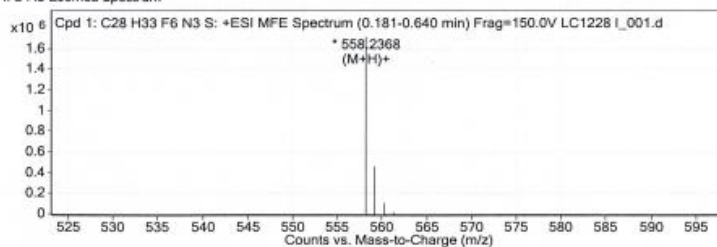

--- End Of Report ---

***N*-Benzyl-1-((1*R*,2*S*,4*R*)-7,7-dimethyl-2-(3-phenylthioureido)bicyclo[2.2.1]heptan-1-yl)-*N,N*-dimethylmethanaminium 2,2,2-trifluoroacetate (VI)**

## Qualitative Compound Report

|                               |              |                      |                      |
|-------------------------------|--------------|----------------------|----------------------|
| <b>Data File</b>              | LC1229_001.d | <b>Sample Name</b>   | LC1229               |
| <b>Sample Type</b>            | Sample       | <b>Position</b>      | Vial 21              |
| <b>Instrument Name</b>        | US10310002   | <b>User Name</b>     | TOF-PC\admin         |
| <b>Acq Method</b>             | Bypass.m     | <b>Acquired Time</b> | 5/12/2021 2:38:13 PM |
| <b>IRM Calibration Status</b> | Success      | <b>DA Method</b>     | Damijana.m           |
| <b>Comment</b>                |              |                      |                      |

| Compound Label                                          | <i>m/z</i> | RT    | Algorithm                 | Mass     |
|---------------------------------------------------------|------------|-------|---------------------------|----------|
| Cpd 1: C <sub>26</sub> H <sub>35</sub> N <sub>3</sub> S | 422.2618   | 0.261 | Find by Molecular Feature | 421.2546 |

### Compound Identification Results

| Ion Mass | Calc Ion Mass | Difference | IonFormula                                                      | IonSpecies         | Best <sup>⊖</sup> |
|----------|---------------|------------|-----------------------------------------------------------------|--------------------|-------------------|
| 422.2618 | 422.2623      | 0.5        | C <sub>18</sub> H <sub>32</sub> N <sub>9</sub> O <sub>3</sub>   | (M+H) <sup>+</sup> |                   |
| 422.2618 | 422.2623      | 0.5        | C <sub>19</sub> H <sub>38</sub> N <sub>2</sub> O <sub>8</sub>   | (M+H) <sup>+</sup> |                   |
| 422.2618 | 422.2624      | 0.7        | C <sub>26</sub> H <sub>36</sub> N <sub>3</sub> S                | (M+H) <sup>+</sup> |                   |
| 422.2618 | 422.2609      | -0.8       | C <sub>17</sub> H <sub>36</sub> N <sub>5</sub> O <sub>7</sub>   | (M+H) <sup>+</sup> |                   |
| 422.2618 | 422.2609      | -0.9       | C <sub>16</sub> H <sub>30</sub> N <sub>12</sub> O <sub>2</sub>  | (M+H) <sup>+</sup> |                   |
| 422.2618 | 422.2629      | 1.2        | C <sub>11</sub> H <sub>32</sub> N <sub>15</sub> O <sub>5</sub>  | (M+H) <sup>+</sup> |                   |
| 422.2618 | 422.2604      | -1.4       | C <sub>31</sub> H <sub>34</sub> O                               | (M+H) <sup>+</sup> |                   |
| 422.2618 | 422.2636      | 1.8        | C <sub>20</sub> H <sub>34</sub> N <sub>6</sub> O <sub>4</sub>   | (M+H) <sup>+</sup> |                   |
| 422.2618 | 422.2598      | -2         | C <sub>23</sub> H <sub>38</sub> N <sub>2</sub> O <sub>3</sub> S | (M+H) <sup>+</sup> |                   |
| 422.2618 | 422.2638      | 2          | C <sub>28</sub> H <sub>38</sub> O <sub>5</sub>                  | (M+H) <sup>+</sup> |                   |

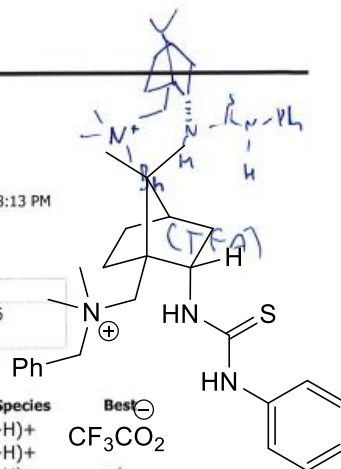

### MS Spectrum

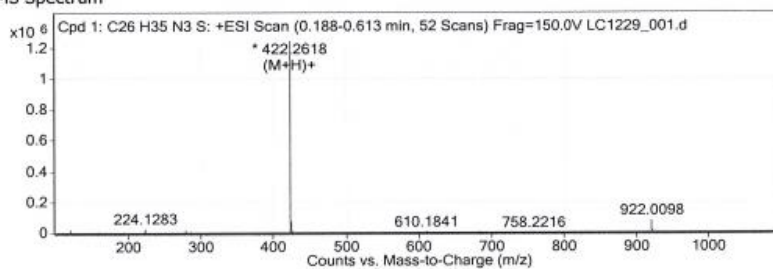

### MFE MS Zoomed Spectrum

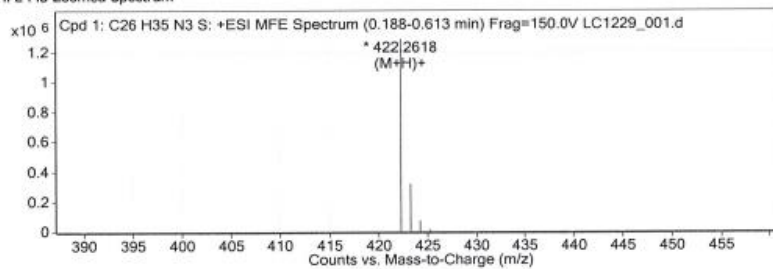

--- End Of Report ---



***N*-Benzyl-1-((1*R*,2*S*,4*R*)-7,7-dimethyl-2-(3-phenylureido)bicyclo[2.2.1]heptan-1-yl)-*N,N*-dimethylmethanaminium 2,2,2-trifluoroacetate (VII)**

### Qualitative Compound Report

|                               |              |                      |                      |
|-------------------------------|--------------|----------------------|----------------------|
| <b>Data File</b>              | LC1230_001.d | <b>Sample Name</b>   | LC1230               |
| <b>Sample Type</b>            | Sample       | <b>Position</b>      | Vial 17              |
| <b>Instrument Name</b>        | US10310002   | <b>User Name</b>     | TOF-PC\admin         |
| <b>Acq Method</b>             | Bypass.m     | <b>Acquired Time</b> | 5/12/2021 2:30:53 PM |
| <b>IRM Calibration Status</b> | Success      | <b>DA Method</b>     | Damijana.m           |
| <b>Comment</b>                |              |                      |                      |

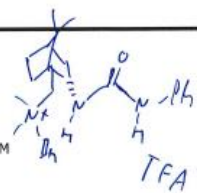

| Compound Label      | m/z     | RT    | Algorithm                 | Mass     |
|---------------------|---------|-------|---------------------------|----------|
| Cpd 2: C26 H35 N3 O | 406.285 | 0.266 | Find by Molecular Feature | 405.2777 |

#### Compound Identification Results

| Ion Mass | Calc Ion Mass | Difference | IonFormula     | IonSpecies |
|----------|---------------|------------|----------------|------------|
| 406.285  | 406.2853      | 0.2        | C26 H36 N3 O   | (M+H)+     |
| 406.285  | 406.2858      | 0.7        | C11 H32 N15 O2 | (M+H)+     |
| 406.285  | 406.2839      | -1.1       | C24 H34 N6     | (M+H)+     |
| 406.285  | 406.2866      | 1.6        | C28 H38 O2     | (M+H)+     |
| 406.285  | 406.2871      | 2.1        | C13 H34 N12 O3 | (M+H)+     |

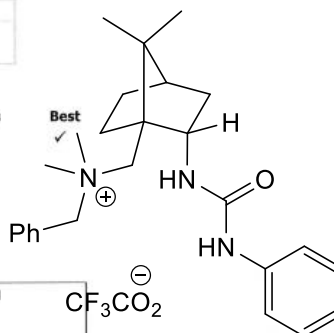

#### MS Spectrum

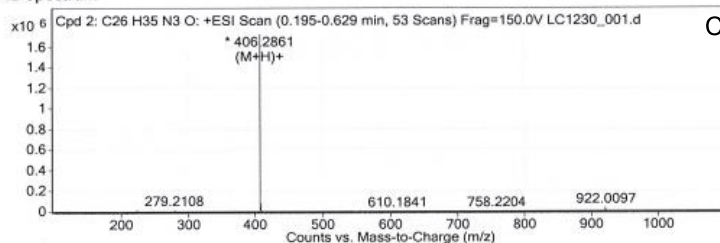

#### MFE MS Zoomed Spectrum

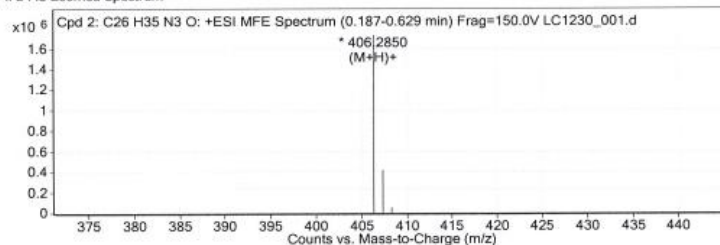

--- End Of Report ---

***N*-Benzyl-1-((1*R*,2*S*,4*R*)-7,7-dimethyl-2-(3-phenylureido)bicyclo[2.2.1]heptan-1-yl)-*N,N*-dimethylmethanaminium iodide (VIII)**

### Qualitative Compound Report

Data File: LC1219\_001.d  
Sample Type: Sample  
Instrument Name: US10310002  
Acq Method: Bypass.m  
IRM Calibration Status: Success  
Comment:  
Sample Name: LC1219  
Position: Vial 15  
User Name: TOF-PC/admin  
Acquired Time: 5/12/2021 2:23:50 PM  
DA Method: Damijana.m

| Compound Label      | m/z     | RT    | Algorithm                 | Mass     |
|---------------------|---------|-------|---------------------------|----------|
| Cpd 1: C26 H35 N3 O | 406.285 | 0.257 | Find by Molecular Feature | 405.2777 |

#### Compound Identification Results

| Ion Mass | Calc Ion Mass | Difference | IonFormula     | IonSpecies |
|----------|---------------|------------|----------------|------------|
| 406.285  | 406.2853      | 0.3        | C26 H36 N3 O   | (M+H)+     |
| 406.285  | 406.2858      | 0.8        | C11 H32 N15 O2 | (M+H)+     |
| 406.285  | 406.2839      | -1         | C24 H34 N6     | (M+H)+     |
| 406.285  | 406.2866      | 1.7        | C28 H38 O2     | (M+H)+     |
| 406.285  | 406.2871      | 2.2        | C13 H34 N12 O3 | (M+H)+     |

#### MS Spectrum

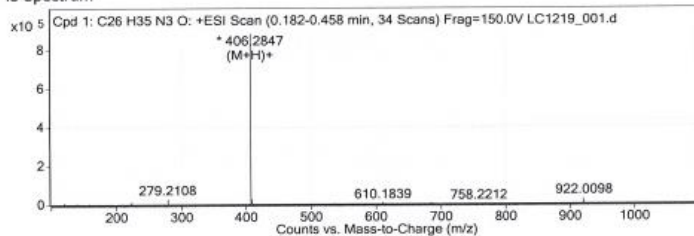

#### MFE MS Zoomed Spectrum

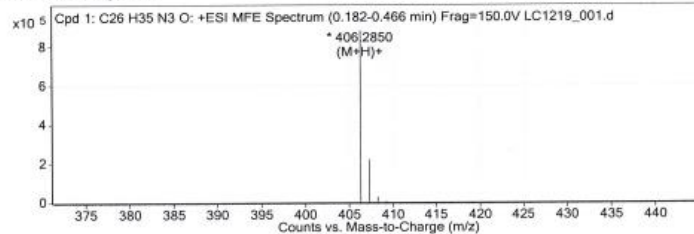

--- End Of Report ---

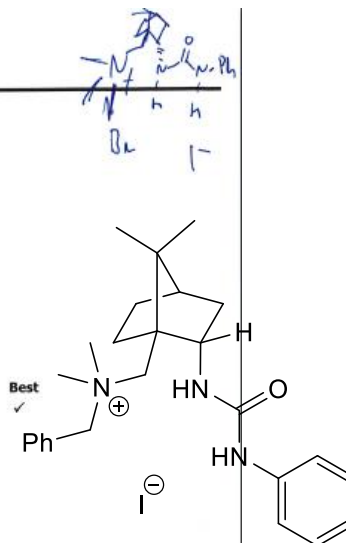



***N*-Benzyl-1-((1*R*,2*S*,4*R*)-2-((2-((3,5-bis(trifluoromethyl)phenyl)amino)-3,4-dioxocyclobut-1-en-1-yl)amino)-7,7-dimethylbicyclo[2.2.1]heptan-1-yl)-*N,N*-dimethylmethanaminium 2,2,2-trifluoroacetate (IX)**

### Qualitative Compound Report

|                               |              |                      |                     |
|-------------------------------|--------------|----------------------|---------------------|
| <b>Data File</b>              | LC1231_001.d | <b>Sample Name</b>   | LC1231              |
| <b>Sample Type</b>            | Sample       | <b>Position</b>      | Vial 28             |
| <b>Instrument Name</b>        | US10310002   | <b>User Name</b>     | TOF-PC\admin        |
| <b>Acq Method</b>             | Bypass.m     | <b>Acquired Time</b> | 5/4/2021 1:50:20 PM |
| <b>IRM Calibration Status</b> | Success      | <b>DA Method</b>     | Damijana.m          |
| <b>Comment</b>                |              |                      |                     |

| Compound Label          | m/z      | RT    | Algorithm                 | Mass     |
|-------------------------|----------|-------|---------------------------|----------|
| Cpd 1: C31 H33 F6 N3 O2 | 594.2545 | 0.261 | Find by Molecular Feature | 593.2474 |

#### Compound Identification Results

| Ion Mass | Calc Ion Mass | Difference | IonFormula        | IonSpecies |
|----------|---------------|------------|-------------------|------------|
| 594.2545 | 594.255       | 0.4        | C31 H34 F6 N3 O2  | (M+H)+     |
| 594.2545 | 594.2541      | -0.4       | C15 H34 F6 N11 O7 | (M+H)+     |
| 594.2545 | 594.2536      | -0.9       | C29 H32 F6 N6 O   | (M+H)+     |
| 594.2545 | 594.2555      | 0.9        | C16 H30 F6 N15 O3 | (M+H)+     |
| 594.2545 | 594.2555      | 0.9        | C17 H36 F6 N8 O8  | (M+H)+     |
| 594.2545 | 594.2563      | 1.8        | C33 H36 F6 O3     | (M+H)+     |
| 594.2545 | 594.2523      | -2.2       | C28 H36 F6 N2 O5  | (M+H)+     |
| 594.2545 | 594.2523      | -2.2       | C27 H30 F6 N9     | (M+H)+     |
| 594.2545 | 594.2568      | 2.3        | C18 H32 F6 N12 O4 | (M+H)+     |
| 594.2545 | 594.2568      | 2.3        | C19 H38 F6 N5 O9  | (M+H)+     |

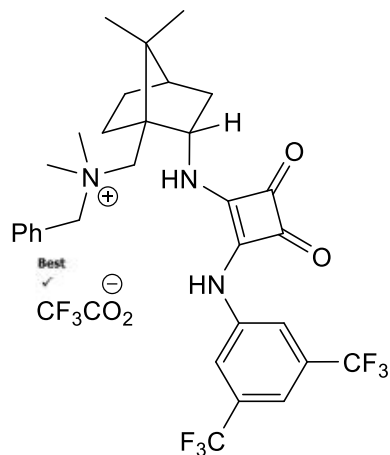

#### MS Spectrum

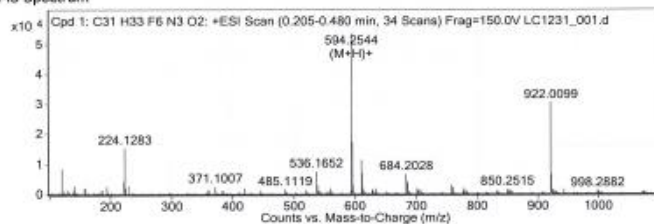

#### MFE MS Zoomed Spectrum

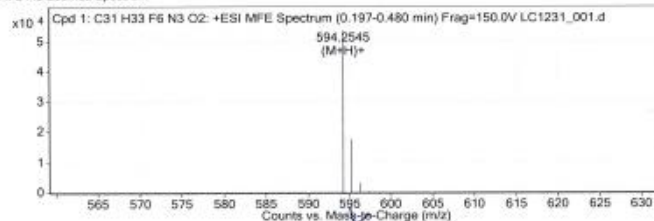

--- End Of Report ---

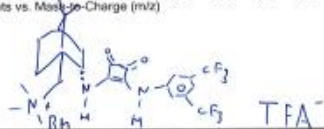

**1-benzyl-1-(((1S,2S,4R)-7,7-dimethyl-2-(3-phenylthioureido)bicyclo[2.2.1]heptan-1-yl)methyl)pyrrolidin-1-ium iodide (X)**

## Qualitative Compound Report

**Data File** LC1210\_001.d **Sample Name** LC1210  
**Sample Type** Sample **Position** Vial 34  
**Instrument Name** US10310002 **User Name** TOF-PC/admin  
**Acq Method** Bypass.m **Acquired Time** 12/8/2022 9:52:38 AM  
**IRM Calibration Status** Success **DA Method** Damijana.m  
**Comment**

| Compound Label      | m/z      | RT    | Algorithm                 | Mass     |
|---------------------|----------|-------|---------------------------|----------|
| Cpd 5: C28 H37 N3 S | 448.2776 | 0.257 | Find by Molecular Feature | 447.2704 |

### Compound Identification Results

| Ion Mass | Calc Ion Mass | Difference | IonFormula       | IonSpecies | Best |
|----------|---------------|------------|------------------|------------|------|
| 448.2776 | 448.2773      | -0.3       | C12 H38 N11 O5 S | (M+H)+     |      |
| 448.2776 | 448.2781      | 0.5        | C28 H38 N3 S     | (M+H)+     | ✓    |
| 448.2776 | 448.2786      | 1          | C13 H34 N15 O S  | (M+H)+     |      |
| 448.2776 | 448.2786      | 1          | C14 H40 N8 O6 S  | (M+H)+     |      |
| 448.2776 | 448.2794      | 1.9        | C30 H40 O S      | (M+H)+     |      |
| 448.2776 | 448.2754      | -2.2       | C25 H40 N2 O3 S  | (M+H)+     |      |
| 448.2776 | 448.2799      | 2.4        | C15 H36 N12 O2 S | (M+H)+     |      |

### MS Spectrum

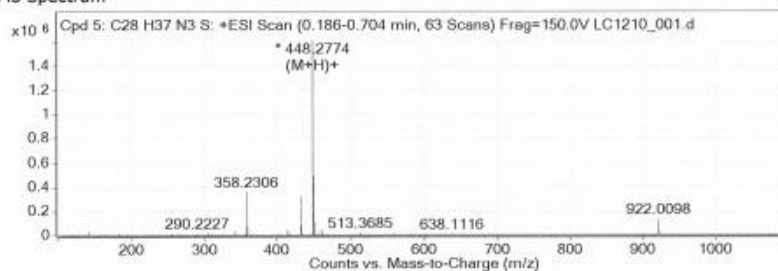

### MFE MS Zoomed Spectrum

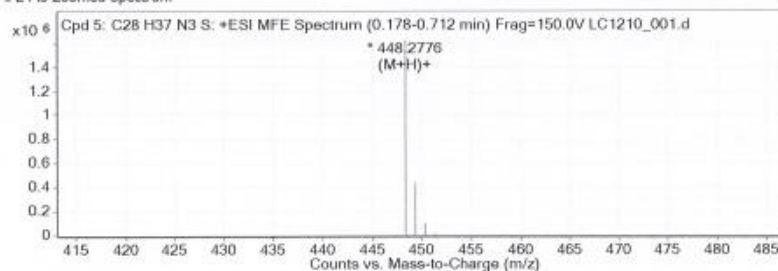

--- End Of Report ---

## 6. X-Ray crystallography

**Table S8.** Crystal data and structure refinement for compound **VI-Br**.

|                                                                              |                                                    |
|------------------------------------------------------------------------------|----------------------------------------------------|
| Empirical formula                                                            | C <sub>26</sub> H <sub>36</sub> BrN <sub>3</sub> S |
| Formula weight                                                               | 502.55                                             |
| Temperature/K                                                                | 149.9(3)                                           |
| Crystal system                                                               | monoclinic                                         |
| Space group                                                                  | P2 <sub>1</sub>                                    |
| <i>a</i> [Å <sup>3</sup> ]                                                   | 12.4910(10)                                        |
| <i>b</i> [Å <sup>3</sup> ]                                                   | 9.1813(4)                                          |
| <i>c</i> [Å <sup>3</sup> ]                                                   | 12.5429(9)                                         |
| <i>α</i> [°]                                                                 | 90                                                 |
| <i>β</i> [°]                                                                 | 118.740(9)                                         |
| <i>γ</i> [°]                                                                 | 90                                                 |
| <i>V</i> [Å <sup>3</sup> ]                                                   | 1261.26(17)                                        |
| <i>Z</i>                                                                     | 2                                                  |
| $\rho_{\text{calc}}$ [g/cm <sup>3</sup> ]                                    | 1.323                                              |
| $\mu$ [mm <sup>-1</sup> ]                                                    | 1.730                                              |
| <i>F</i> (000)                                                               | 528.0                                              |
| Crystal size/mm <sup>3</sup>                                                 | 0.6 × 0.5 × 0.4                                    |
| Radiation                                                                    | MoK $\alpha$ ( $\lambda$ = 0.71073)                |
| Reflections collected                                                        | 11048                                              |
| Independent reflections                                                      | 6225                                               |
| <i>R</i> <sub>int</sub>                                                      | 0.0295                                             |
| Data/restraints/parameters                                                   | 6225/0/284                                         |
| GOF                                                                          | 1.052                                              |
| <i>R</i> <sub>1</sub> , <i>wR</i> <sub>2</sub> [ <i>I</i> ≥ 2σ ( <i>I</i> )] | 0.0506, 0.1378                                     |
| <i>R</i> <sub>1</sub> , <i>wR</i> <sub>2</sub> (all data)                    | 0.0608, 0.1469                                     |
| (Δρ) <sub>max</sub> [e Å <sup>-3</sup> ]                                     | 0.64                                               |
| (Δρ) <sub>min</sub> [e Å <sup>-3</sup> ]                                     | −1.11                                              |
| Flack parameter                                                              | 0.036(5)                                           |

**Table S9.** Crystal data and structure refinement for compound **III**.

|                                                                              |                                                                  |
|------------------------------------------------------------------------------|------------------------------------------------------------------|
| Empirical formula                                                            | C <sub>30</sub> H <sub>36</sub> F <sub>6</sub> IN <sub>3</sub> S |
| Formula weight                                                               | 711.58                                                           |
| Temperature/K                                                                | 150.00(10)                                                       |
| Crystal system                                                               | orthorhombic                                                     |
| Space group                                                                  | P2 <sub>1</sub> 2 <sub>1</sub> 2 <sub>1</sub>                    |
| <i>a</i> [Å <sup>3</sup> ]                                                   | 10.8722(3)                                                       |
| <i>b</i> [Å <sup>3</sup> ]                                                   | 14.7059(6)                                                       |
| <i>c</i> [Å <sup>3</sup> ]                                                   | 19.2008(7)                                                       |
| <i>α</i> [°]                                                                 | 90                                                               |
| <i>β</i> [°]                                                                 | 90                                                               |
| <i>γ</i> [°]                                                                 | 90                                                               |
| <i>V</i> [Å <sup>3</sup> ]                                                   | 3069.93(19)                                                      |
| <i>Z</i>                                                                     | 4                                                                |
| <i>ρ</i> <sub>calc</sub> [g/cm <sup>3</sup> ]                                | 1.540                                                            |
| <i>μ</i> [mm <sup>-1</sup> ]                                                 | 1.172                                                            |
| <i>F</i> (000)                                                               | 1440.0                                                           |
| Crystal size/mm <sup>3</sup>                                                 | 0.4 × 0.2 × 0.2                                                  |
| Radiation                                                                    | MoK $\alpha$ ( $\lambda$ = 0.71073)                              |
| Reflections collected                                                        | 29198                                                            |
| Independent reflections                                                      | 8371                                                             |
| <i>R</i> <sub>int</sub>                                                      | 0.0386                                                           |
| Data/restraints/parameters                                                   | 8371/0/382                                                       |
| GOF                                                                          | 1.035                                                            |
| <i>R</i> <sub>1</sub> , <i>wR</i> <sub>2</sub> [ <i>I</i> ≥ 2σ ( <i>I</i> )] | 0.0443, 0.1029                                                   |
| <i>R</i> <sub>1</sub> , <i>wR</i> <sub>2</sub> (all data)                    | 0.0590, 0.1151                                                   |
| ( $\Delta\rho$ ) <sub>max</sub> [e Å <sup>-3</sup> ]                         | 0.97                                                             |
| ( $\Delta\rho$ ) <sub>min</sub> [e Å <sup>-3</sup> ]                         | −1.40                                                            |
| Flack parameter                                                              | −0.031(8)                                                        |

## General Information

Single-crystal X-ray diffraction data was collected on Agilent Technologies SuperNova Dual diffractometer with an Atlas detector using monochromated Mo-K $\alpha$  radiation ( $\lambda = 0.71073$  Å) at 150 K. The data was processed using CrysAlis PRO<sup>8</sup>. Using Olex2.1.2.<sup>9</sup>, the structures were solved by direct methods implemented in SHELXS<sup>10</sup> or SHELXT<sup>11</sup> and refined by a full-matrix least-squares procedure based on F<sup>2</sup> with SHELXT-2014/7<sup>12</sup>. All nonhydrogen atoms were refined anisotropically. Hydrogen atoms were placed in geometrically calculated positions and were refined using a riding model. The drawings and the analysis of bond lengths, angles and intermolecular interactions were carried out using Mercury<sup>13</sup> and Platon<sup>14</sup> (Figure S2 and S3). Structural and other crystallographic details on data collection and refinement for compounds **VI-Br** and **III** have been deposited with the Cambridge Crystallographic Data Centre as supplementary publication number CCDC Deposition Numbers **2204647** and **2204648**, respectively. These data can be obtained free of charge via [www.ccdc.cam.ac.uk/conts/retrieving.html](http://www.ccdc.cam.ac.uk/conts/retrieving.html) (or from the CCDC, 12 Union Road, Cambridge CB2 1EZ, UK; fax: +44 1223 336033; e-mail: [deposit@ccdc.cam.ac.uk](mailto:deposit@ccdc.cam.ac.uk)).

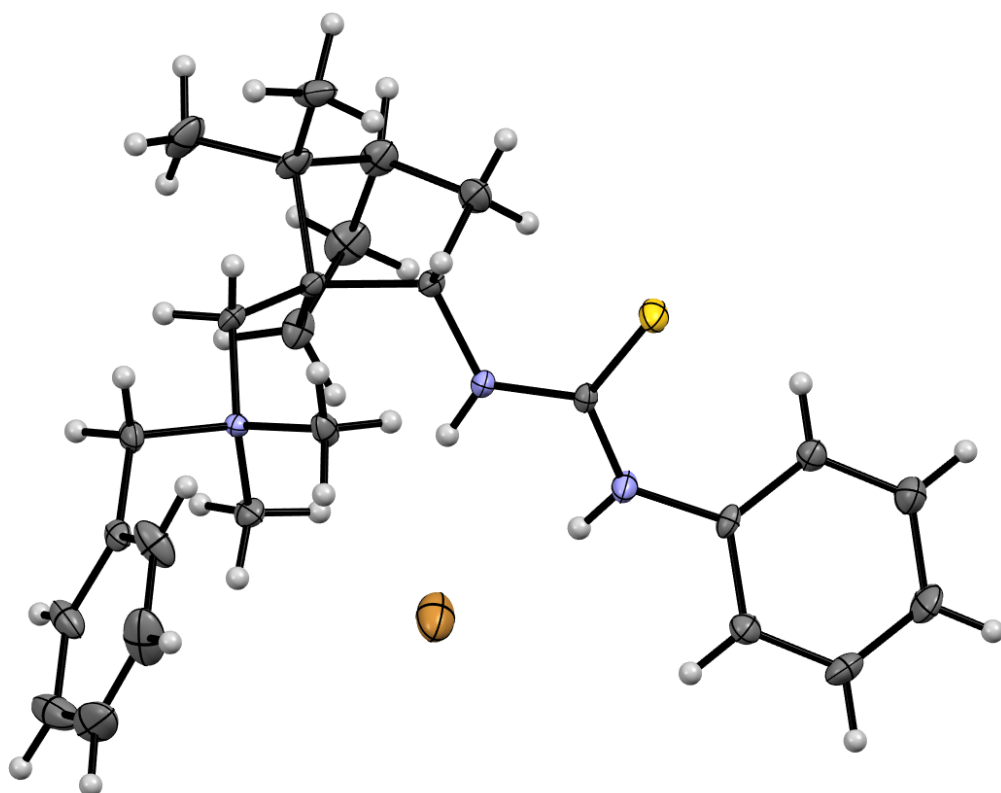

**Figure S2.** Molecular structure of compound **VI-Br**. Thermal ellipsoids are shown at 50% probability.

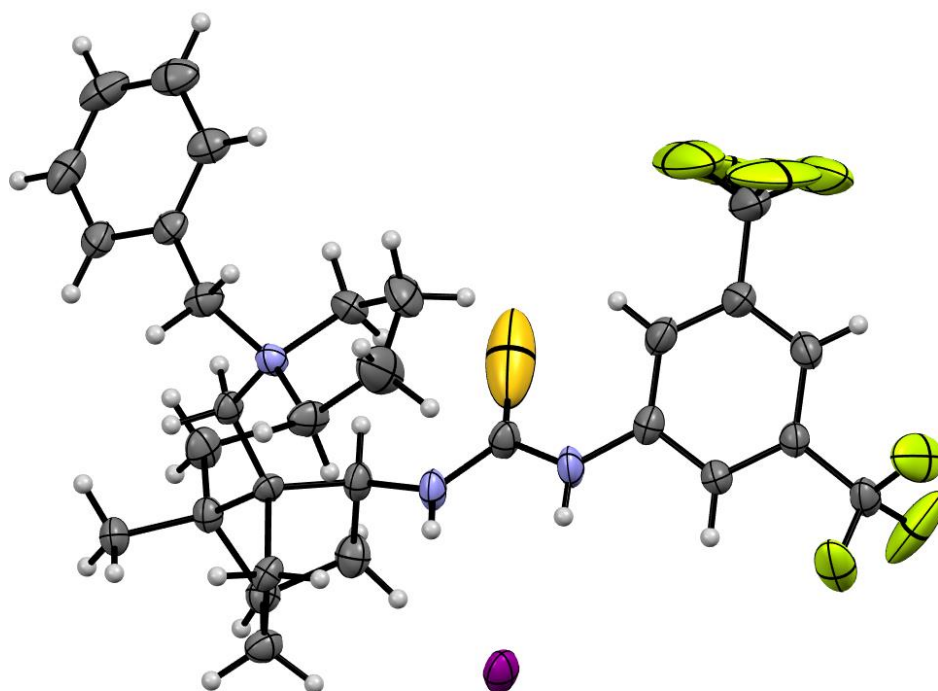

**Figure S3.** Molecular structure of compound **III**. Thermal ellipsoids are shown at 50% probability.

## 7. References

- 
- <sup>1</sup> Ričko, S.; Svete, J.; Štefane, B.; Perdih, A.; Golobič, A.; Meden, A.; Grošelj, U. 1,3-Diamine-Derived Bifunctional Organocatalyst Prepared from Camphor. *Adv. Synth. Catal.* **2016**, *358*, 3786–3796. <https://doi.org/10.1002/adsc.201600498>.
- <sup>2</sup> Xu, J.; Hu, Y.; Huang, D.; Wang, K.-H.; Xu, C.; Niua T. Thiourea-Catalyzed Enantioselective Fluorination of  $\beta$ -Keto Esters. *Adv. Synth. Catal.* **2012**, *354*, 515–526. <https://doi.org/10.1002/adsc.201100660>.
- <sup>3</sup> Novacek, J.; Waser, M. Syntheses and Applications of (Thio)Urea-Containing Chiral Quaternary Ammonium Salt Catalysts. *Eur. J. Org. Chem.* **2013**, *4*, 802–809. <https://doi.org/10.1002/ejoc.201301594>.
- <sup>4</sup> Novacek, J.; Monkowius, U.; Himmelsbach, M.; Waser, M. Asymmetric  $\alpha$ -chlorination of  $\beta$ -ketoesters using bifunctional ammonium salt catalysis. *Monatsh Chem.* **2016**, *147*, 533–538. <https://doi.org/10.1007/s00706-015-1604-7>.
- <sup>5</sup> Mairhofer, C.; Novacek, J.; Waser, M. Synergistic Ammonium (Hypo)Iodite/Imine Catalysis for the Asymmetric  $\alpha$ -Hydroxylation of  $\beta$ -Ketoesters. *Org. Lett.* **2020**, *22*, 15, 6138–6142. <https://doi.org/10.1021/acs.orglett.0c02198>.
- <sup>6</sup> Haider, V.; Kreuzer, V.; Tiffner, M.; Spingler, B.; Waser, M. Ammonium Salt-Catalyzed Ring-Opening of Aryl-Aziridines with  $\beta$ -Keto Esters. *Eur. J. Org. Chem.* **2020**, *32*, 5173–5177. <https://doi.org/10.1002/ejoc.202000916>.
- <sup>7</sup> Tiffner, M.; Novacek, J.; Busillo, A.; Gratzner, K.; Massa, A.; Waser, M. Design of chiral urea-quaternary ammonium salt hybrid catalysts for asymmetric reactions of glycine Schiff bases. *RSC Adv.* **2015**, *5*, 78941–78949. <https://doi.org/10.1039/C5RA14466C>.
- <sup>8</sup> *CrysAlis PRO*, Agilent Technologies UK Ltd, Yarnton, Oxfordshire, England, **2011**.
- <sup>9</sup> Dolomanov, O.V.; Bourhis, L.J.; Gildea, R.J.; Howard, J.A.K.; Puschmann, H. *OLEX2*: a complete structure solution, refinement and analysis program, *J. Appl. Crystallogr.* **2009**, *42*, 339–341. <https://doi.org/10.1107/S0021889808042726>.
- <sup>10</sup> Sheldrick, G.M. A short history of *SHELX*, *Acta Crystallogr. A* **2008**, *64*, 112–122. <https://doi.org/10.1107/S0108767307043930>.



- 
- <sup>11</sup> Sheldrick, G.M. *SHELXT* - Integrated space-group and crystal-structure determination, *Acta Crystallogr. Sect. A Found. Adv.* **2015**, *71*, 3–8. <https://doi.org/10.1107/S2053273314026370>.
- <sup>12</sup> Sheldrick, G.M. Crystal structure refinement with *SHELXL*, *Acta Crystallogr. Sect. C Struct. Chem.* **2015**, *71*, 3–8. <https://doi.org/10.1107/S2053229614024218>.
- <sup>13</sup> Macrae, C.F.; Edgington, P.R.; McCabe, P.; Pidcock, E.; Shields, G.P.; Taylor, R.; Towler, M.; van de Streek, J. Synthesis, *Mercury*: visualization and analysis of crystal structures. *J. Appl. Crystallogr.* **2006**, *39*, 453–457. <https://doi.org/10.1107/S002188980600731X>.
- <sup>14</sup> Spek, A.L. Single-crystal structure validation with the program PLATON, *J. Appl. Crystallogr.* **2003**, *36*, 7–13. <https://doi.org/10.1107/S0021889802022112>.
